# Supplementary material for: Characterizing deep groundwater using evidence from oil and gas exploration wells in the Lower Kutai Basin of Indonesia
Source: Springer Nature journal article supplement (doi:10.1007/s10040-024-02776-0), 2024-02-21
Supplement: MOESM1 [file 26762210]

**Hydrogeology Journal - Electronic Supplementary Material (ESM)**

**Characterizing deep groundwater using evidence from oil and gas exploration wells in the Lower Kutai Basin of Indonesia**

Arifin<sup>1,2\*</sup>, Mohammad Shamsudduha<sup>3</sup>, Agus M. Ramdhan<sup>2</sup>, Sena W. Reksalegora<sup>4</sup> and Richard G. Taylor<sup>1</sup>

<sup>1</sup>Department of Geography, University College London, London WC1E 6BT, UK

<sup>2</sup>Department of Geology, Institut Teknologi Bandung, Bandung 40132, Indonesia

<sup>3</sup>Institute for Risk & Disaster Reduction, University College London, London WC1E 6BT, UK

<sup>4</sup>Department of Geology, Universitas Padjadjaran, Sumedang 45363, Indonesia

\* corresponding author: arifin.arifin.22@ucl.ac.uk

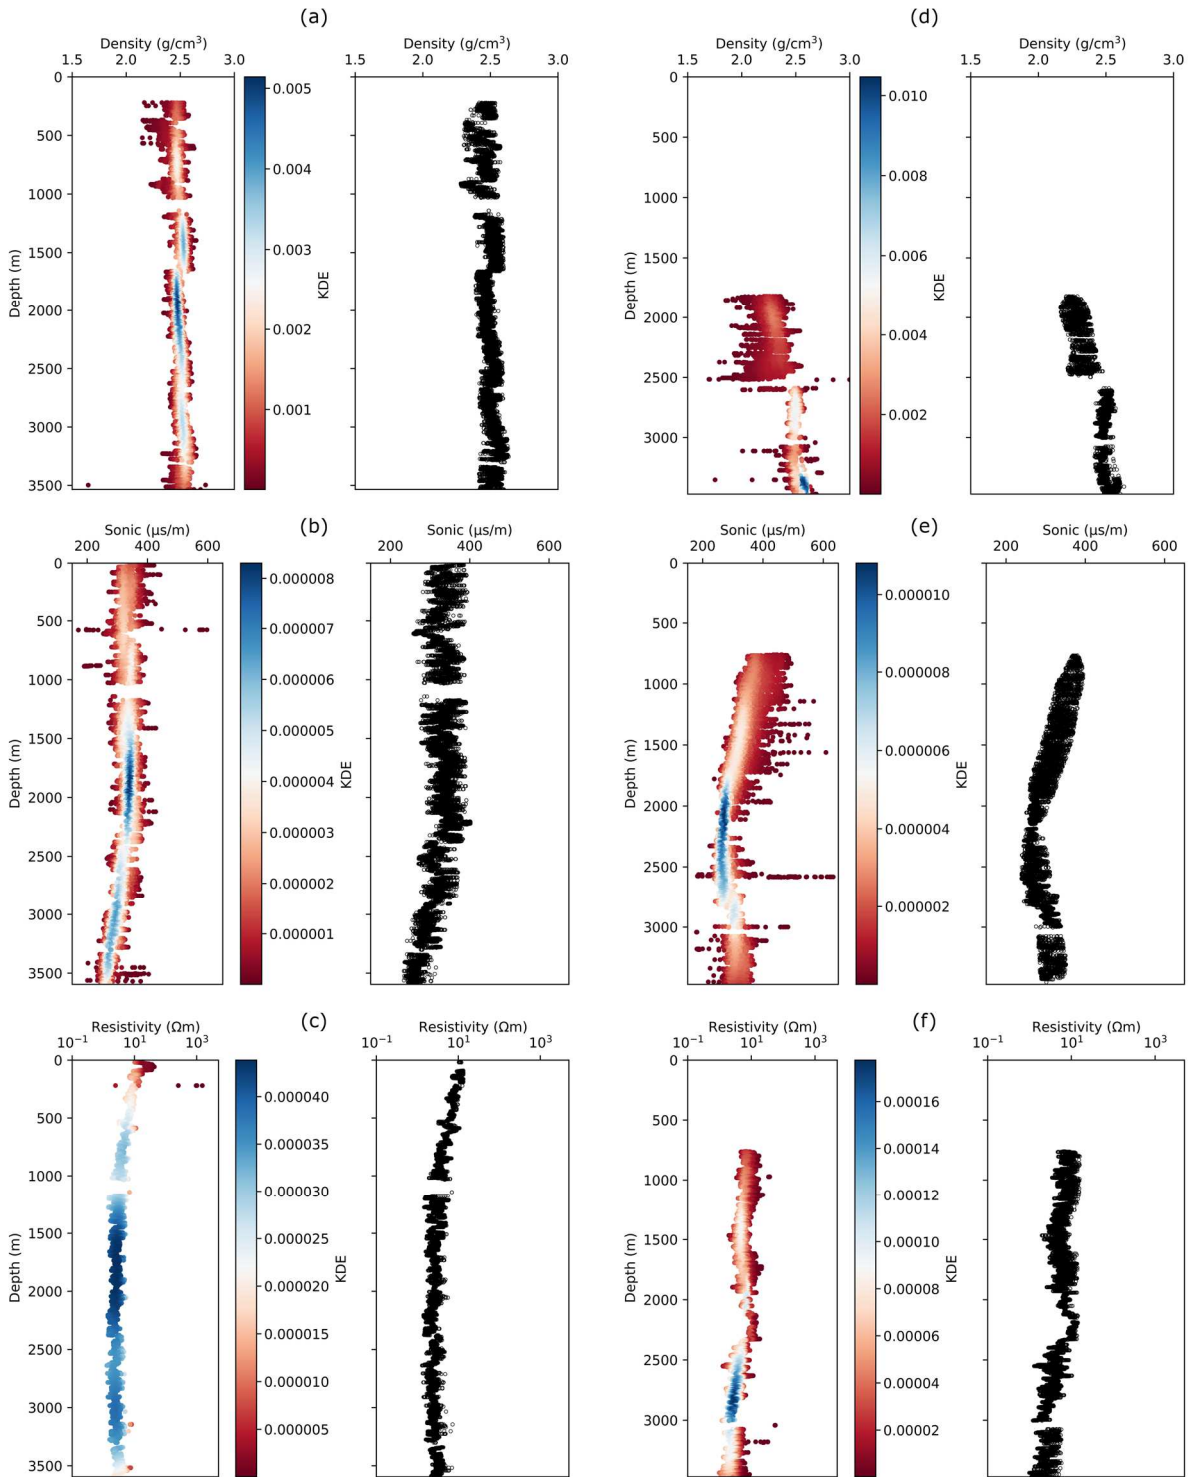

**Fig S1** Examples of wireline logs (density, sonic, and resistivity) filtering using Kernel Density Estimation (KDE) in Python at Wells no. 1 (a, b, c) and Well no. 6 (d, e, f); the original logs are in red to blue whereas the filtered logs are in black; data were provided by PUSDATIN, data center of the Ministry of Energy and Mineral Resources in Indonesia.

**Table S1** Hydrochemical data employed in this study from PUSDATIN, data center of the Ministry of Energy and Mineral Resources in Indonesia.

| Well | Depth (m) | TDS (mg/L) | NaCl (mg/L) | pH    | Na <sup>+</sup> | K <sup>+</sup> | Ca <sup>2+</sup> | Mg <sup>2+</sup> | Cl <sup>-</sup> | HCO <sub>3</sub> <sup>-</sup> | CO <sub>3</sub> <sup>2-</sup> | SO <sub>4</sub> <sup>2-</sup> |
|------|-----------|------------|-------------|-------|-----------------|----------------|------------------|------------------|-----------------|-------------------------------|-------------------------------|-------------------------------|
| 1    | 3295      | 13394      | 10305       | 8.00  | 4696            | n.a.           | 77               | 5                | 5609            | 2780                          | 0                             | 226                           |
| 2    | 671       | 16886      | 9803        | 7.30  | 1153            | n.a.           | 3800             | 583              | 8650            | 2700                          | 0                             | 0                             |
| 3    | 702       | 1045       | 263         | 8.12  | 263             | n.a.           | 40               | 6                | 0               | 464                           | 15                            | 257                           |
| 3    | 1083      | 2000       | 422         | 8.30  | 422             | n.a.           | 85               | 49               | 0               | 927                           | 44                            | 472                           |
| 3    | 1287      | 837        | 214         | 8.02  | 214             | n.a.           | 30               | 2                | 0               | 426                           | 15                            | 151                           |
| 3    | 1715      | 5220       | 3715        | 7.75  | 1762            | n.a.           | 40               | 21               | 1953            | 1208                          | 0                             | 236                           |
| 4    | 3818      | 11465      | 9313        | n.a.  | 3340            | 126            | 1043             | 20               | 5973            | 951                           | 0                             | 12                            |
| 5    | 2575      | 36142      | 31212       | 8.30  | 12619           | 846            | 299              | 48               | 18592           | 2803                          | 13                            | 921                           |
| 5    | 2672      | 19961      | 15468       | 7.88  | 6667            | 216            | 328              | 29               | 8802            | 3549                          | 0                             | 371                           |
| 6    | 3359      | 9017       | 6259        | 7.90  | 3064            | n.a.           | 45               | 21               | 3195            | 2005                          | 0                             | 686                           |
| 7    | 1327      | 30256      | 18047       | 8.00  | 10047           | n.a.           | 160              | 49               | 8000            | 7100                          | 400                           | 4500                          |
| 8    | 1030      | 5929       | 3277        | 8.75  | 1821            | n.a.           | 90               | 58               | 1456            | 1257                          | 65                            | 1182                          |
| 8    | 1111      | 4907       | 2651        | 8.50  | 1533            | n.a.           | 45               | 40               | 1118            | 1174                          | 49                            | 948                           |
| 8    | 1174      | 7426       | 4279        | 8.70  | 2451            | n.a.           | 40               | 18               | 1828            | 1601                          | 104                           | 1385                          |
| 8    | 1176      | 2332       | 1182        | 7.85  | 649             | n.a.           | 40               | 30               | 533             | 1080                          | 0                             | 0                             |
| 8    | 1247      | 7296       | 4054        | 8.50  | 2403            | n.a.           | 30               | 18               | 1651            | 1473                          | 76                            | 1644                          |
| 8    | 1616      | 10052      | 5119        | 9.70  | 3521            | n.a.           | 25               | 3                | 1598            | 2315                          | 1417                          | 1173                          |
| 8    | 1737      | 9288       | 5548        | 8.10  | 3028            | n.a.           | 35               | 12               | 2521            | 3229                          | 60                            | 404                           |
| 8    | 1948      | 9114       | 4781        | 8.50  | 2935            | n.a.           | 30               | 22               | 1846            | 2697                          | 136                           | 1447                          |
| 8    | 2322      | 12784      | 7448        | 8.75  | 4253            | n.a.           | 60               | 24               | 3195            | 3279                          | 403                           | 1569                          |
| 8    | 2339      | 16944      | 10581       | 8.80  | 5789            | n.a.           | 20               | 30               | 4793            | 3921                          | 479                           | 1912                          |
| 8    | 2413      | 8675       | 4373        | 10.40 | 3130            | n.a.           | 50               | 18               | 1243            | 299                           | 1460                          | 2475                          |
| 9    | 2474      | 30936      | 26662       | 7.62  | 11165           | 54             | 500              | 52               | 15497           | 3666                          | 0                             | 2                             |
| 9    | 2533      | 28194      | 24021       | 7.19  | 10080           | 50             | 408              | 51               | 13941           | 3660                          | 0                             | 5                             |
| 9    | 2680      | 26674      | 22877       | 7.60  | 9360            | 54             | 467              | 27               | 13517           | 3245                          | 0                             | 5                             |
| 9    | 3176      | 25613      | 22685       | 7.80  | 8835            | 62             | 817              | 20               | 13850           | 2025                          | 0                             | 5                             |
| 10   | 2411      | 28595      | 26133       | 6.84  | 10567           | 31             | 218              | 45               | 15567           | 2131                          | 0                             | 37                            |
| 10   | 3232      | 23039      | 20525       | 6.67  | 8100            | 95             | 138              | 20               | 12425           | 2155                          | 0                             | 105                           |
| 10   | 3419      | 16325      | 13765       | 6.74  | 5600            | 69             | 106              | 8                | 8165            | 2322                          | 0                             | 55                            |
| 10   | 3498      | 29660      | 27818       | 7.21  | 10600           | 142            | 502              | 25               | 17218           | 1108                          | 0                             | 65                            |
| 11   | 3226      | 19728      | 17670       | 6.77  | 7550            | n.a.           | 227              | 16               | 10120           | 1710                          | 0                             | 105                           |
| 12   | 2972      | 17798      | 13619       | 6.87  | 6040            | 47             | 293              | 30               | 7579            | 3779                          | 0                             | 31                            |
| 12   | 3438      | 9595       | 7242        | 7.15  | 3150            | 35             | 173              | 4                | 4092            | 2040                          | 0                             | 102                           |
| 12   | 3454      | 11350      | 8653        | 7.30  | 3925            | 33             | 50               | 3                | 4728            | 2594                          | 0                             | 17                            |
| 12   | 3483      | 9556       | 7650        | 6.80  | 3100            | 45             | 245              | 4                | 4550            | 1609                          | 0                             | 2                             |
| 13   | 3653      | 16508      | 15006       | 6.98  | 5990            | 67             | 71               | 8                | 9016            | 1310                          | 0                             | 45                            |
| 13   | 3850      | 11742      | 9755        | 7.16  | 4075            | 17             | 93               | 4                | 5680            | 1840                          | 0                             | 33                            |
| 13   | 3852      | 12180      | 10272       | 7.49  | 4322            | 21             | 213              | 4                | 5950            | 1630                          | 0                             | 40                            |
| 14   | 2268      | 4145       | 1463        | 7.51  | 1104            | 68             | 4                | 30               | 359             | 2578                          | 0                             | 2                             |
| 15   | 1643      | 3589       | 2058        | 8.36  | 1170            | 12             | 6                | 19               | 888             | 1015                          | 113                           | 366                           |
| 15   | 1665      | 2643       | 1162        | 8.81  | 834             | 8              | 4                | 3                | 328             | 970                           | 113                           | 383                           |

| Well | Depth (m) | TDS (mg/L) | NaCl (mg/L) | pH   | Na <sup>+</sup> | K <sup>+</sup> | Ca <sup>2+</sup> | Mg <sup>2+</sup> | Cl <sup>-</sup> | HCO <sub>3</sub> <sup>-</sup> | CO <sub>3</sub> <sup>2-</sup> | SO <sub>4</sub> <sup>2-</sup> |
|------|-----------|------------|-------------|------|-----------------|----------------|------------------|------------------|-----------------|-------------------------------|-------------------------------|-------------------------------|
| 15   | 2138      | 3586       | 1407        | 8.52 | 1100            | 13             | 2                | 3                | 307             | 1501                          | 120                           | 540                           |
| 15   | 2215      | 10834      | 3913        | 8.62 | 3302            | 17             | 2                | 2                | 611             | 5100                          | 480                           | 1320                          |
| 16   | 3392      | 22153      | 12923       | 7.81 | 7066            | n.a.           | 120              | 30               | 5858            | 8679                          | 0                             | 399                           |
| 17   | 497       | 424        | 123         | 8.47 | 94              | n.a.           | 16               | 10               | 28              | 250                           | 26                            | 0                             |
| 18   | 1474      | 784        | 394         | 7.30 | 225             | n.a.           | 17               | 4                | 170             | 339                           | 0                             | 29                            |
| 18   | 1553      | 2198       | 918         | 7.93 | 589             | n.a.           | 66               | 6                | 329             | 1141                          | 0                             | 67                            |
| 18   | 1605      | 1567       | 609         | 7.58 | 425             | n.a.           | 31               | 6                | 184             | 866                           | 0                             | 55                            |
| 18   | 1751      | 1312       | 354         | 7.02 | 261             | n.a.           | 100              | 5                | 93              | 822                           | 0                             | 32                            |
| 18   | 1924      | 821        | 351         | 7.70 | 231             | n.a.           | 15               | 4                | 120             | 374                           | 0                             | 77                            |
| 18   | 2005      | 470        | 183         | 7.21 | 109             | n.a.           | 26               | 5                | 74              | 230                           | 0                             | 27                            |
| 19   | 3244      | 20593      | 18612       | 8.85 | 7784            | n.a.           | 53               | 26               | 10828           | 1041                          | 229                           | 633                           |
| 20   | 3715      | 11093      | 8781        | 8.92 | 3939            | 73             | 29               | 6                | 4842            | 2058                          | 136                           | 11                            |
| 20   | 3774      | 10872      | 8878        | 8.56 | 3887            | 65             | 35               | 6                | 4990            | 1811                          | 61                            | 17                            |
| 20   | 4076      | 10198      | 7974        | 8.93 | 3666            | 48             | 9                | 4                | 4308            | 1879                          | 195                           | 88                            |
| 20   | 4248      | 8503       | 5727        | 9.00 | 2936            | 37             | 13               | 2                | 2791            | 2301                          | 307                           | 115                           |
| 21   | 3950      | 16664      | 14471       | 6.80 | 6169            | 49             | 99               | 12               | 8302            | 1989                          | 0                             | 45                            |
| 21   | 3728      | 13405      | 11716       | 6.90 | 4750            | 73             | 350              | 9                | 6966            | 1246                          | 0                             | 12                            |
| 22   | 3434      | 15604      | 13377       | 7.20 | 5370            | 44             | 365              | 6                | 8007            | 1806                          | 0                             | 7                             |
| 22   | 3656      | 7358       | 3729        | 6.93 | 900             | 1875           | 320              | 10               | 2829            | 1385                          | 0                             | 40                            |
| 23   | 1731      | 3209       | 1151        | 7.33 | 925             | 17             | 19               | 11               | 226             | 2001                          | 0                             | 10                            |
| 23   | 1822      | 750        | 229         | 7.43 | 191             | 10             | 10               | 10               | 38              | 488                           | 0                             | 2                             |
| 23   | 3482      | 11972      | 9043        | 7.08 | 4030            | 25             | 55               | 7                | 5013            | 2830                          | 0                             | 12                            |
| 23   | 3566      | 12401      | 9007        | 7.51 | 4030            | 31             | 50               | 26               | 4977            | 3281                          | 0                             | 6                             |
| 24   | 3496      | 19236      | 16891       | 7.67 | 6425            | 74             | 407              | 182              | 10466           | 1182                          | 0                             | 500                           |
| 25   | 2934      | 22273      | 18512       | 7.35 | 6868            | 58             | 1045             | 31               | 11644           | 2623                          | 0                             | 4                             |
| 26   | 3505      | 11941      | 7993        | 6.89 | 4070            | 29             | 62               | 3                | 3923            | 3733                          | 0                             | 120                           |
| 26   | 3507      | 11875      | 8196        | 7.58 | 4060            | 25             | 51               | 3                | 4136            | 3451                          | 0                             | 150                           |
| 26   | 3514      | 8769       | 6275        | 7.76 | 2760            | 33             | 200              | 2                | 3515            | 2089                          | 0                             | 170                           |
| 26   | 3562      | 13422      | 9844        | 6.78 | 4750            | 22             | 49               | 3                | 5094            | 3354                          | 0                             | 150                           |
| 27   | 3535      | 13061      | 10459       | 7.65 | 4495            | 38             | 129              | 3                | 5964            | 2301                          | 0                             | 130                           |
| 27   | 3543      | 14377      | 11780       | 7.68 | 4385            | 58             | 695              | 13               | 7395            | 1661                          | 0                             | 170                           |
| 27   | 3744      | 15257      | 12874       | 7.42 | 4865            | 54             | 613              | 15               | 8009            | 1597                          | 0                             | 105                           |
| 28   | 3477      | 14275      | 11426       | 7.57 | 4425            | 55             | 730              | 12               | 7001            | 1989                          | 0                             | 64                            |
| 28   | 3485      | 10340      | 7583        | 7.28 | 3144            | 40             | 475              | 5                | 4440            | 2196                          | 0                             | 40                            |
| 29   | 3422      | 10202      | 6577        | n.a. | 3382            | n.a.           | 50               | 24               | 3195            | 3010                          | 68                            | 473                           |
| 29   | 3742      | 10087      | 5998        | n.a. | 3247            | n.a.           | 50               | 21               | 2751            | 3650                          | 31                            | 337                           |
| 29   | 3895      | 21810      | 17987       | n.a. | 7869            | n.a.           | 60               | 61               | 10118           | 2768                          | 0                             | 934                           |
| 29   | 3949      | 22202      | 18381       | n.a. | 8086            | n.a.           | 40               | 55               | 10295           | 2652                          | 155                           | 919                           |
| 30   | 3332      | 20008      | 15985       | 6.74 | 5160            | 66             | 2120             | 24               | 10825           | 1814                          | 0                             | 0                             |
| 32   | 2707      | 21612      | 18386       | 7.39 | 7266            | 76             | 552              | 29               | 11120           | 2493                          | 4                             | 71                            |
| 33   | 3368      | 16555      | 12993       | 7.35 | 5820            | 30             | 167              | 7                | 7173            | 3355                          | 0                             | 3                             |
| 33   | 3550      | 16288      | 13444       | 6.74 | 5500            | 497            | 292              | 8                | 7944            | 2048                          | 0                             | 0                             |
| 33   | 3642      | 12854      | 8103        | 7.94 | 4140            | 273            | 75               | 2                | 3963            | 4399                          | 0                             | 2                             |
| 33   | 3644      | 11188      | 7630        | 7.56 | 3678            | 36             | 175              | 3                | 3952            | 3342                          | 0                             | 2                             |
| 34   | 3446      | 13113      | 9760        | 7.26 | 4386            | 35             | 94               | 7                | 5374            | 3209                          | 0                             | 8                             |

| Well            | Depth (m) | TDS (mg/L) | NaCl (mg/L) | pH   | Na <sup>+</sup> | K <sup>+</sup> | Ca <sup>2+</sup> | Mg <sup>2+</sup> | Cl <sup>-</sup> | HCO <sub>3</sub> <sup>-</sup> | CO <sub>3</sub> <sup>2-</sup> | SO <sub>4</sub> <sup>2-</sup> |
|-----------------|-----------|------------|-------------|------|-----------------|----------------|------------------|------------------|-----------------|-------------------------------|-------------------------------|-------------------------------|
| 34              | 3667      | 17521      | 15304       | 7.58 | 6076            | 42             | 265              | 10               | 9228            | 1891                          | 0                             | 9                             |
| 34              | 3714      | 13621      | 10731       | 7.83 | 4331            | 46             | 423              | 14               | 6400            | 2403                          | 0                             | 4                             |
| 34              | 3898      | 10829      | 8844        | 7.87 | 3774            | 20             | 100              | 3                | 5070            | 1860                          | 0                             | 2                             |
| 35              | 3847      | 8693       | 5594        | 7.34 | 2825            | 35             | 119              | 3                | 2769            | 2934                          | 0                             | 8                             |
| 35              | 4004      | 15617      | 12716       | 7.57 | 4125            | 90             | 1550             | 10               | 8591            | 1171                          | 0                             | 80                            |
| 35              | 4148      | 9828       | 6800        | 7.35 | 3250            | 35             | 90               | 3                | 3550            | 2830                          | 0                             | 70                            |
| 36              | 3600      | 18944      | 17349       | 7.60 | 6650            | 34             | 323              | 20               | 10699           | 1190                          | 0                             | 28                            |
| 36              | 3611      | 12513      | 11594       | 8.60 | 4530            | 30             | 250              | 8                | 7064            | 566                           | 60                            | 6                             |
| 36              | 3732      | 20968      | 18891       | 8.20 | 7300            | 39             | 345              | 22               | 11591           | 1632                          | 9                             | 30                            |
| 36              | 3800      | 22841      | 21450       | 8.30 | 8650            | 36             | 275              | 12               | 12800           | 1050                          | 16                            | 3                             |
| 36              | 3824      | 19184      | 18439       | 7.90 | 6700            | 34             | 545              | 15               | 11739           | 151                           | 0                             | 1                             |
| 36              | 3864      | 27993      | 26459       | 8.10 | 10750           | 39             | 160              | 19               | 15709           | 1283                          | 18                            | 15                            |
| 37              | 3486      | 16383      | 14156       | 7.40 | 5085            | 16             | 980              | 16               | 9071            | 1214                          | 0                             | 1                             |
| 37              | 3596      | 13723      | 10549       | 7.50 | 4930            | 26             | 11               | 3                | 5619            | 3127                          | 0                             | 8                             |
| 38              | 1127      | 27577      | 25824       | 7.74 | 10209           | 68             | 312              | 75               | 15615           | 1296                          | 0                             | 3                             |
| 38              | 3106      | 24433      | 15656       | 6.74 | 6950            | 67             | 750              | 19               | 8706            | 7761                          | 0                             | 180                           |
| 39              | 3784      | 18405      | 16282       | 6.70 | 6520            | 206            | 83               | 8                | 9762            | 1806                          | 0                             | 20                            |
| 40              | 3266      | 12658      | 10312       | n.a. | 4490            | 48             | 285              | 30               | 5822            | 1981                          | 0                             | 2                             |
| 41              | 3182      | 17393      | 14413       | 7.05 | 6390            | 44             | 94               | 10               | 8023            | 2808                          | 0                             | 24                            |
| 42              | 2311      | 34329      | 29220       | n.a. | 11559           | n.a.           | 1211             | 60               | 17661           | 2238                          | 0                             | 1600                          |
| 42              | 2807      | 24895      | 19047       | n.a. | 7154            | n.a.           | 1424             | 243              | 11893           | 3331                          | 0                             | 850                           |
| 43              | 3069      | 19344      | 15990       | 7.53 | 6400            | 46             | 448              | 15               | 9590            | 2570                          | 0                             | 275                           |
| 43              | 3083      | 16028      | 12875       | 7.59 | 5450            | 38             | 180              | 8                | 7425            | 2776                          | 0                             | 150                           |
| 43              | 3123      | 17907      | 15060       | 7.64 | 5650            | 56             | 748              | 14               | 9410            | 1915                          | 0                             | 115                           |
| 43              | 3149      | 14414      | 11380       | 7.82 | 5240            | 31             | 65               | 8                | 6140            | 2830                          | 0                             | 100                           |
| 44              | 2880      | 24442      | 19134       | n.a. | 6585            | 131            | 2432             | 13               | 12549           | 2113                          | 0                             | 619                           |
| 44              | 2928      | 21763      | 16911       | n.a. | 6705            | 112            | 1352             | 21               | 10206           | 2522                          | 0                             | 845                           |
| 44              | 2994      | 15965      | 12035       | n.a. | 4580            | 101            | 1004             | 25               | 7455            | 2514                          | 0                             | 286                           |
| 44              | 3017      | 14366      | 10868       | n.a. | 4655            | 95             | 492              | 7                | 6213            | 2507                          | 0                             | 397                           |
| 45              | 2583      | 34767      | 32057       | 7.24 | 12350           | 70             | 590              | 61               | 19707           | 1989                          | 0                             | 0                             |
| 45              | 2880      | 22535      | 19339       | 6.94 | 8050            | 50             | 195              | 17               | 11289           | 2934                          | 0                             | 0                             |
| <b>Seawater</b> |           | 36307      | 30335       | n.a. | 10810           | 390            | 420              | 1245             | 19525           | 122                           | 0                             | 3795                          |

n.a.: not available

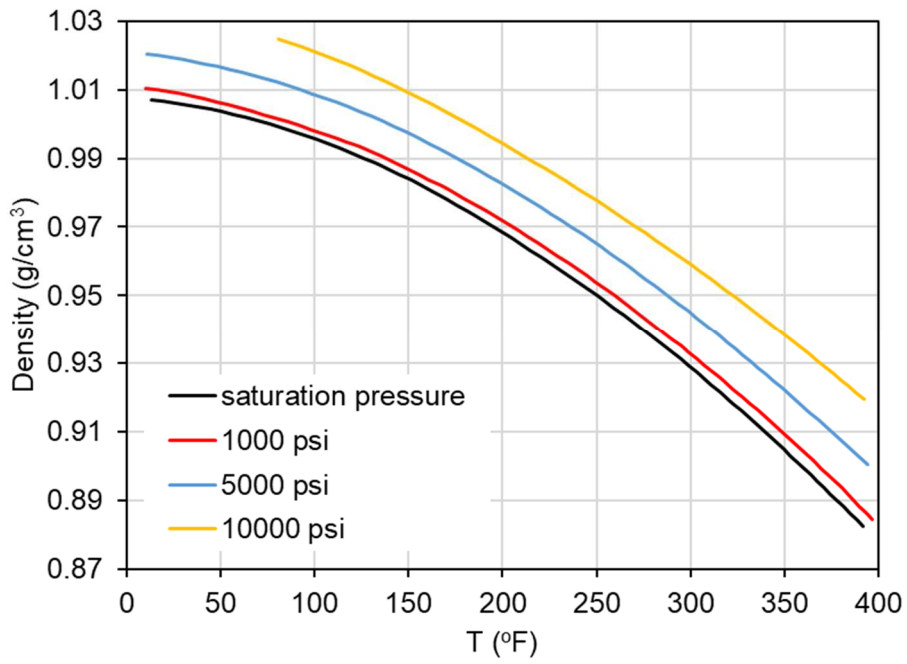

**Fig. S2** Density of pure water as a function of temperature and pressure (Numbere et al. 1997)

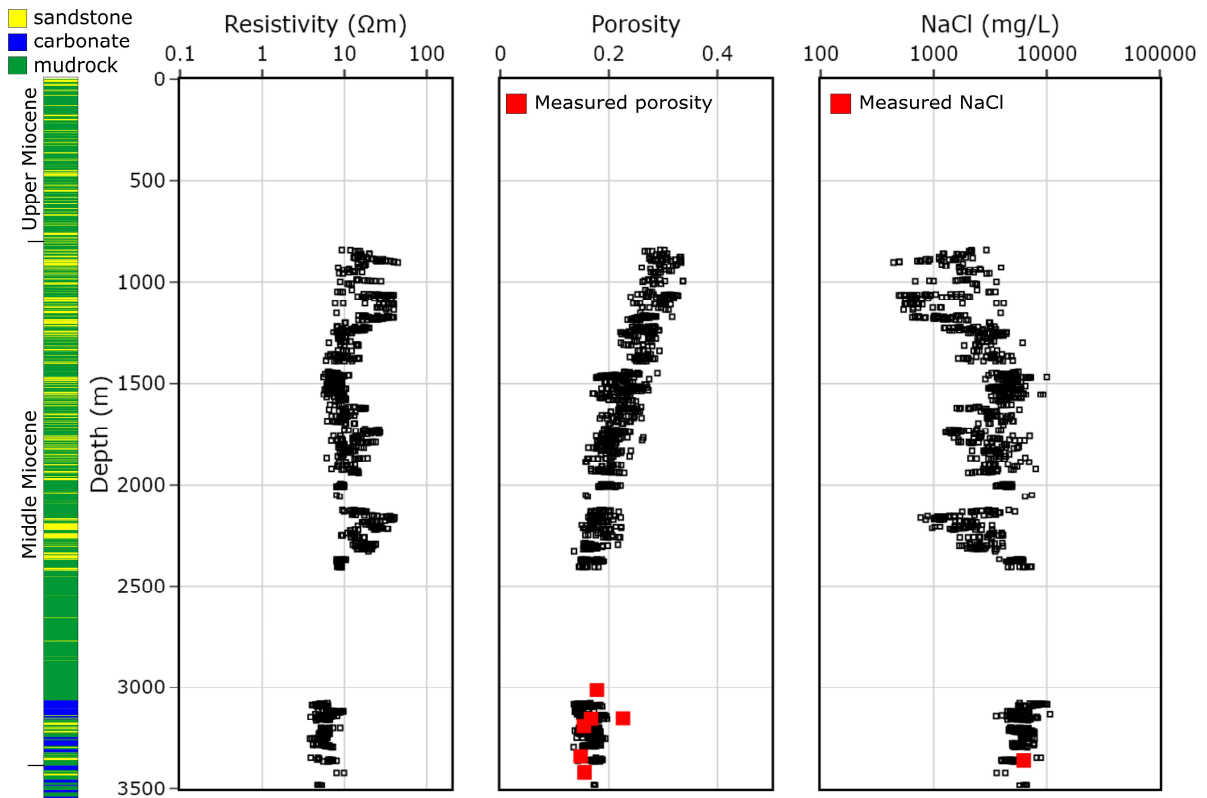

**Fig. S3** The result of NaCl estimation at Well no. 6

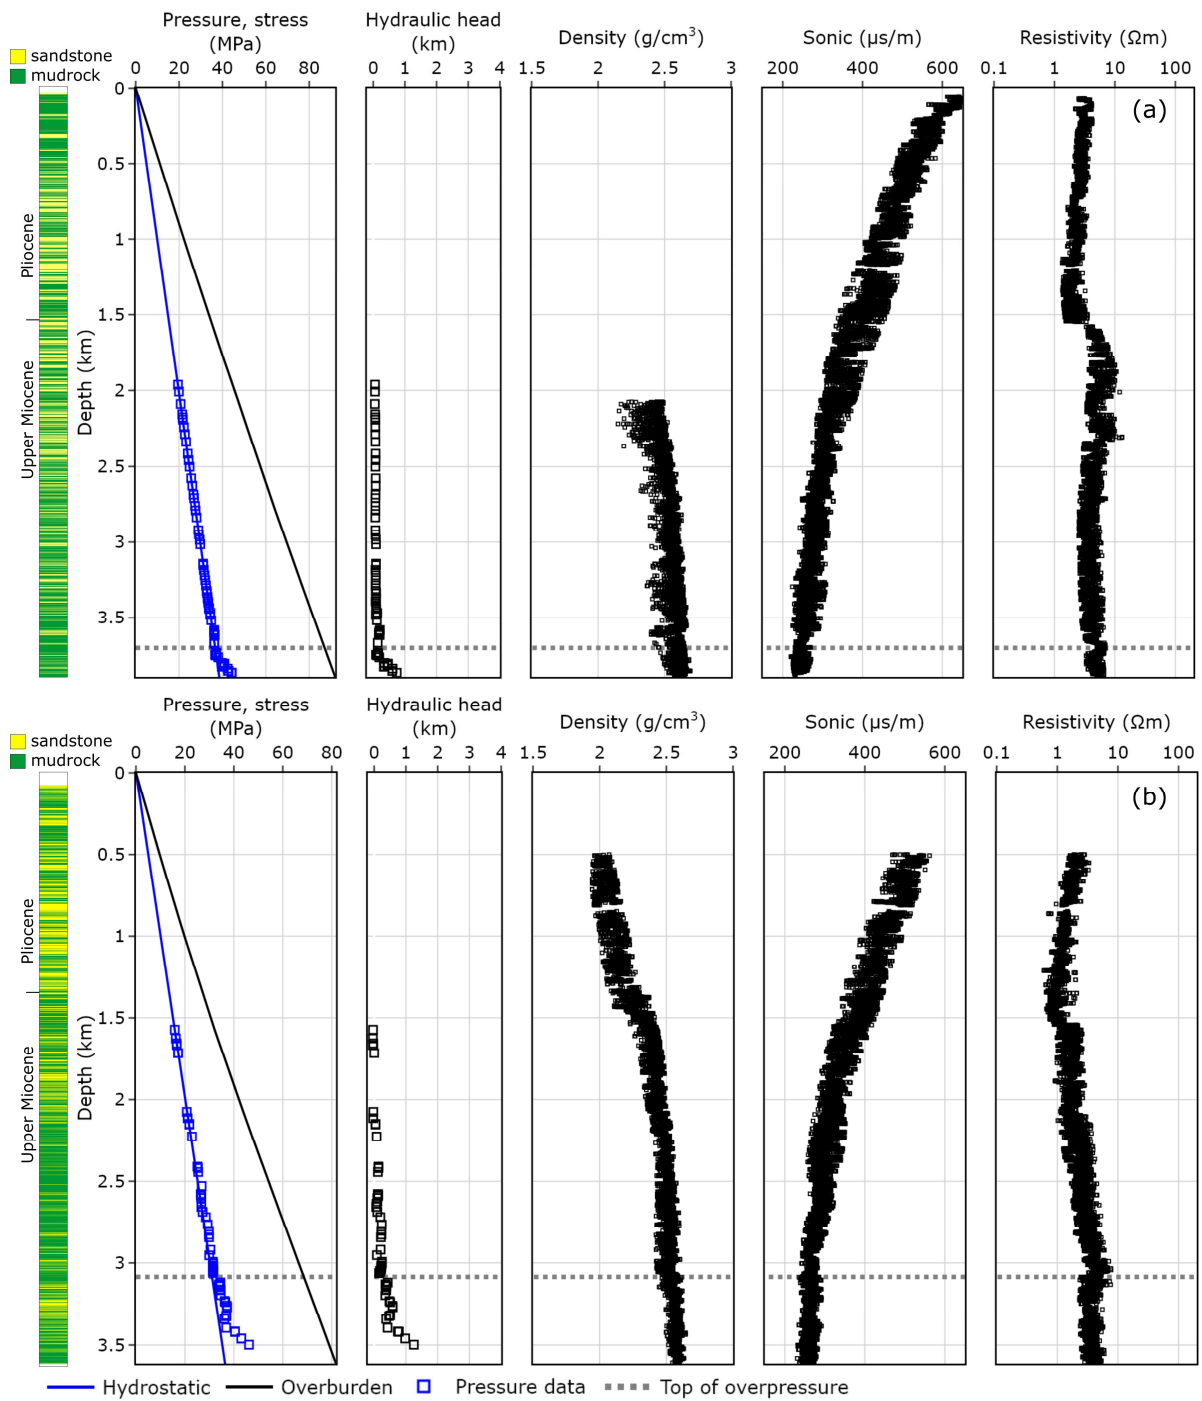

**Fig. S4** Lithology, pressure-stress depth plot, computed hydraulic head and wireline logs in mudrocks at **a** Well no. 36 and **b** Well no. 10

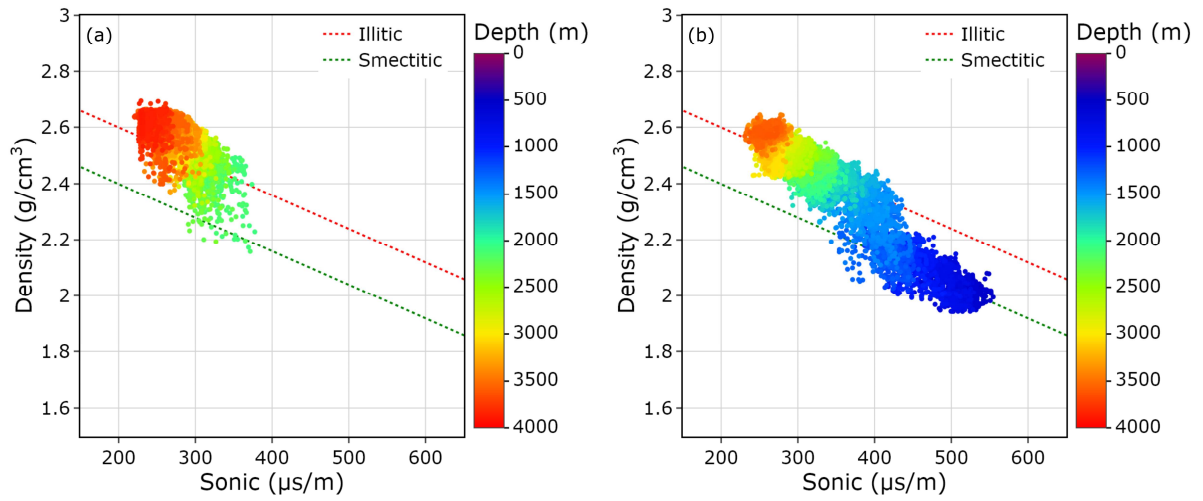

**Fig. S5** Sonic-density cross plot of mudrocks at **a** Well no. 36 and **b** Well no. 10



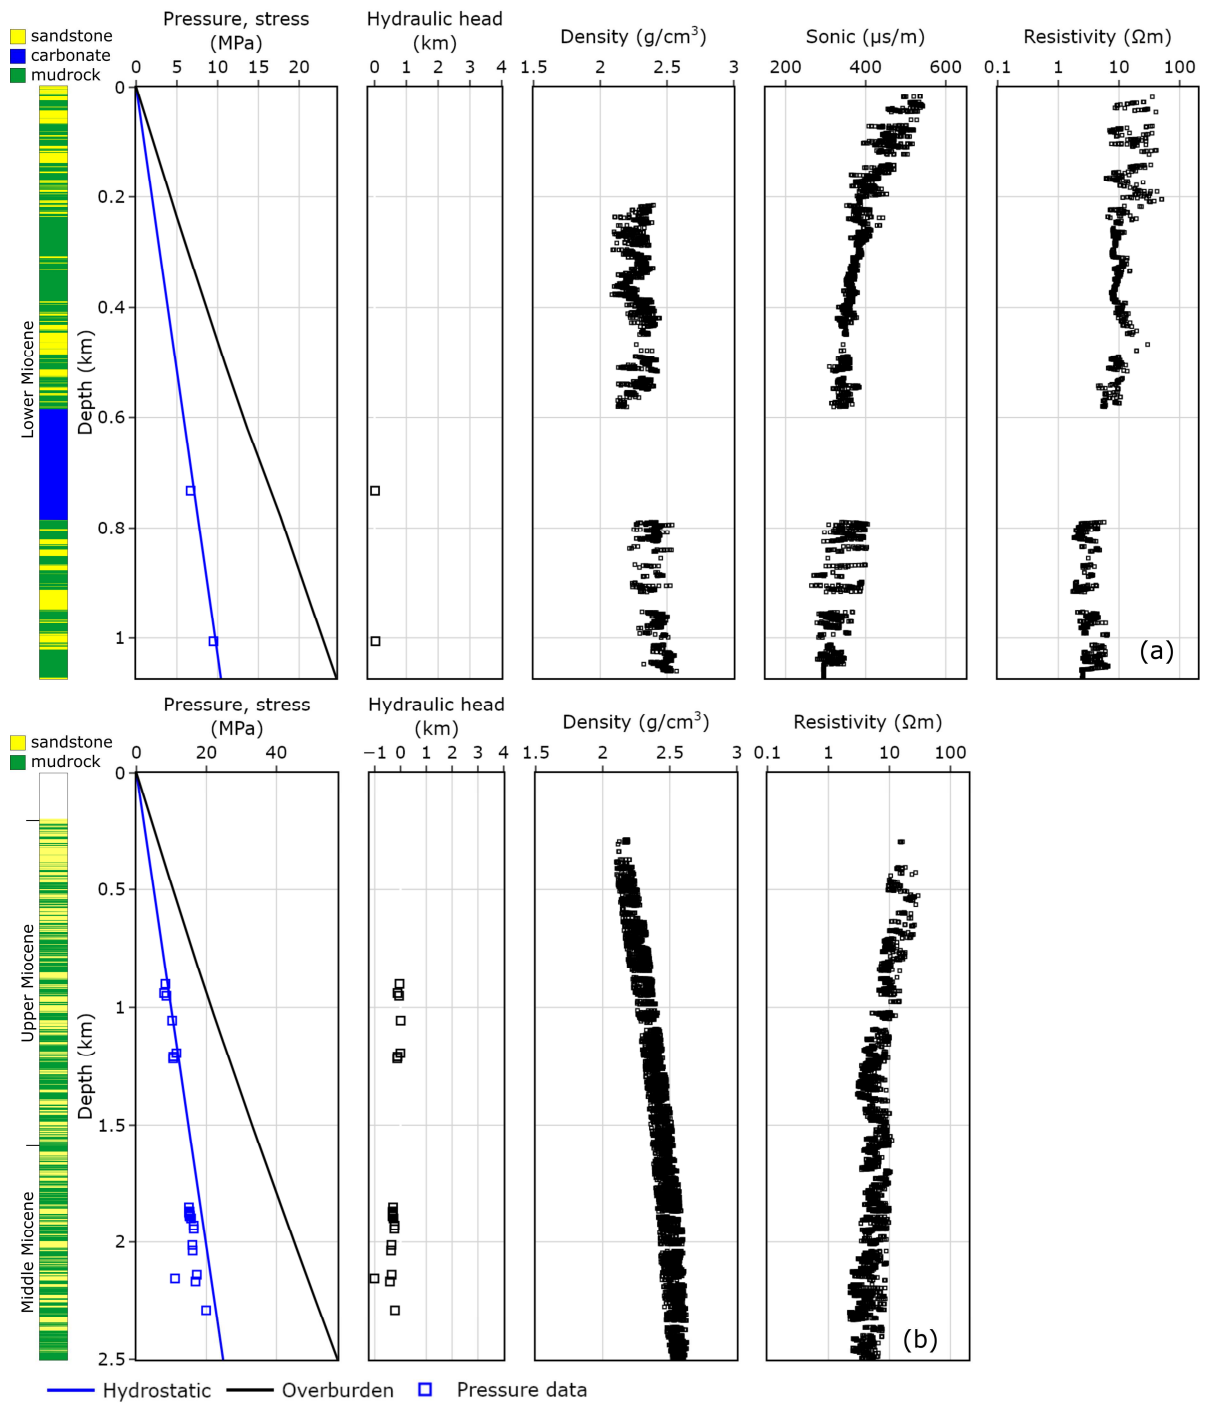

**Fig. S6** Lithology, pressure-stress depth plot, computed hydraulic head and wireline logs in mudrocks at **a** Well no. 2 and **b** Well no. 14

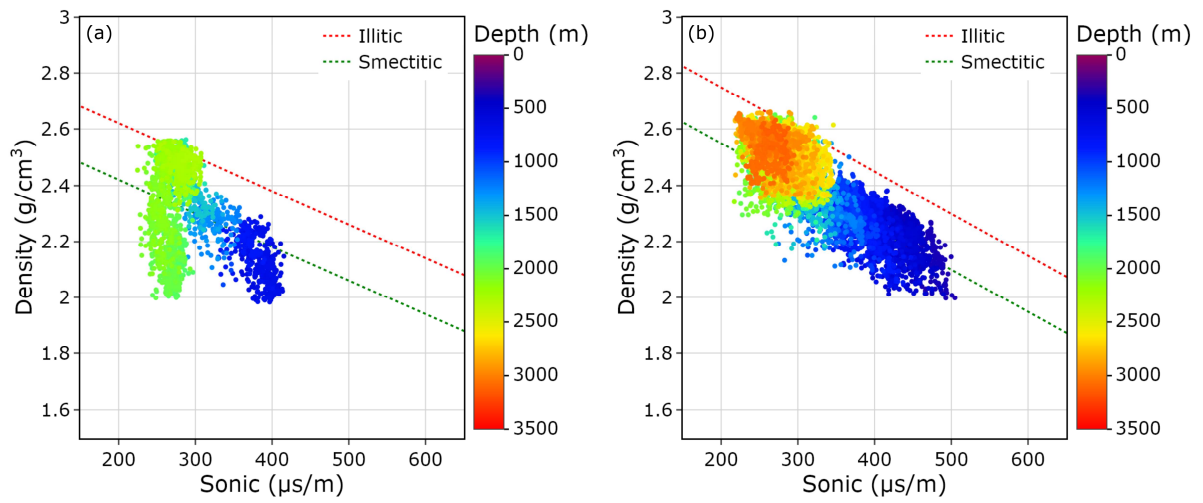

**Fig. S7** Sonic-density cross plot of mudrocks at **a** Well no. 3 and **b** Well no. 8

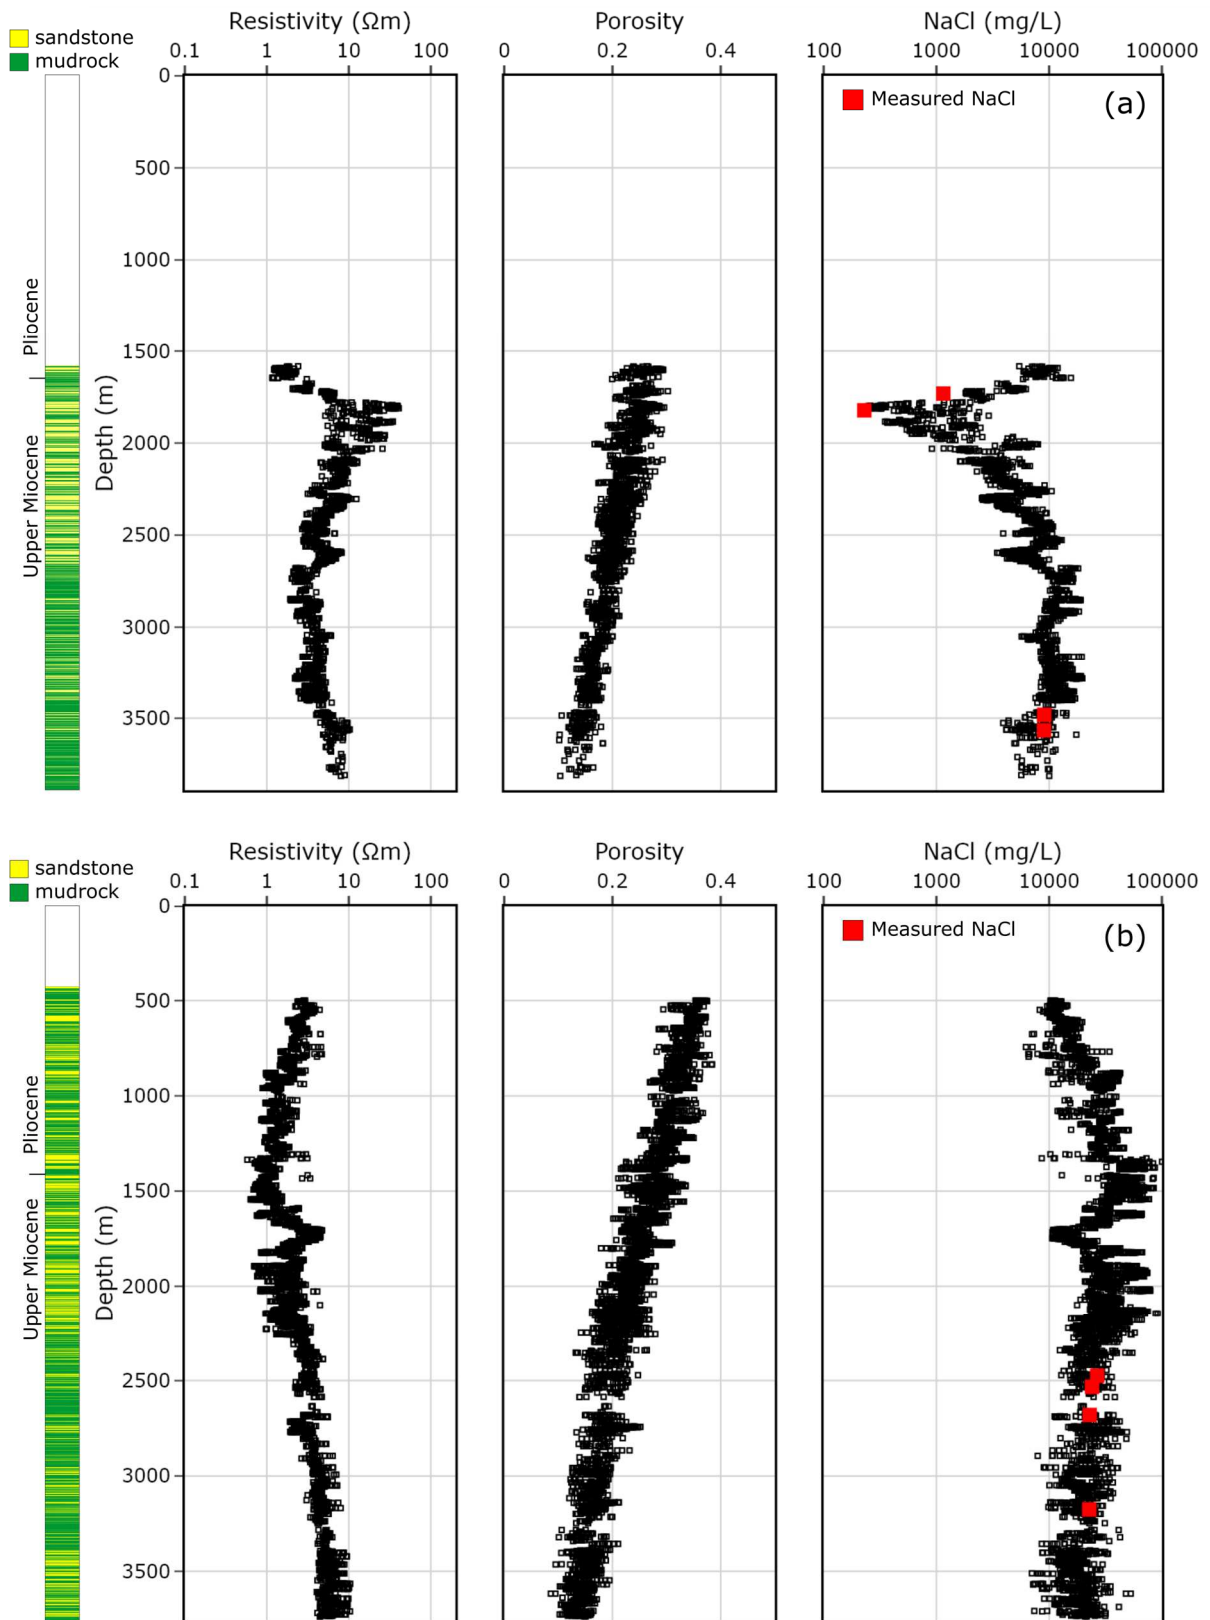

**Fig. S8** The result of NaCl estimation at **a** Well no. 23 and **b** Well no. 9

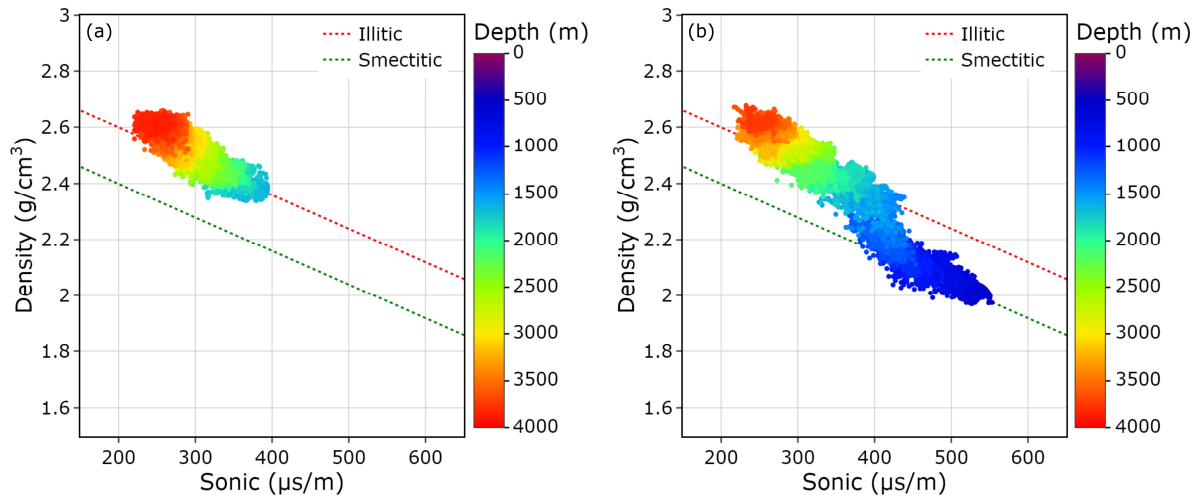

**Fig. S9** Sonic-density cross plot of mudrocks at **a** Well no. 23 and **b** Well no. 9

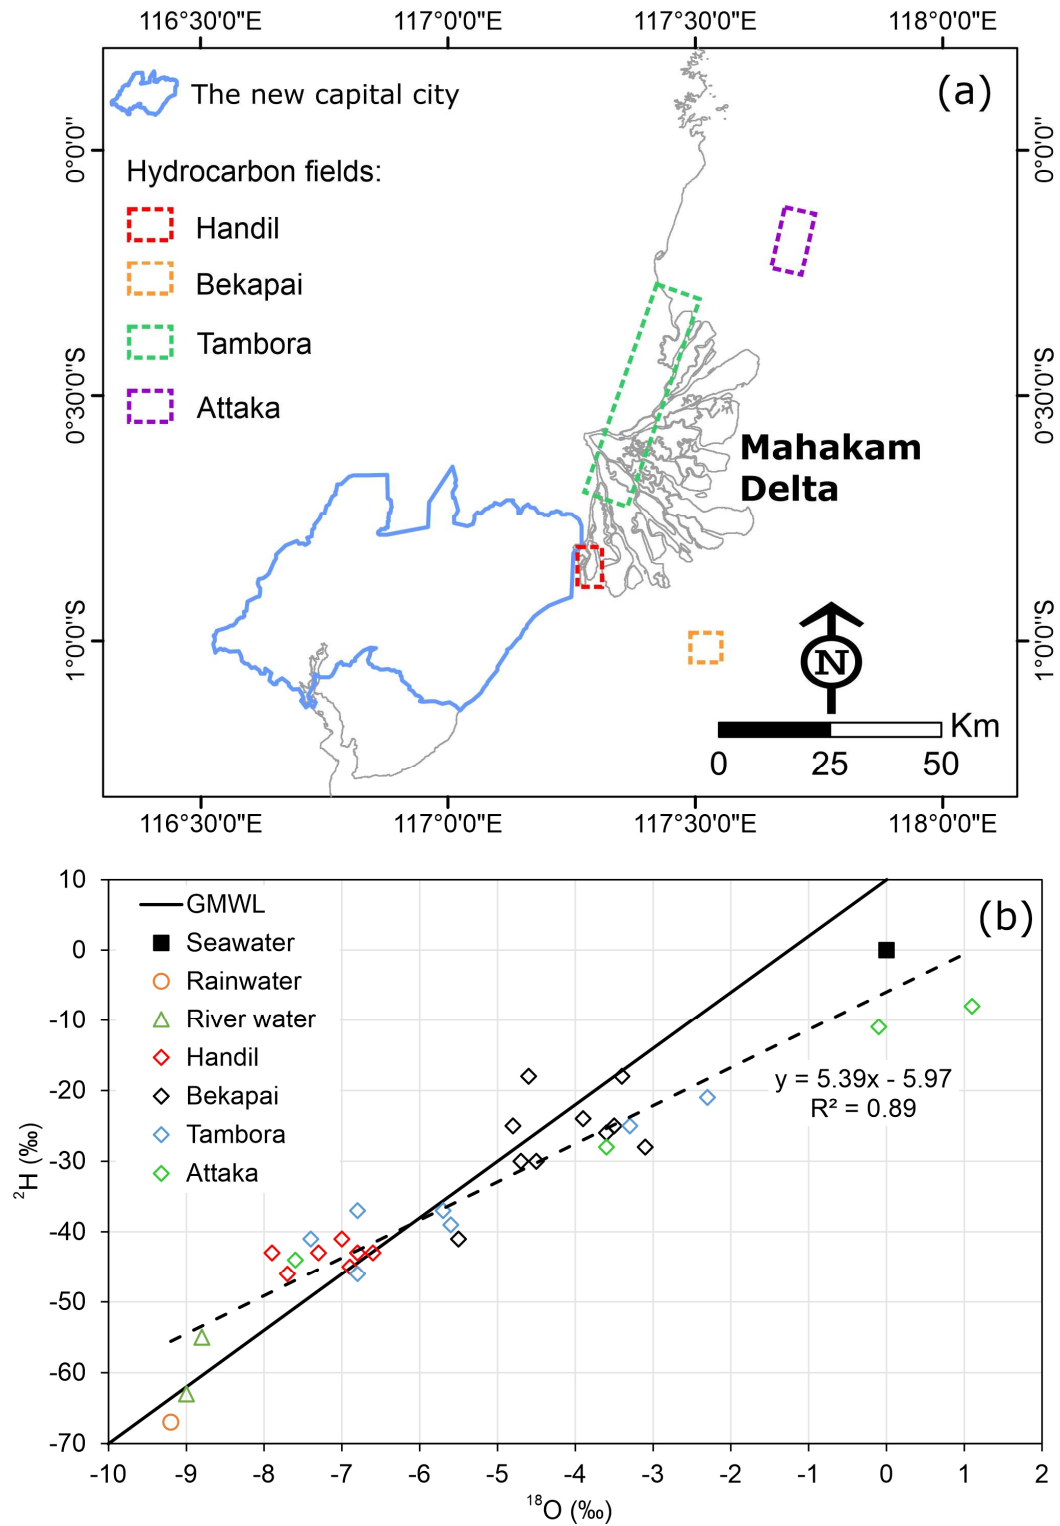

**Fig. S10 a** Location of some hydrocarbon fields in the Lower Kutai Basin; **b** Stable isotopes of deuterium ( $^2\text{H}$ ) and oxygen-18 ( $^{18}\text{O}$ ) from Furlan et al. (1995); GMWL refers to the global meteoric water line

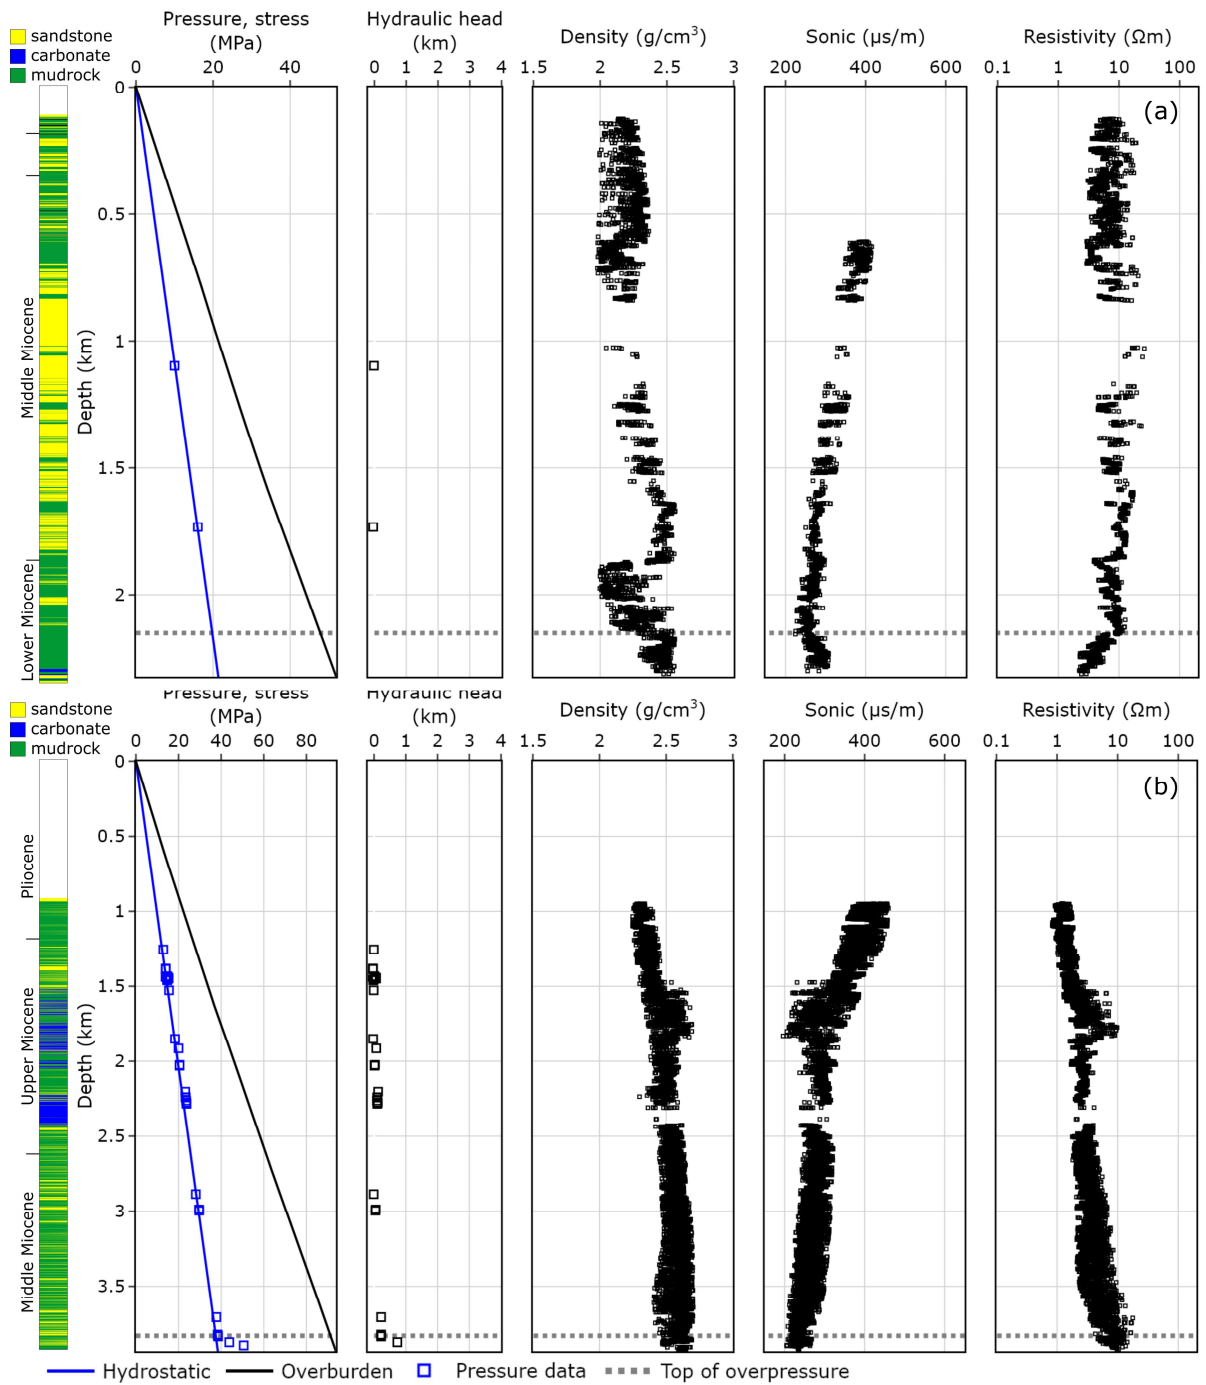

**Fig. S11** Lithology, pressure-stress depth plot, computed hydraulic head and wireline logs in mudrocks at **a** Well no. 3 and **b** Well no. 4

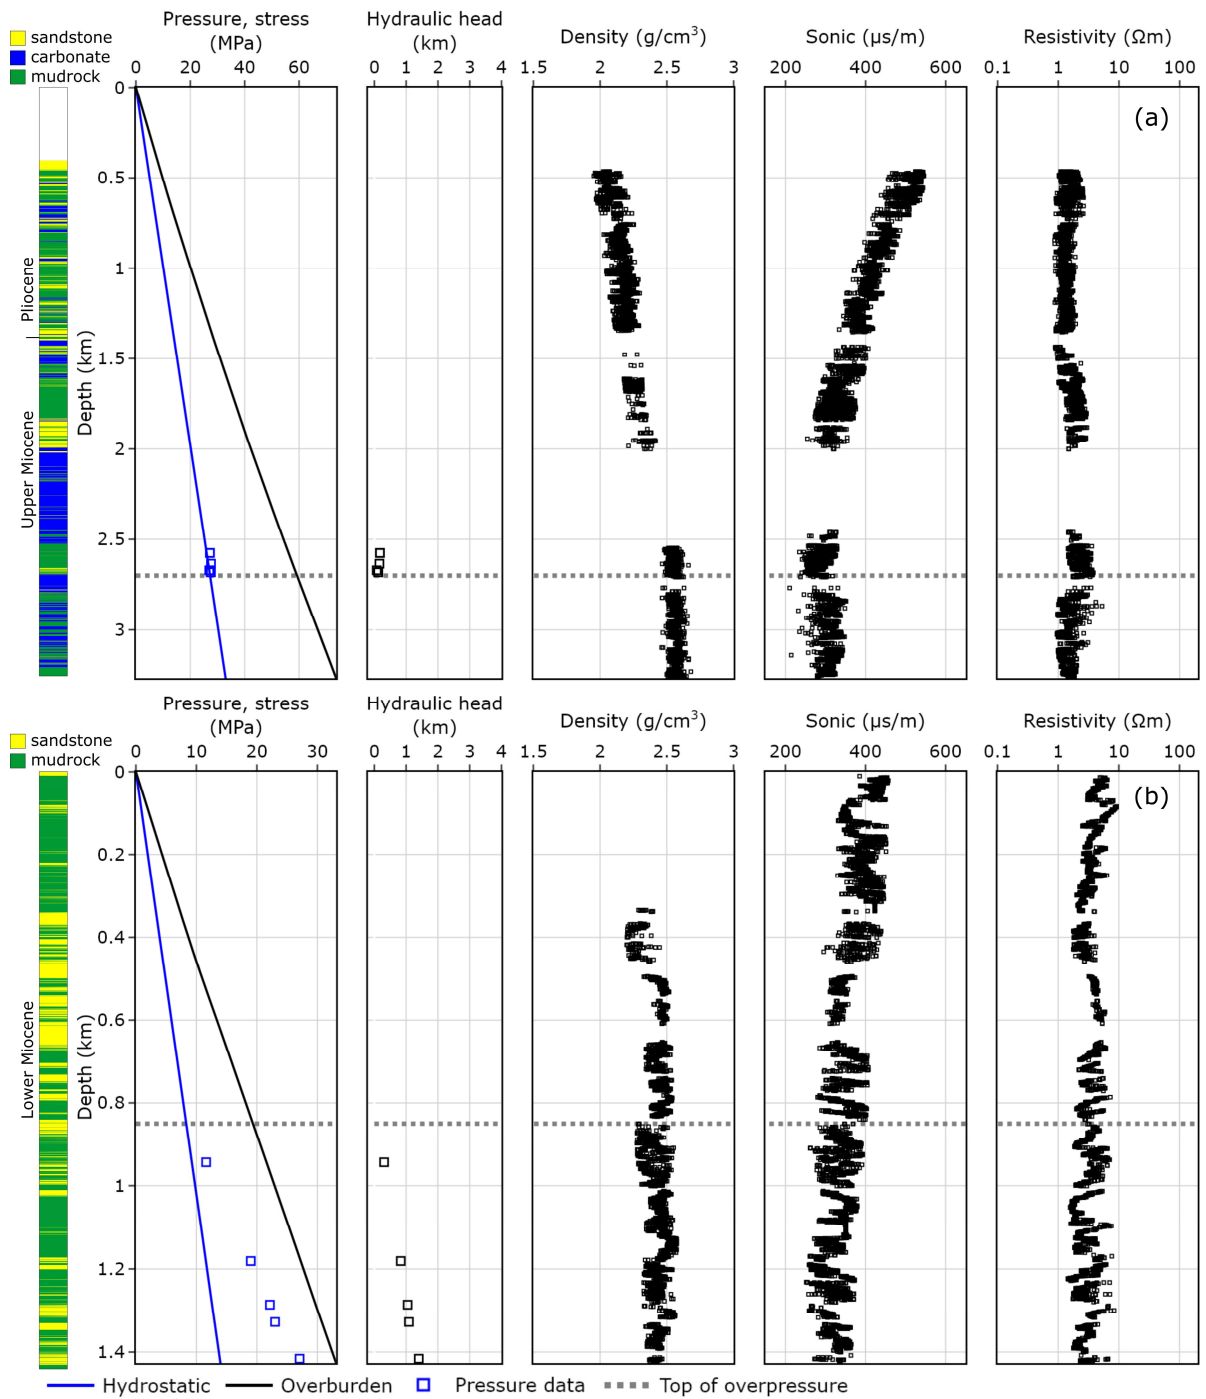

**Fig. S12** Lithology, pressure-stress depth plot, computed hydraulic head and wireline logs in mudrocks at **a** Well no. 5 and **b** Well no. 7

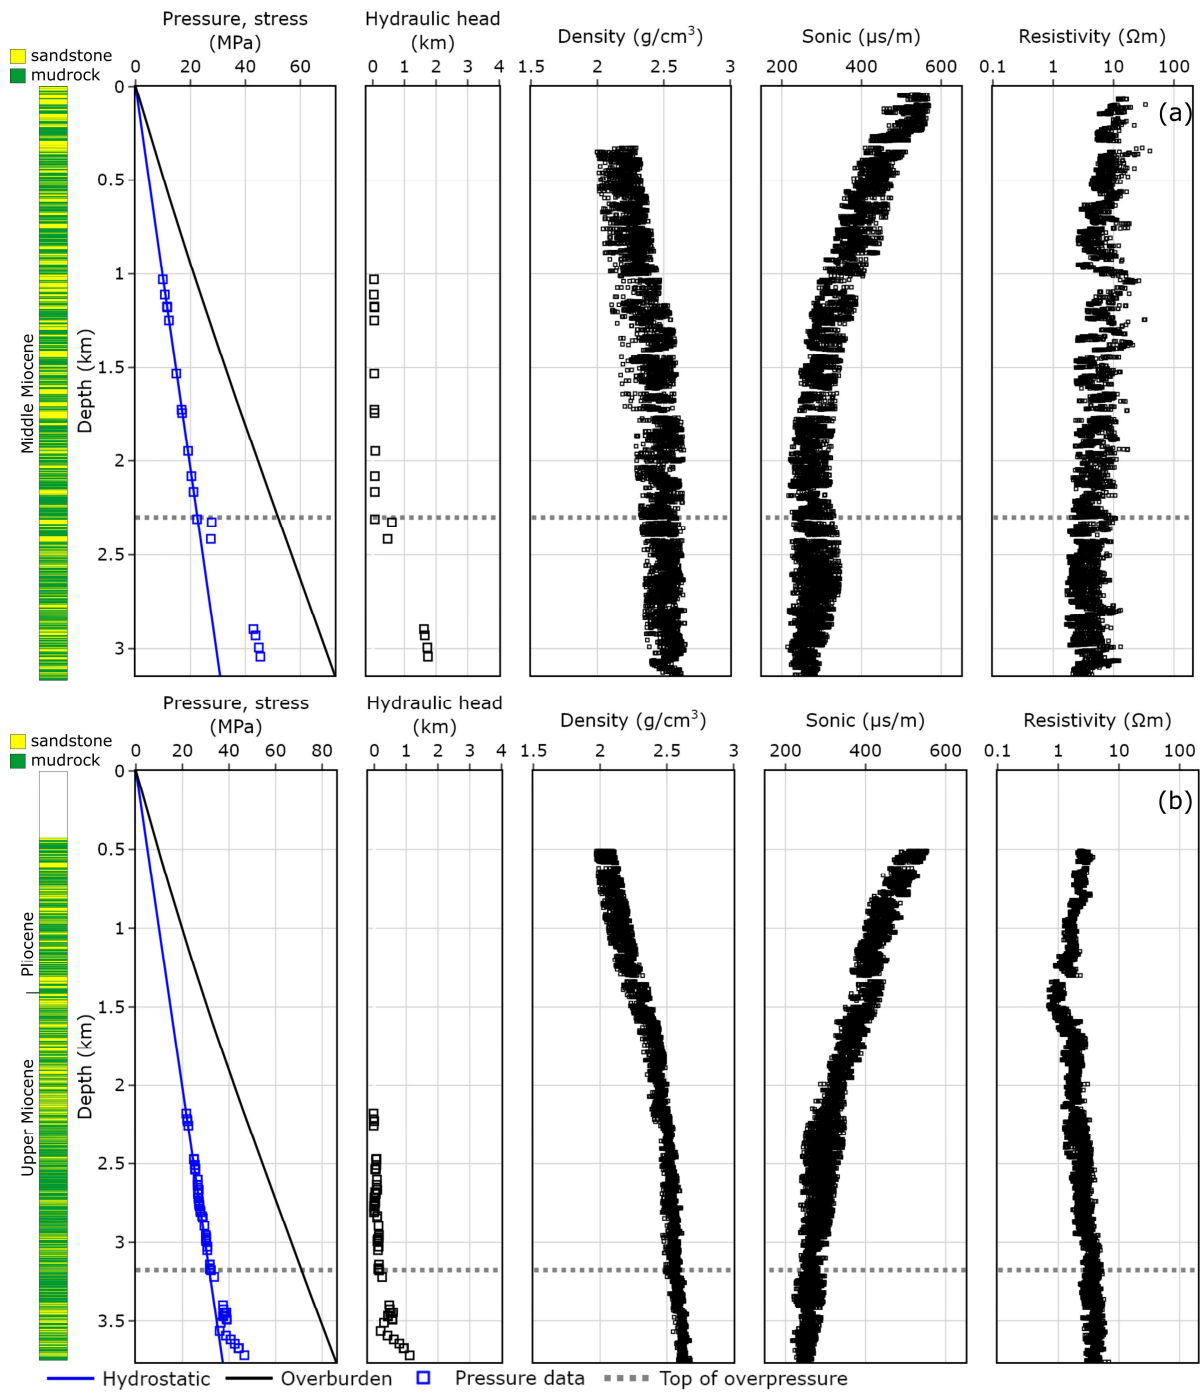

**Fig. S13** Lithology, pressure-stress depth plot, computed hydraulic head and wireline logs in mudrocks at **a** Well no. 8 and **b** Well no. 9



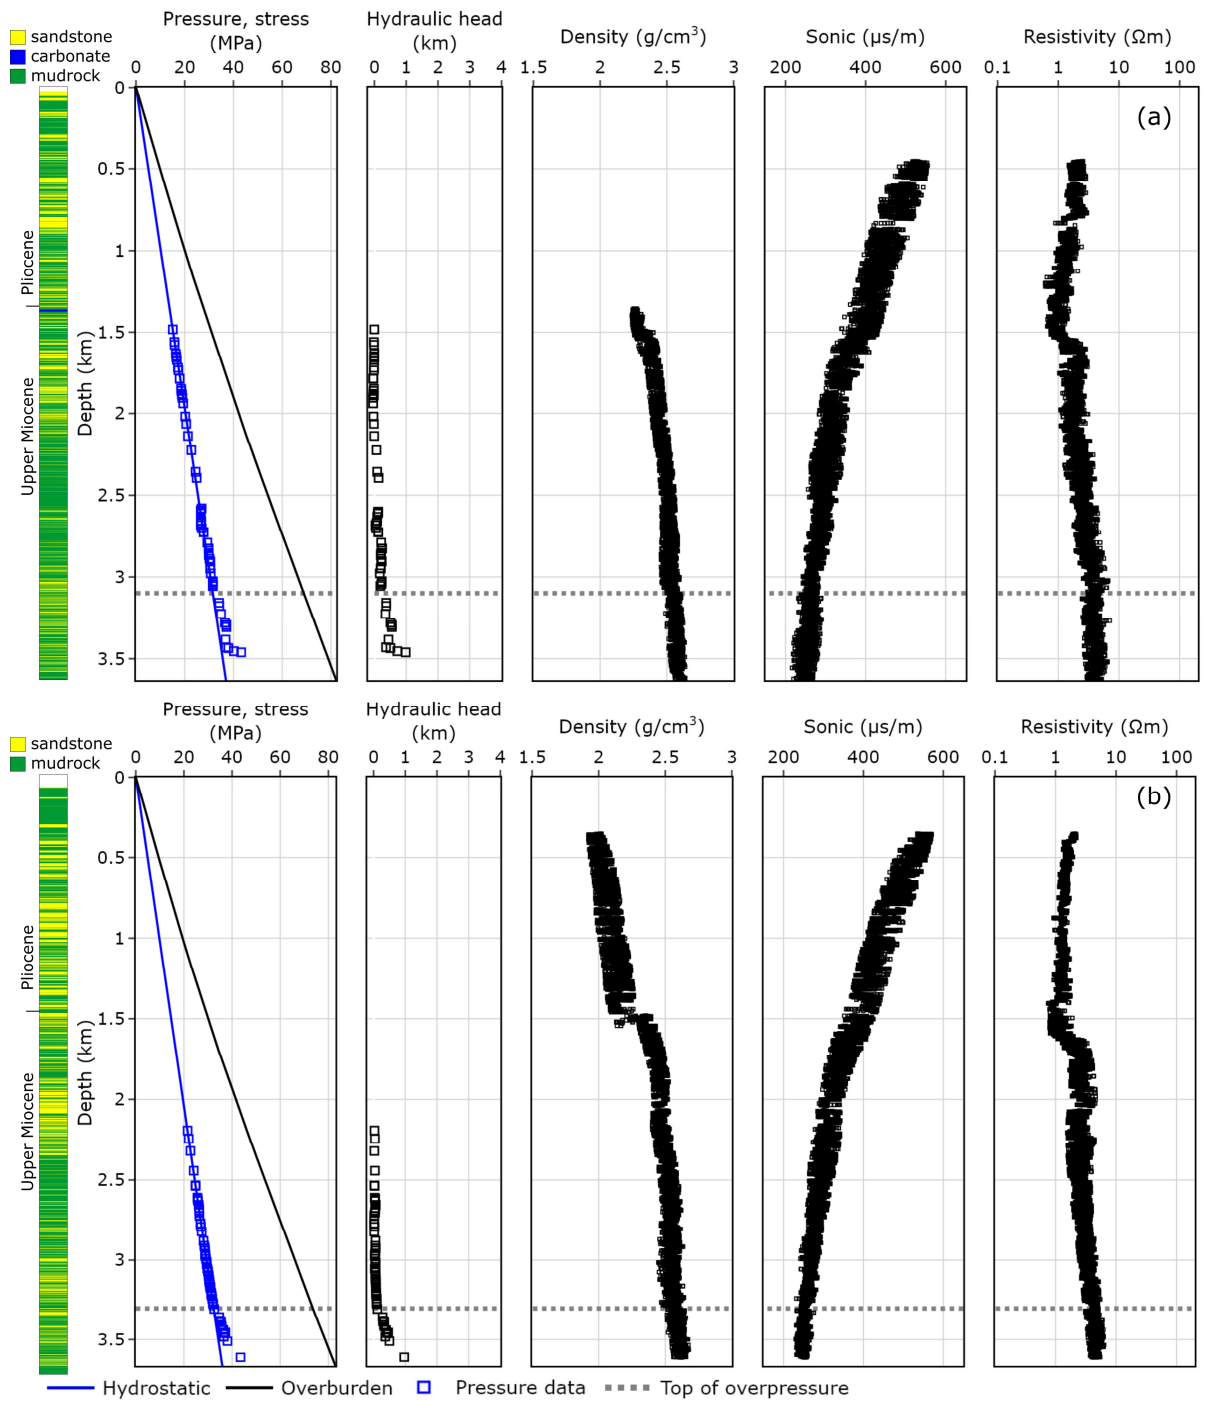

**Fig. S14** Lithology, pressure-stress depth plot, computed hydraulic head and wireline logs in mudrocks at **a** Well no. 11 and **b** Well no. 12

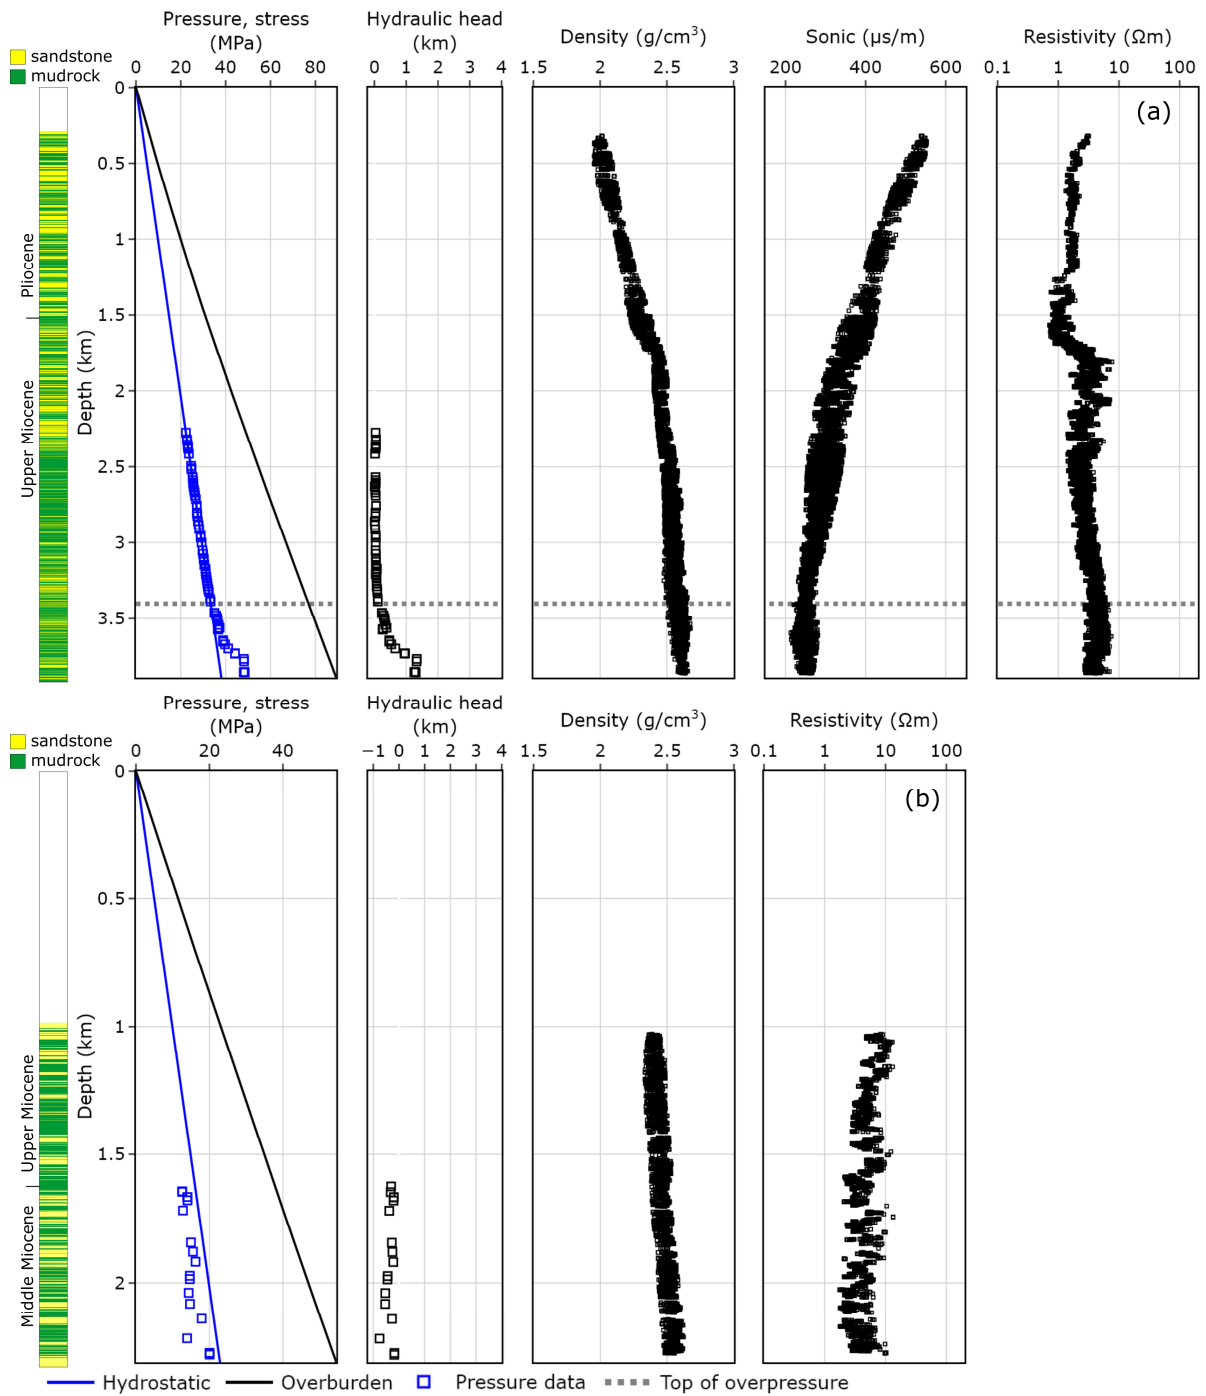

**Fig. S15** Lithology, pressure-stress depth plot, computed hydraulic head and wireline logs in mudrocks at **a** Well no. 13 and **b** Well no. 15

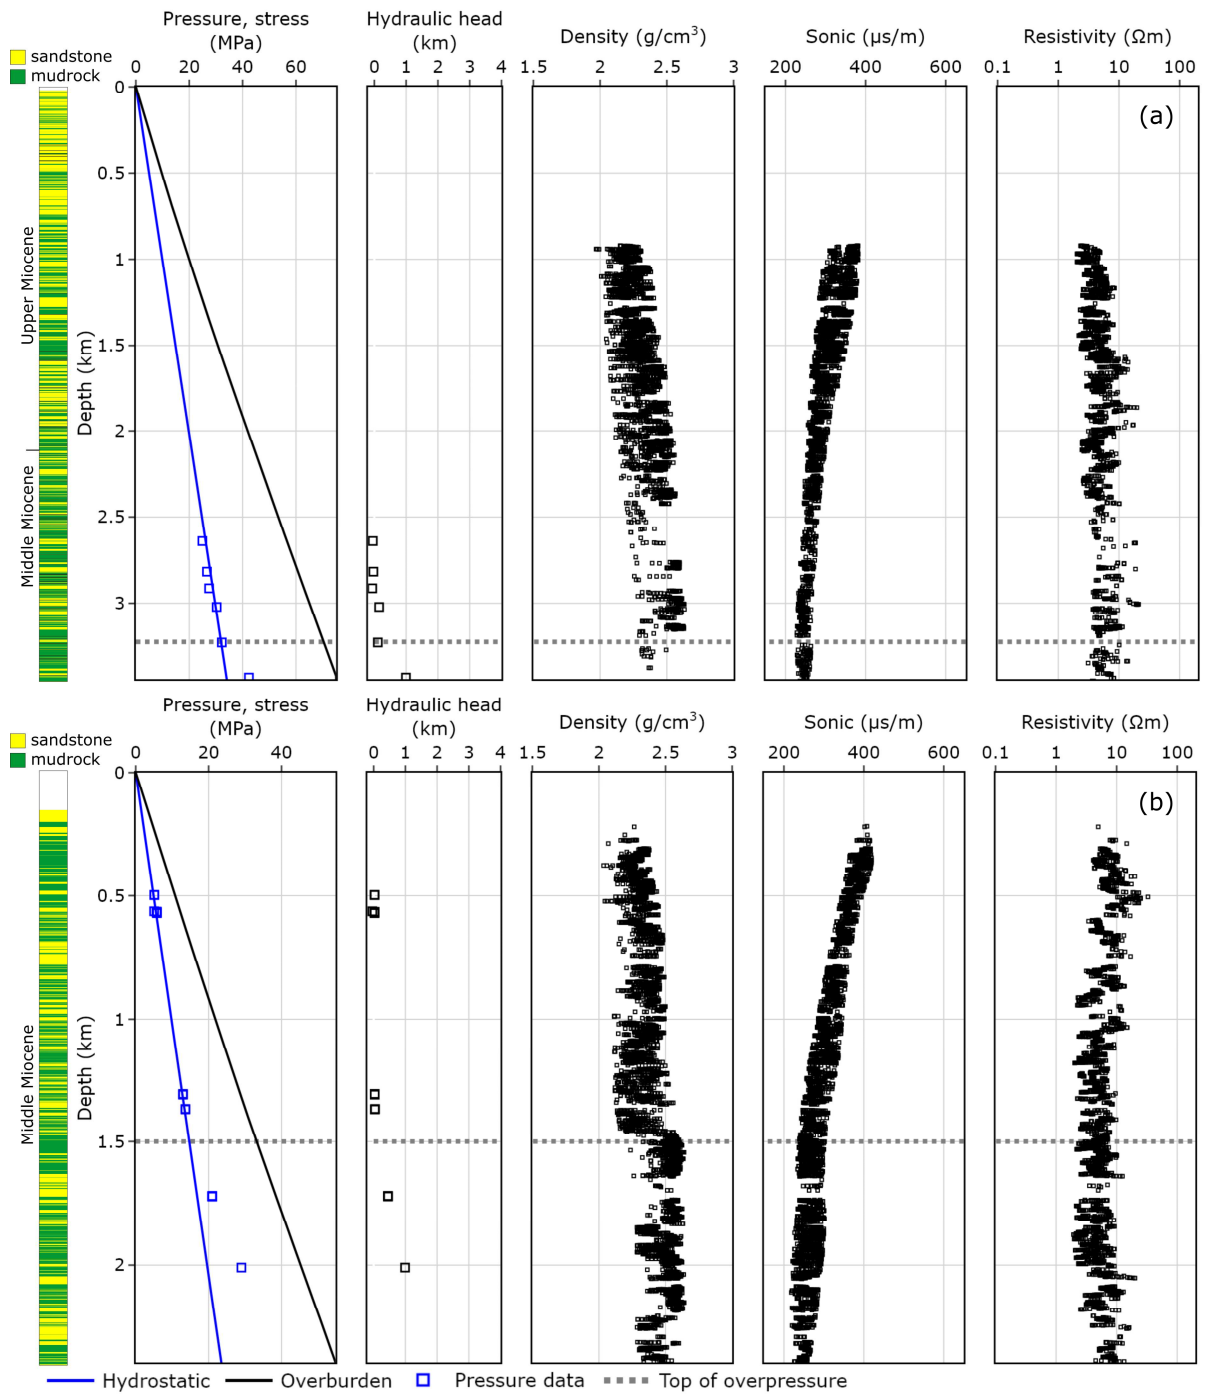

**Fig. S16** Lithology, pressure-stress depth plot, computed hydraulic head and wireline logs in mudrocks at **a** Well no. 16 and **b** Well no. 17

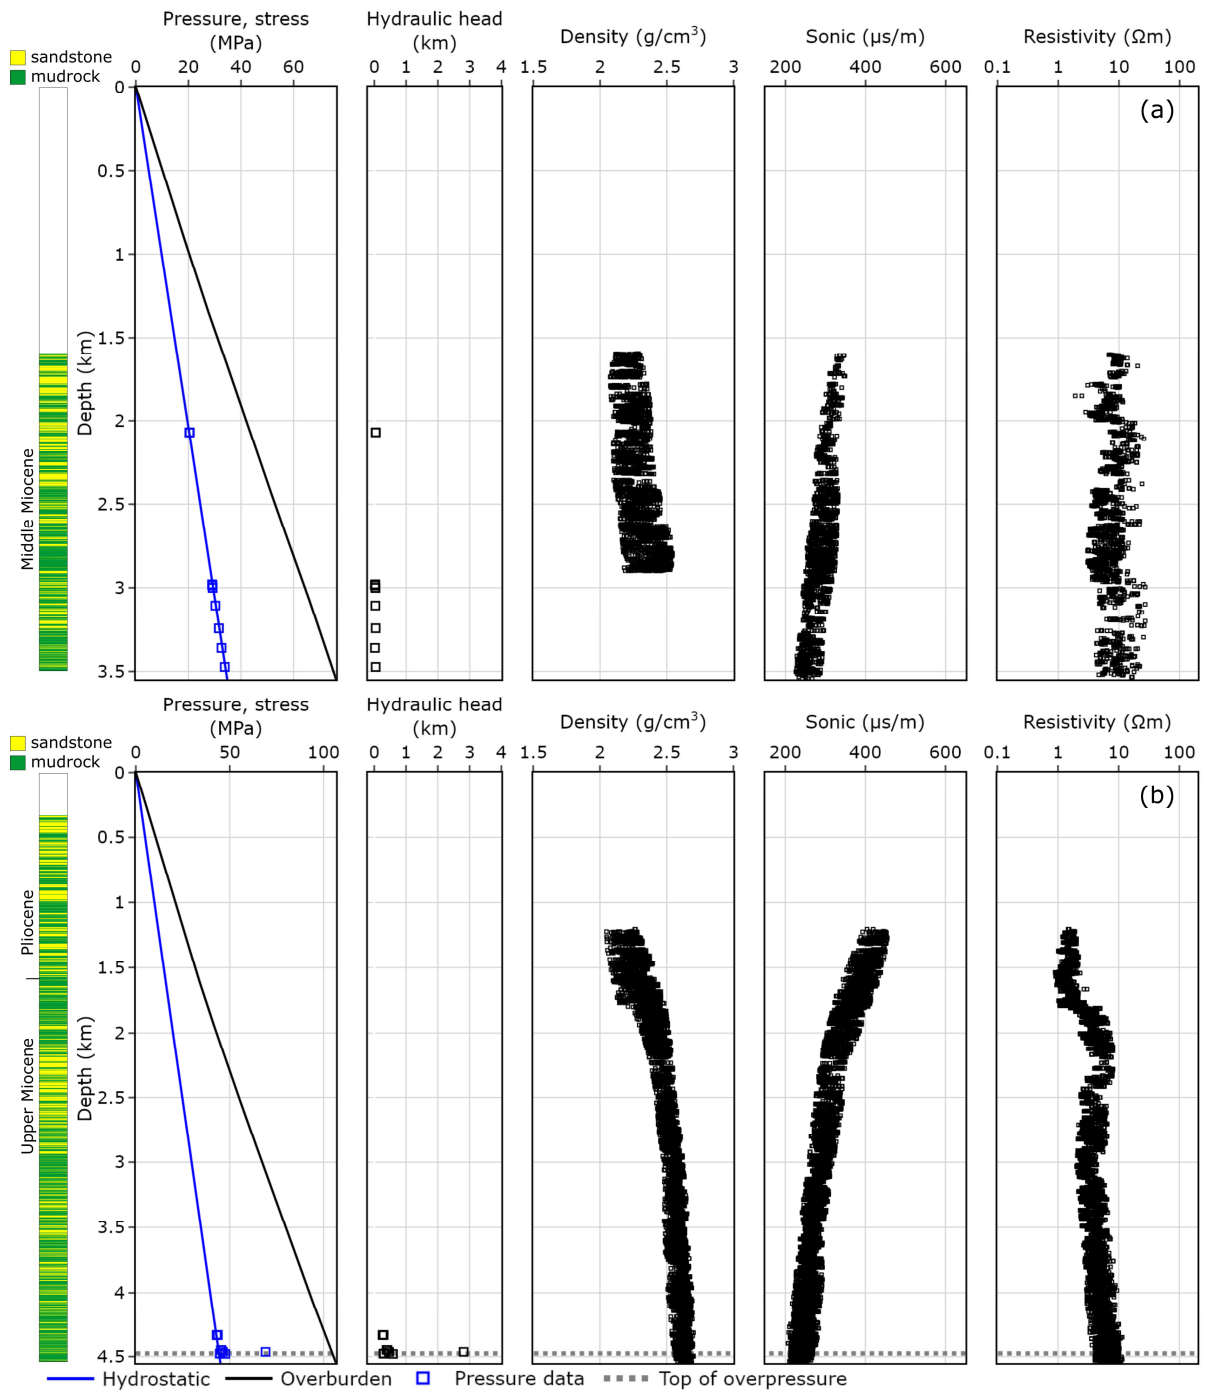

**Fig. S17** Lithology, pressure-stress depth plot, computed hydraulic head and wireline logs in mudrocks at **a** Well no. 19 and **b** Well no. 20

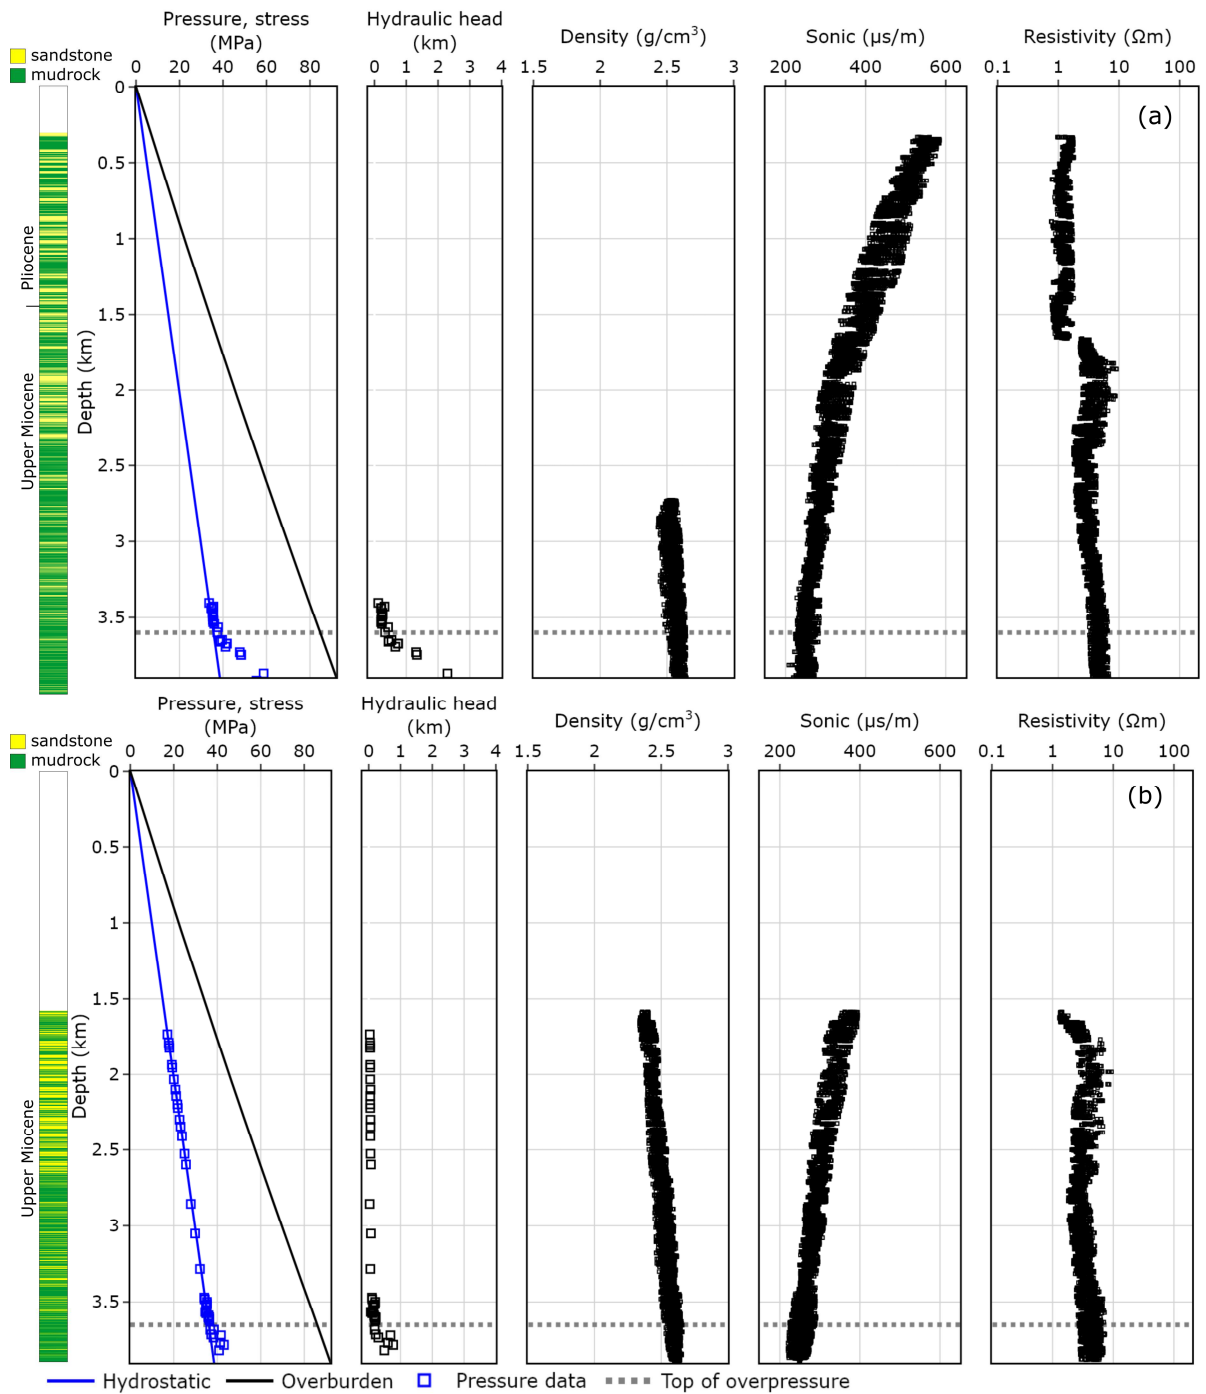

**Fig. S18** Lithology, pressure-stress depth plot, computed hydraulic head and wireline logs in mudrocks at **a** Well no. 22 and **b** Well no. 23

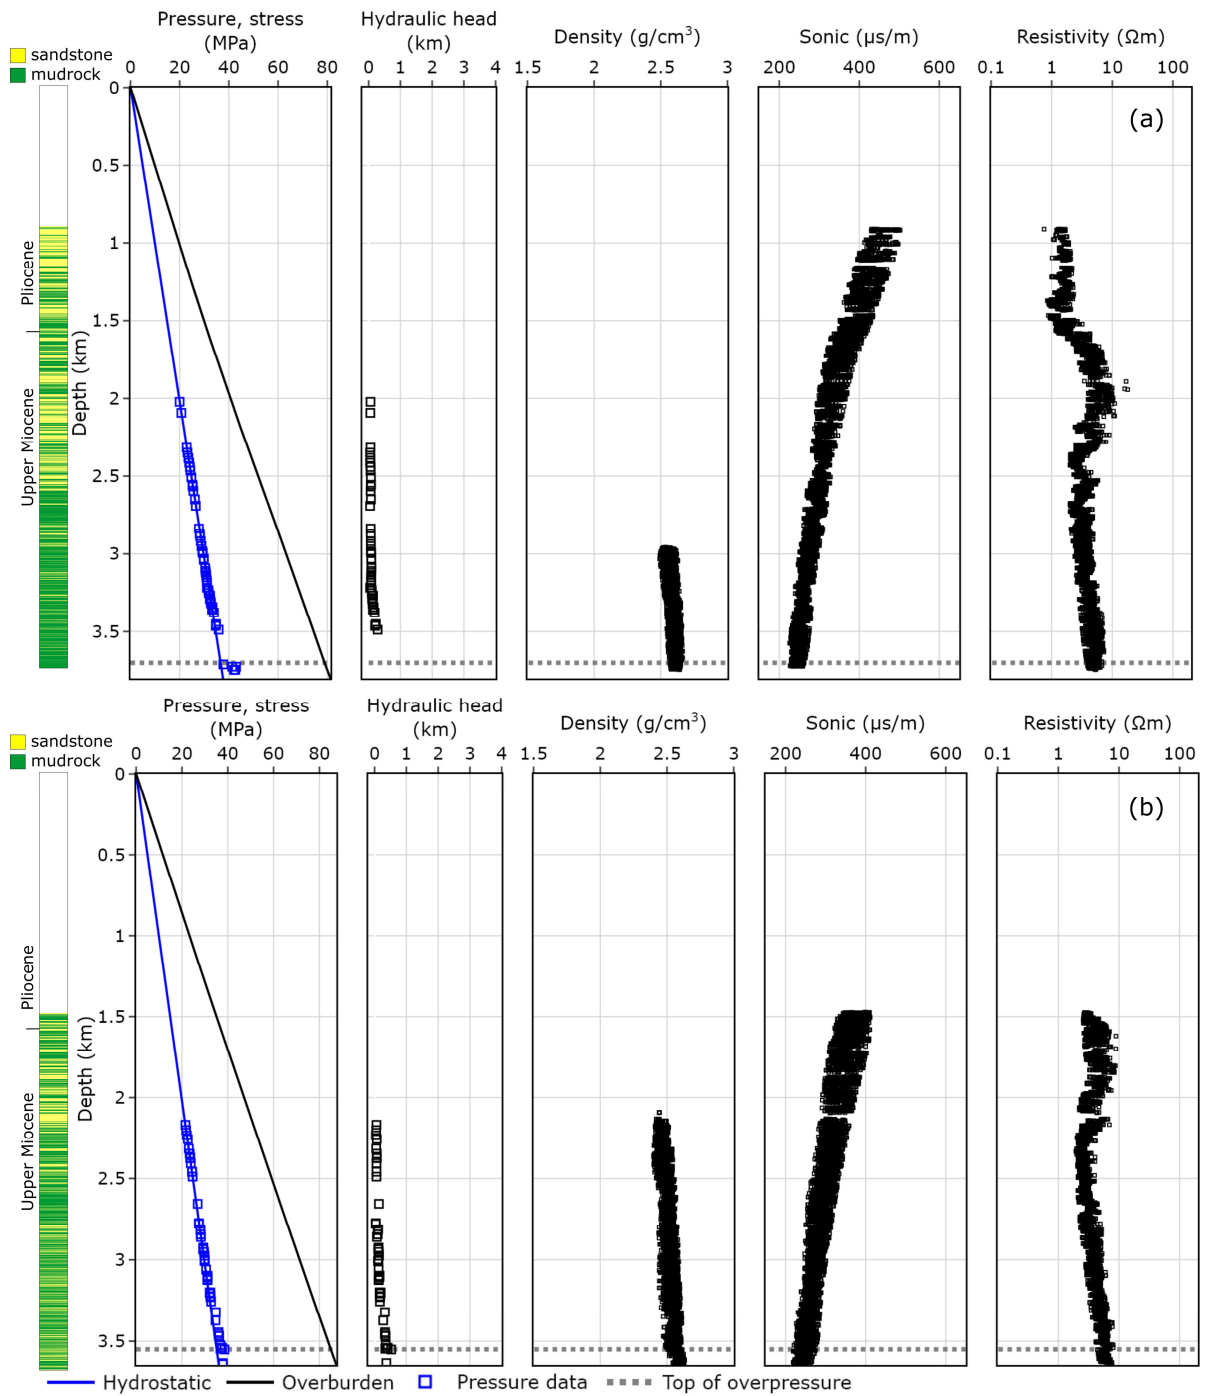

**Fig. S19** Lithology, pressure-stress depth plot, computed hydraulic head and wireline logs in mudrocks at **a** Well no. 24 and **b** Well no. 25

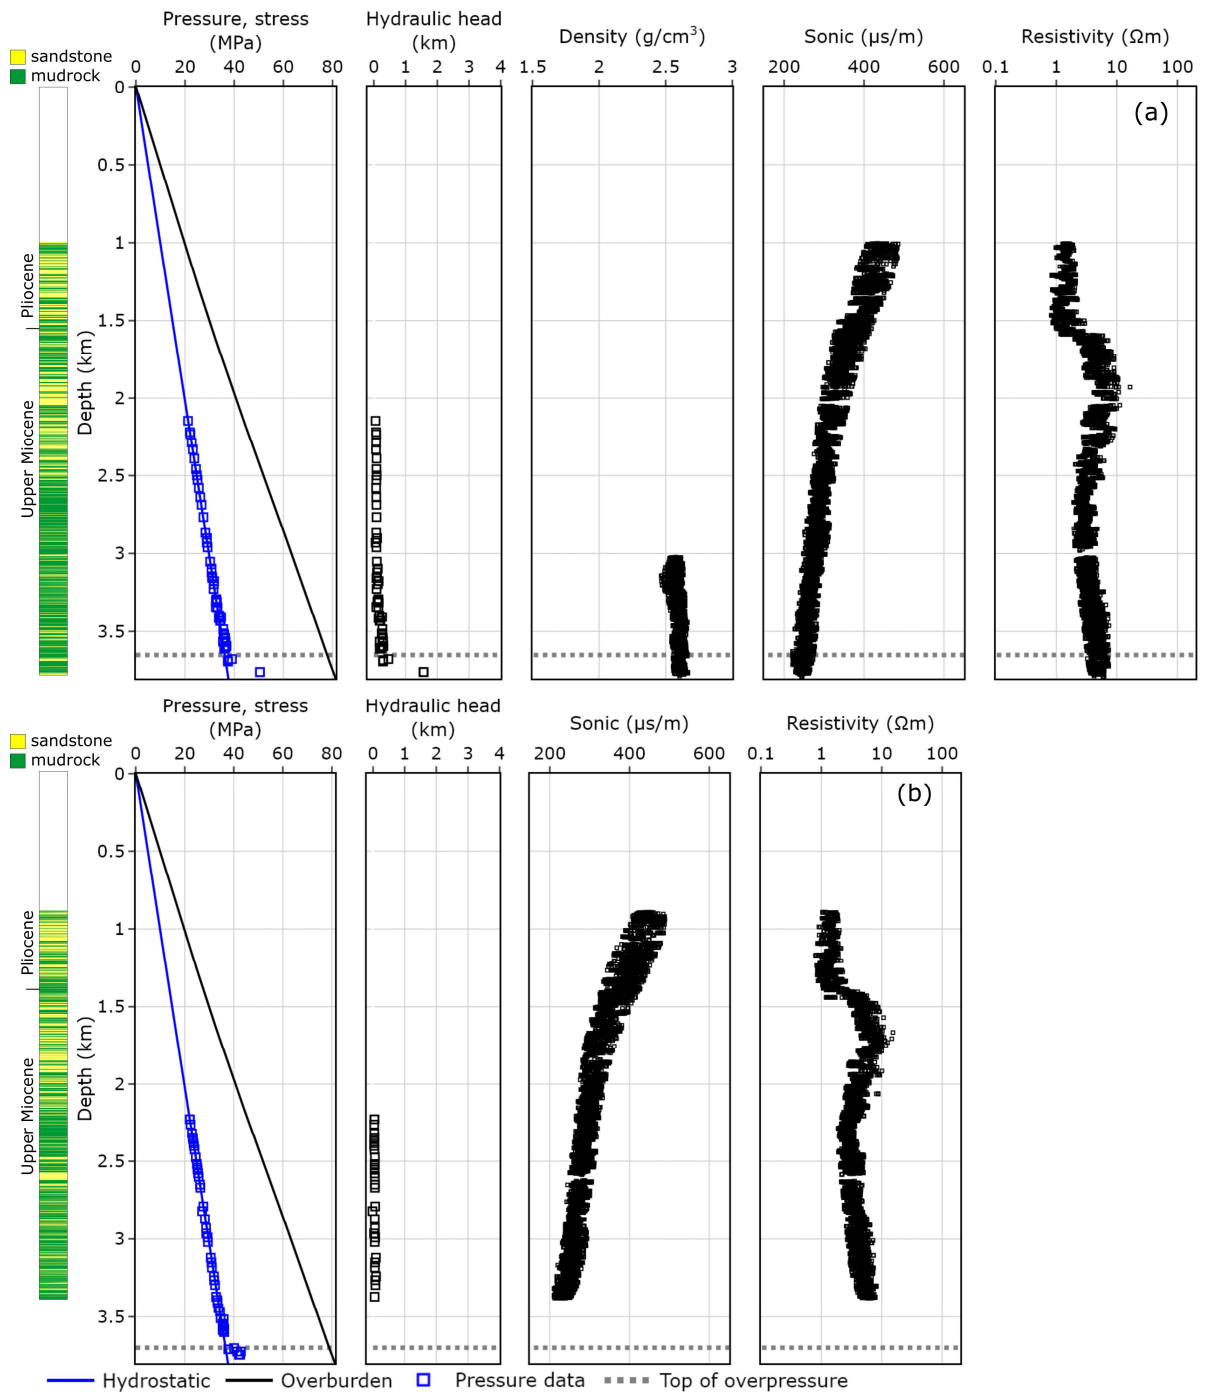

**Fig. S20** Lithology, pressure-stress depth plot, computed hydraulic head and wireline logs in mudrocks at **a** Well no. 26 and **b** Well no. 27

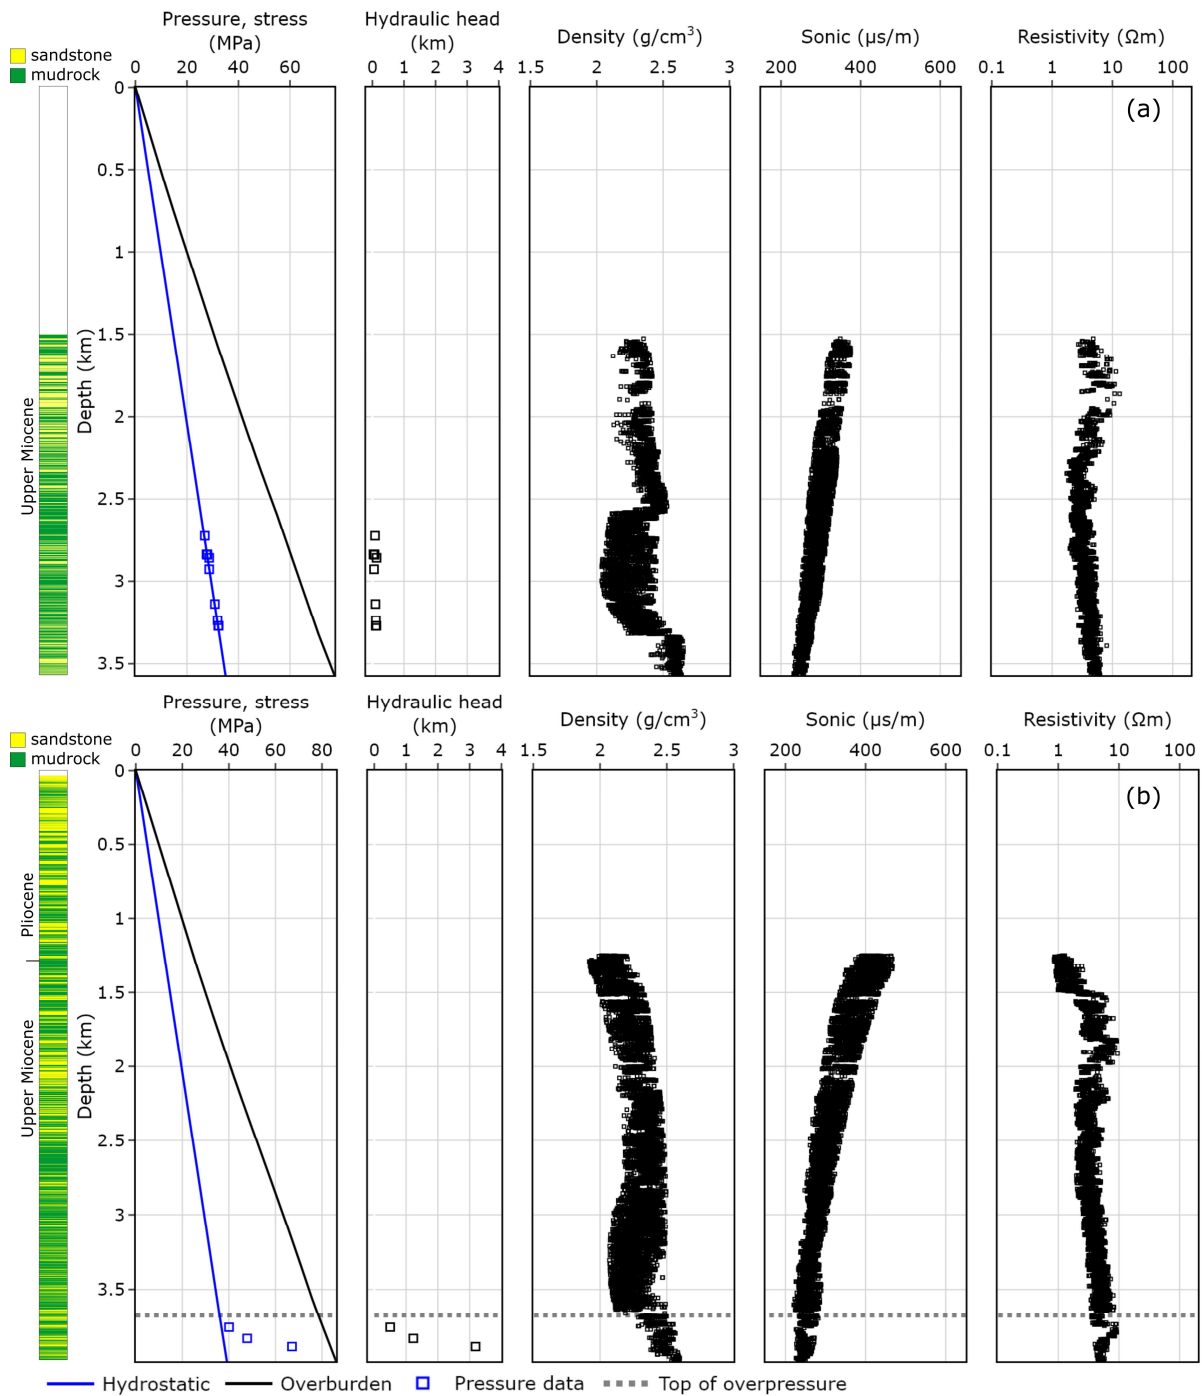

**Fig. S21** Lithology, pressure-stress depth plot, computed hydraulic head and wireline logs in mudrocks at **a** Well no. 28 and **b** Well no. 29



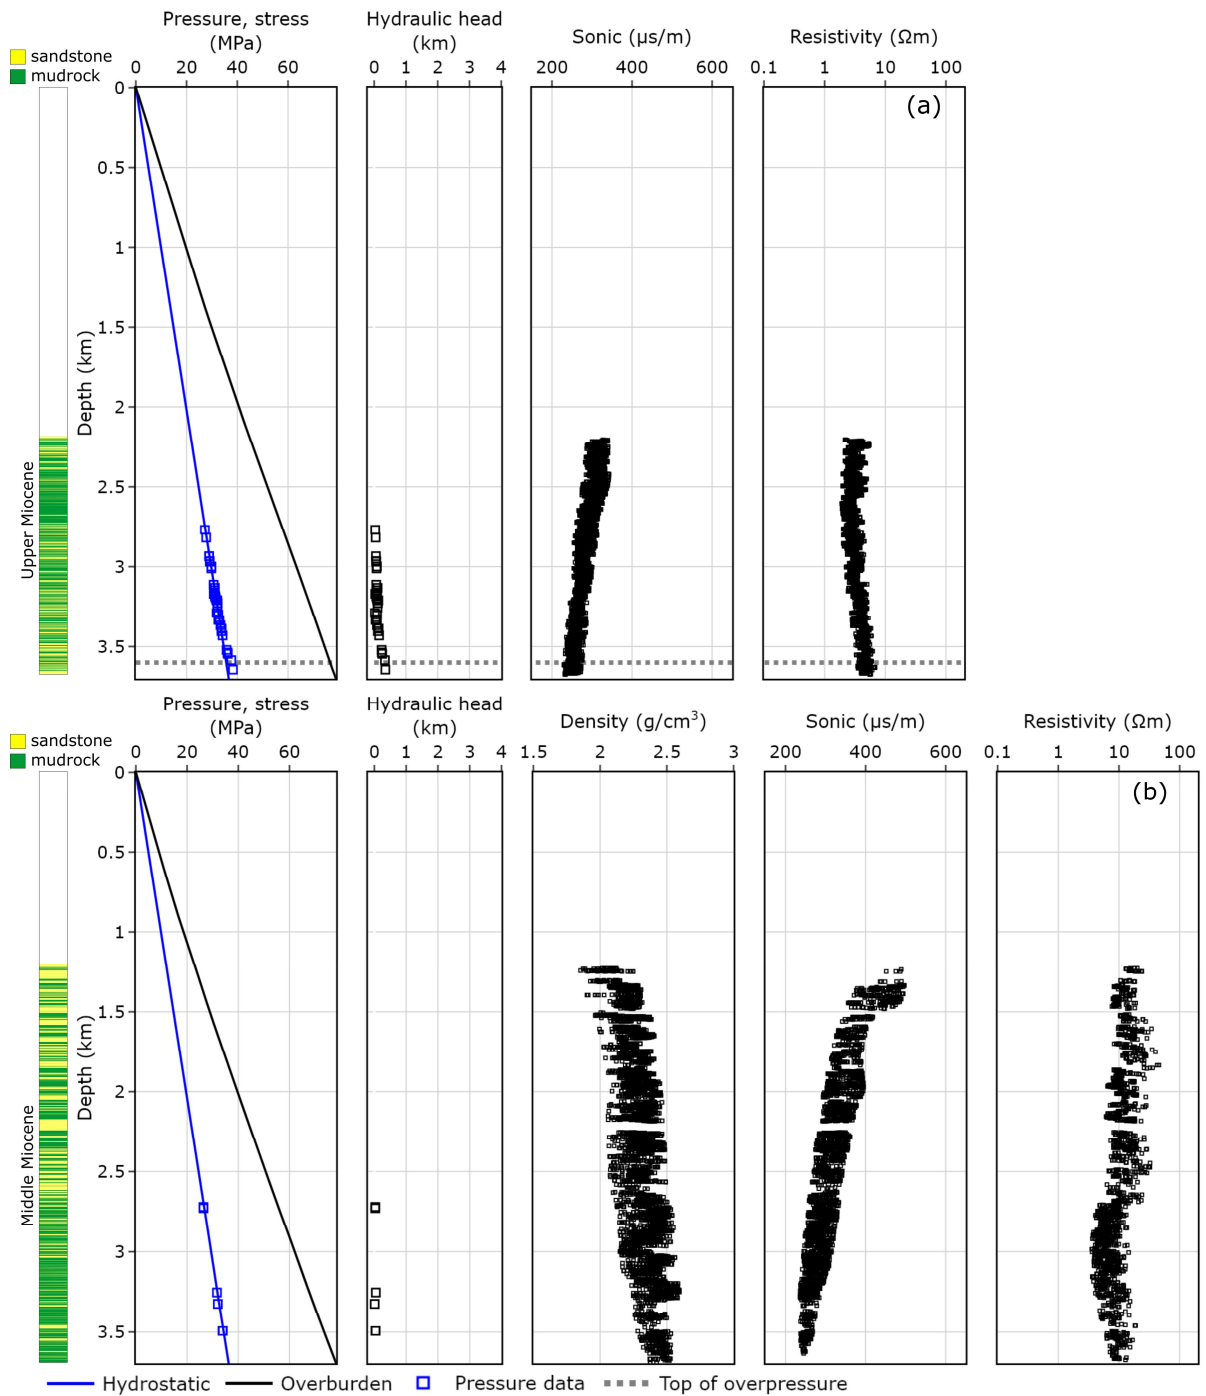

**Fig. S22** Lithology, pressure-stress depth plot, computed hydraulic head and wireline logs in mudrocks at **a** Well no. 30 and **b** Well no. 31

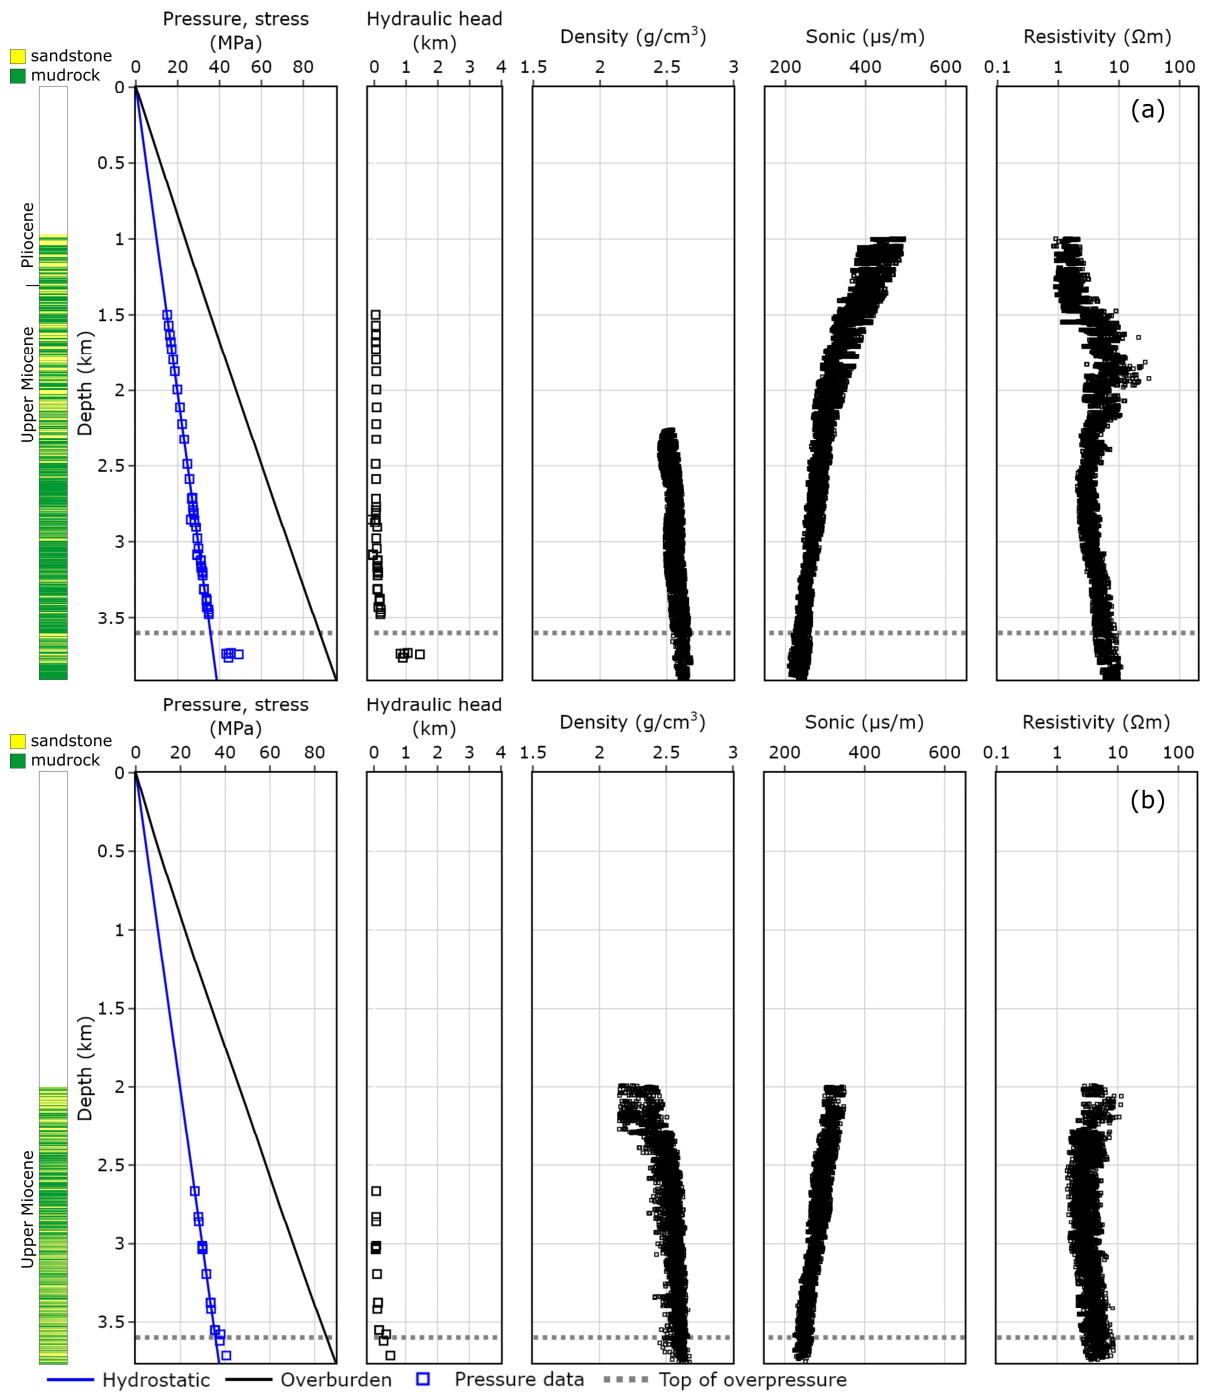

**Fig. S23** Lithology, pressure-stress depth plot, computed hydraulic head and wireline logs in mudrocks at **a** Well no. 32 and **b** Well no. 33

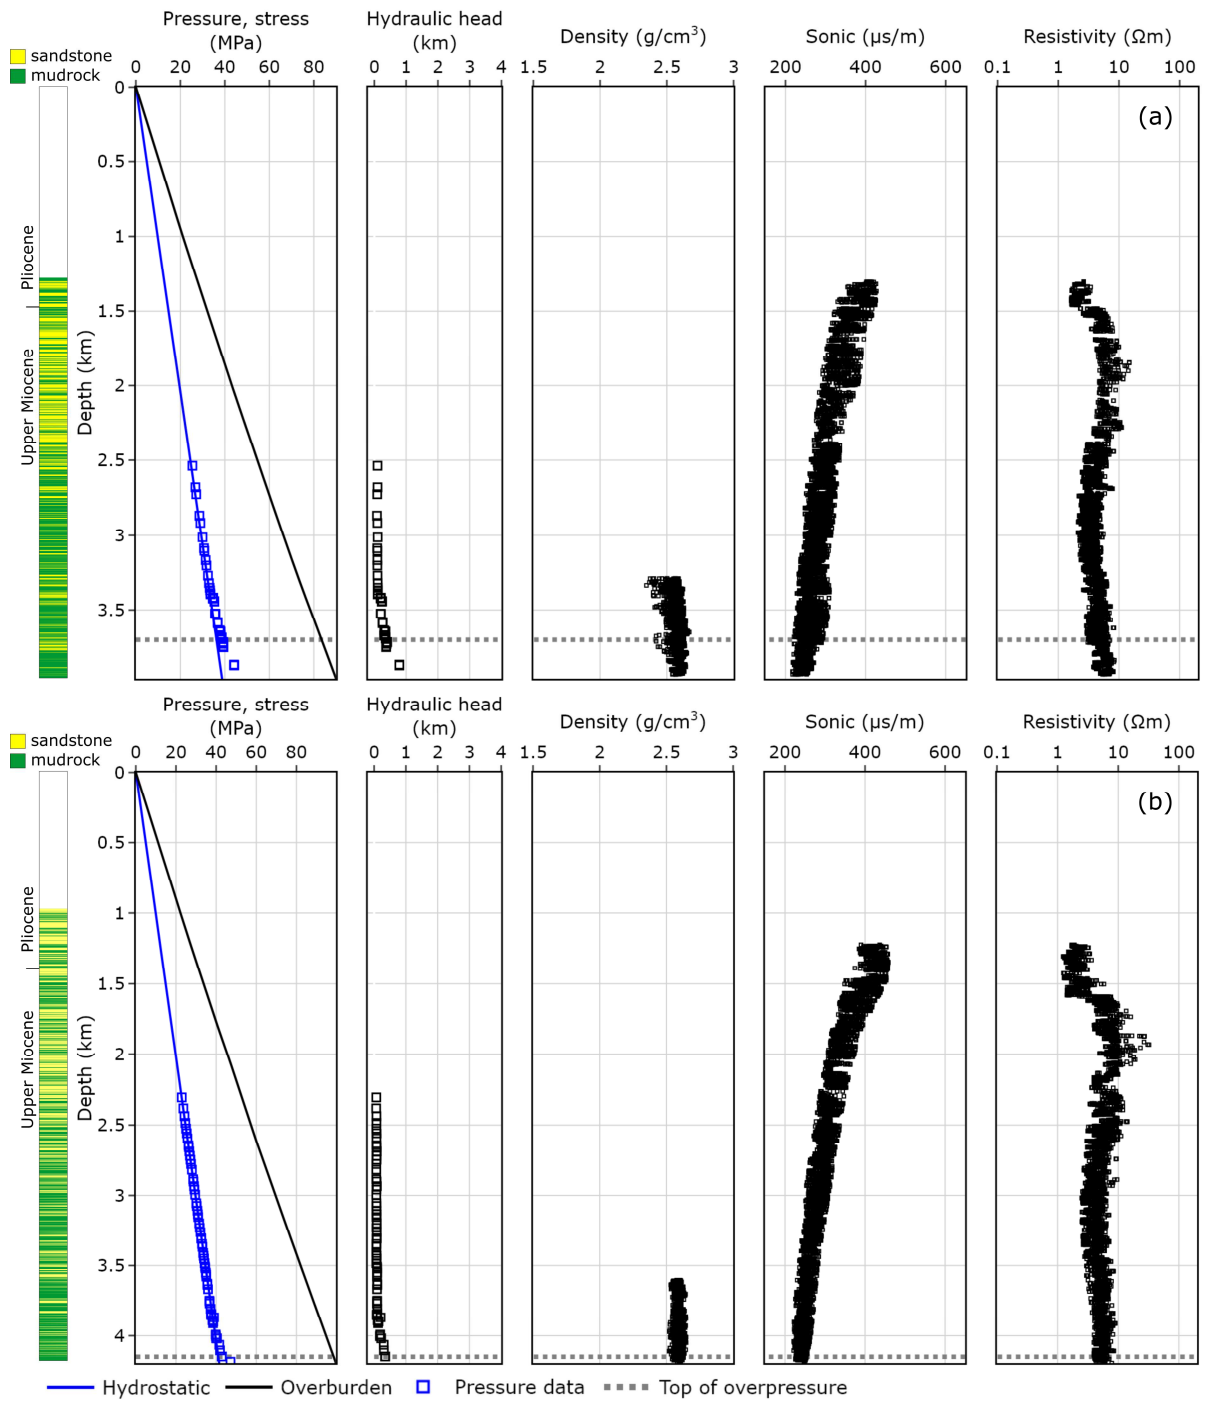

**Fig. S24** Lithology, pressure-stress depth plot, computed hydraulic head and wireline logs in mudrocks at **a** Well no. 34 and **b** Well no. 35

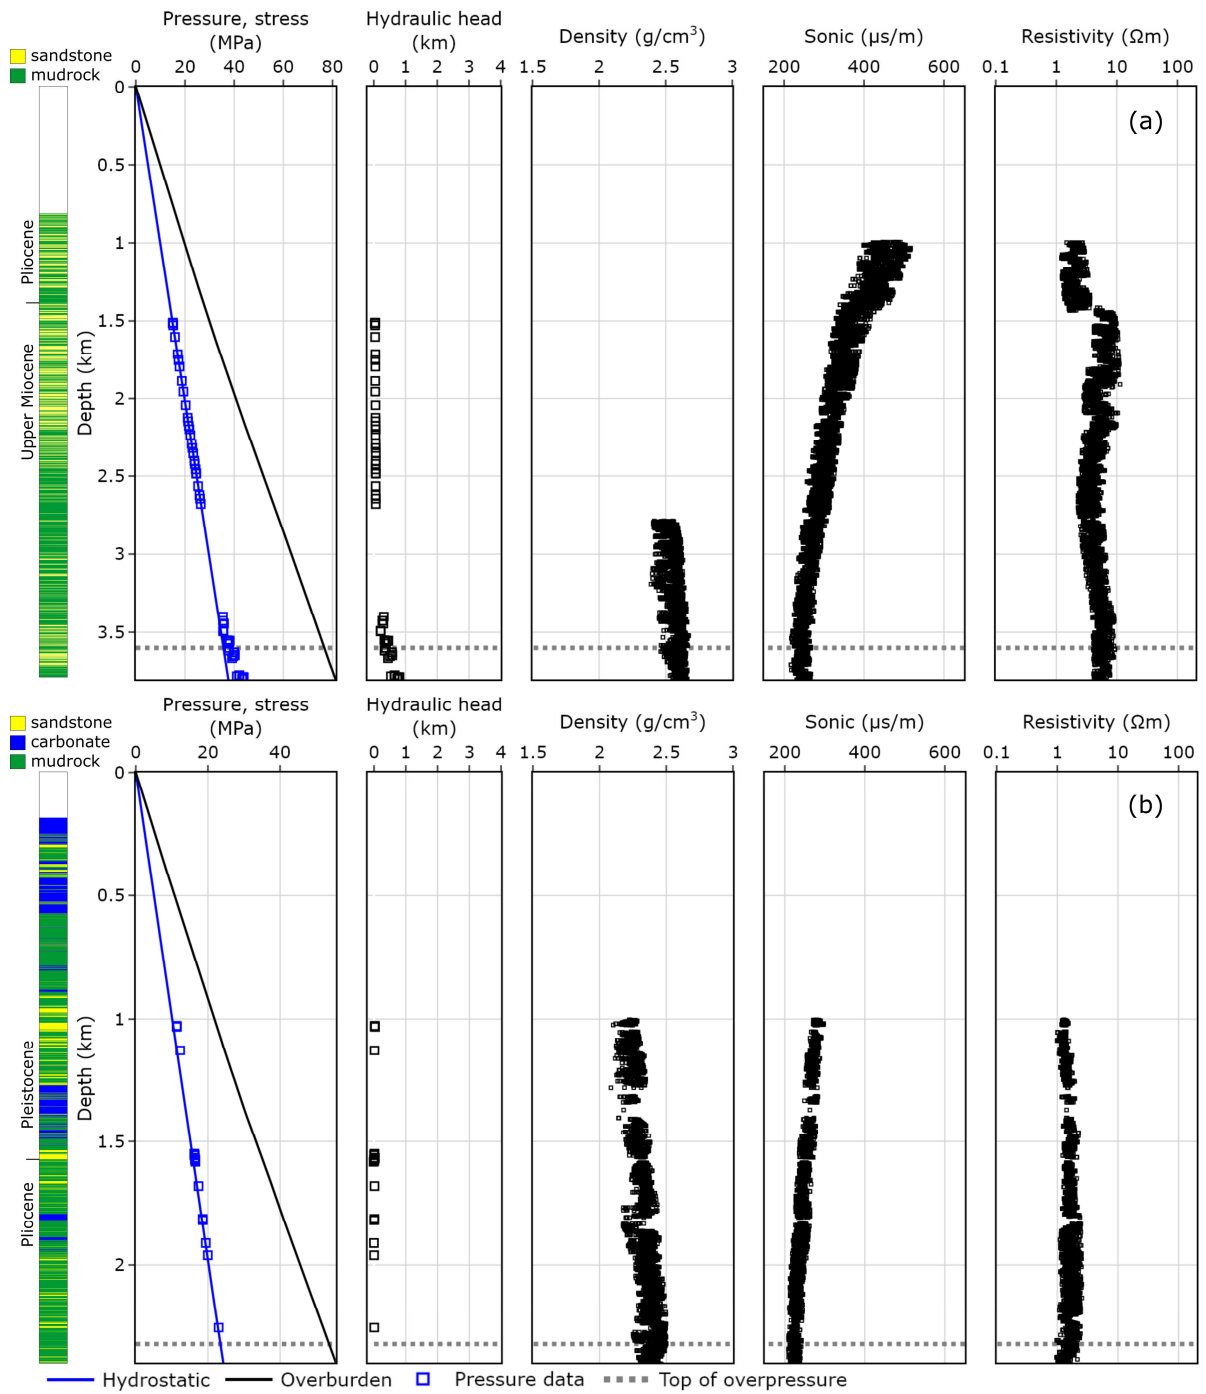

**Fig. S25** Lithology, pressure-stress depth plot, computed hydraulic head and wireline logs in mudrocks at **a** Well no. 37 and **b** Well no. 38

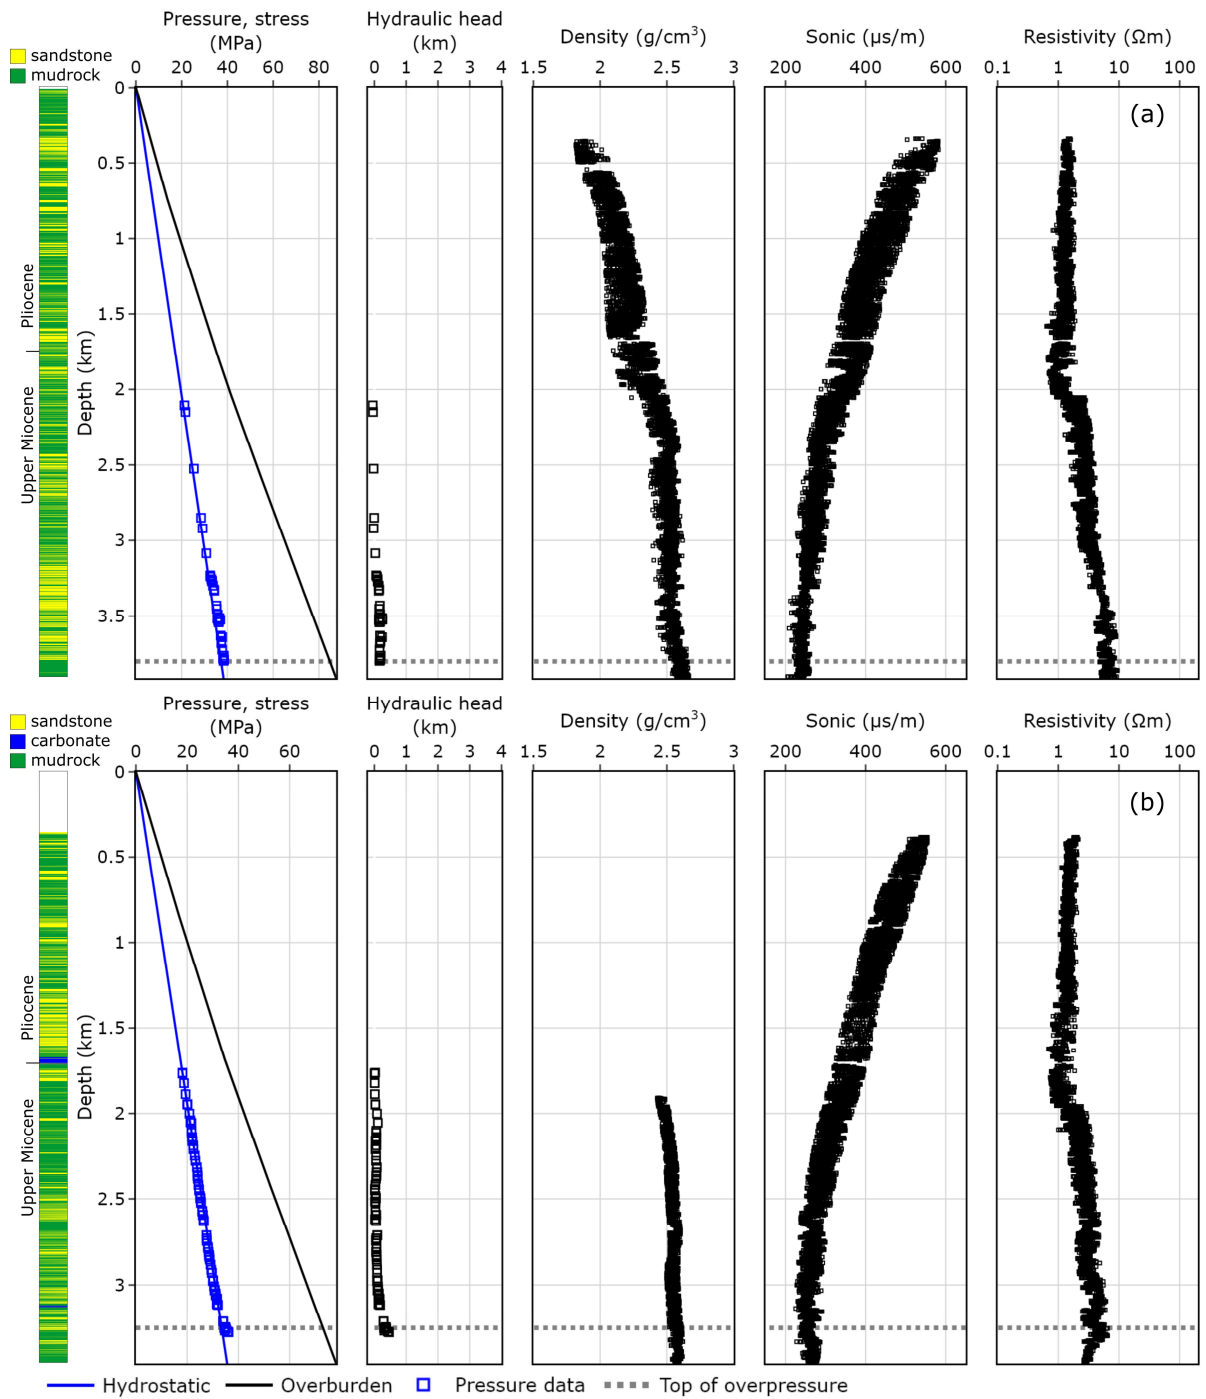

**Fig. S26** Lithology, pressure-stress depth plot, computed hydraulic head and wireline logs in mudrocks at **a** Well no. 39 and **b** Well no. 40

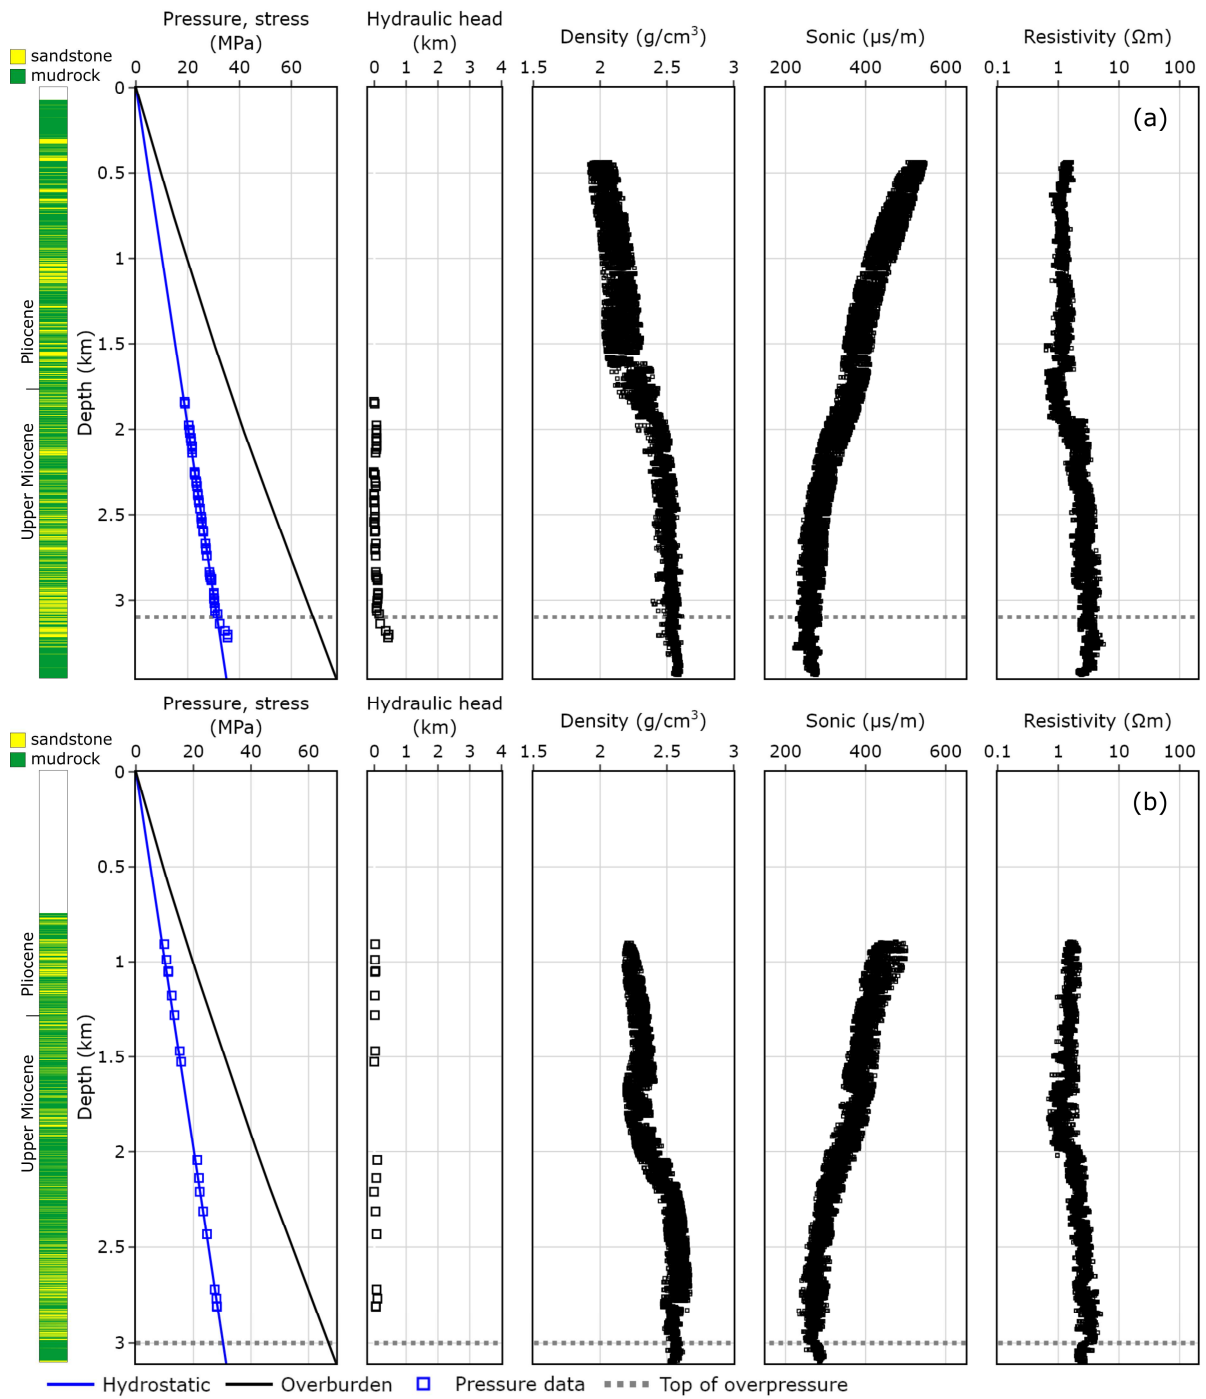

**Fig. S27** Lithology, pressure-stress depth plot, computed hydraulic head and wireline logs in mudrocks at **a** Well no. 41 and **b** Well no. 42

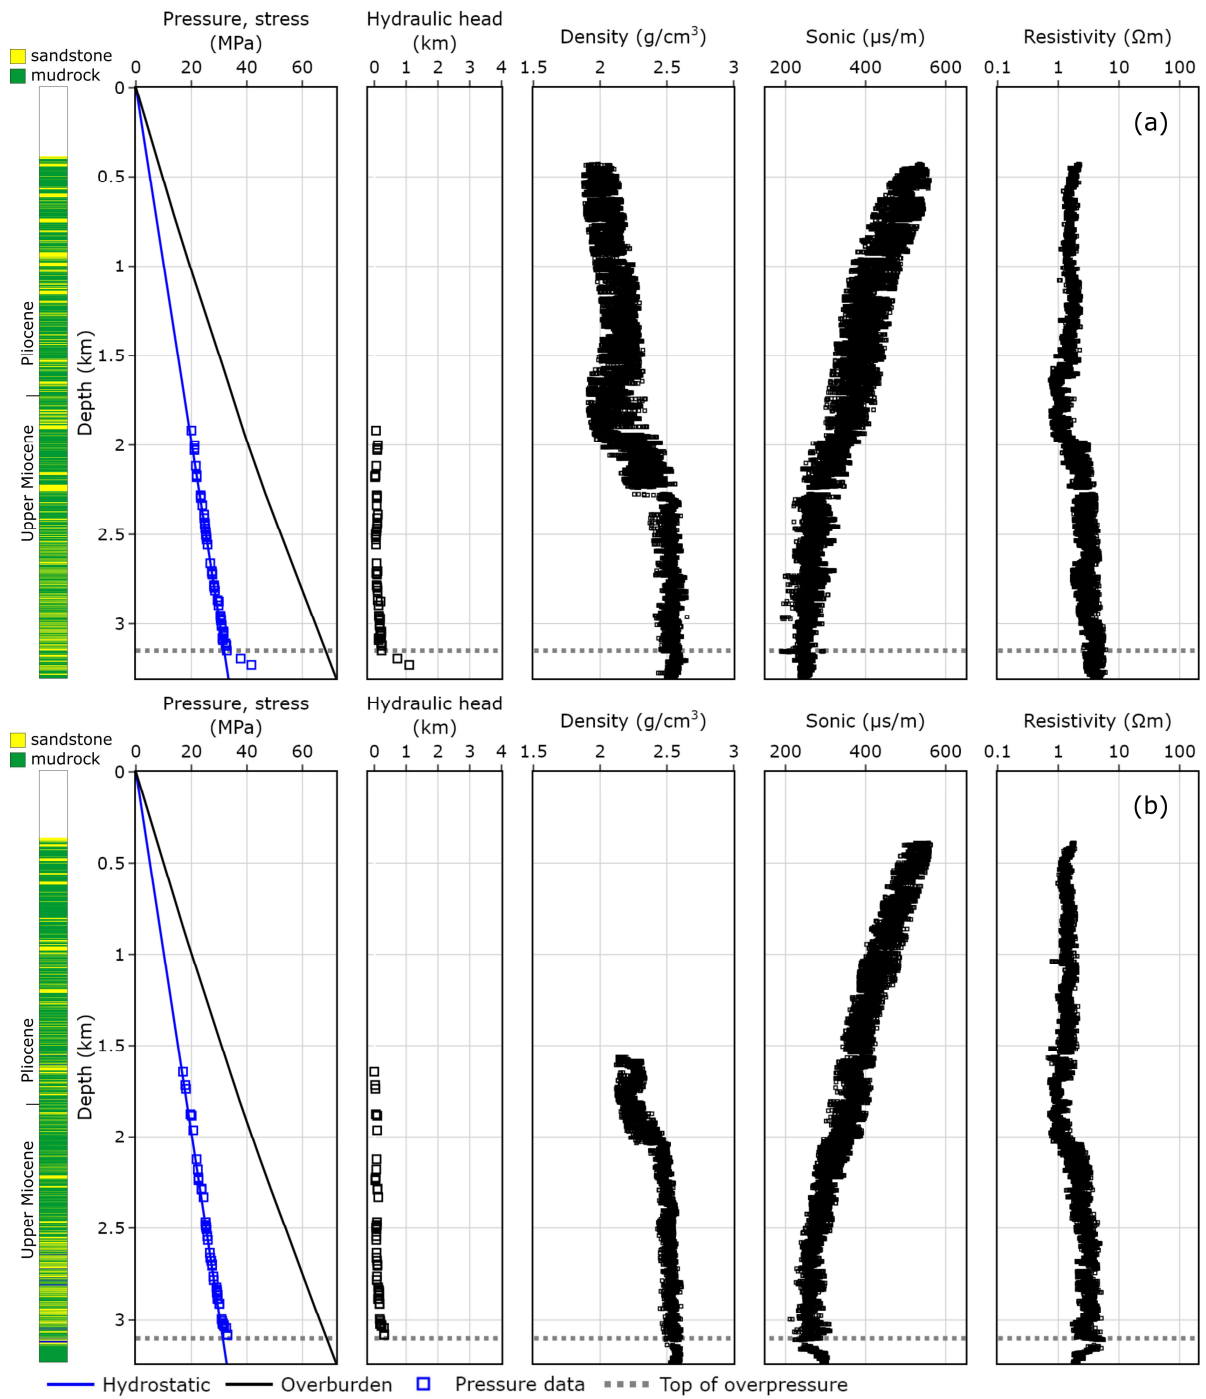

**Fig. S28** Lithology, pressure-stress depth plot, computed hydraulic head and wireline logs in mudrocks at **a** Well no. 43 and **b** Well no. 44

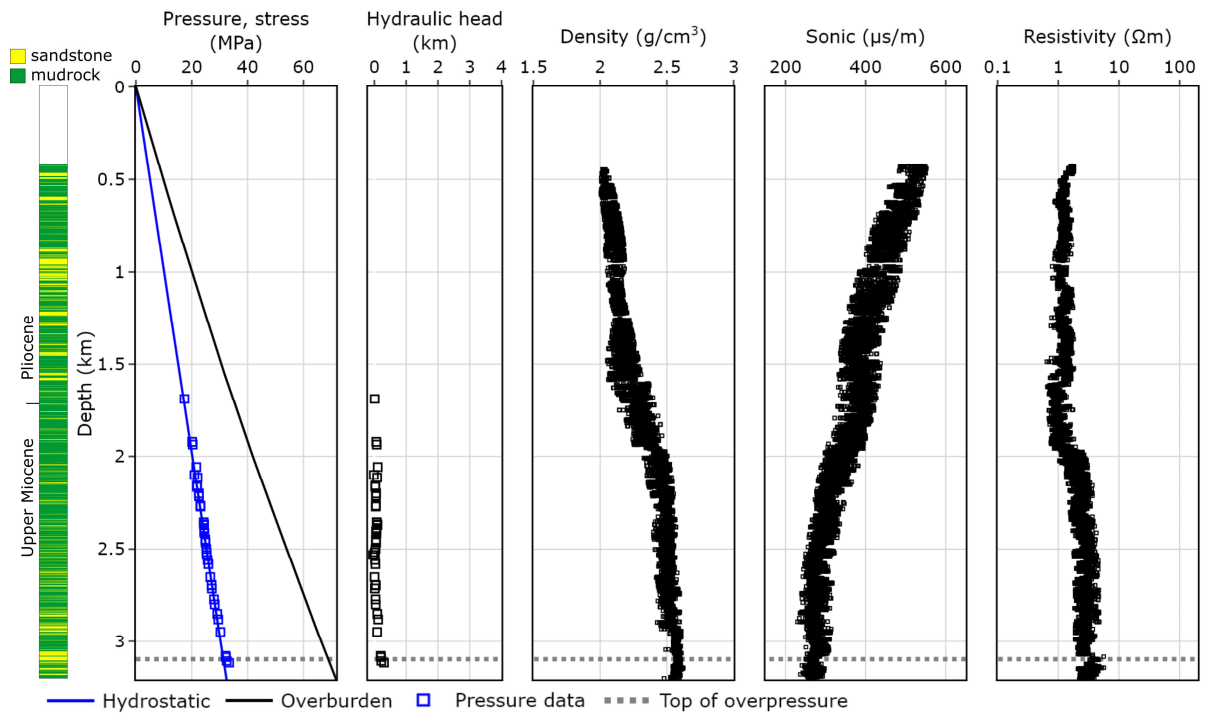

**Fig. S29** Lithology, pressure-stress depth plot, computed hydraulic head and wireline logs in mudrocks at Well no. 45

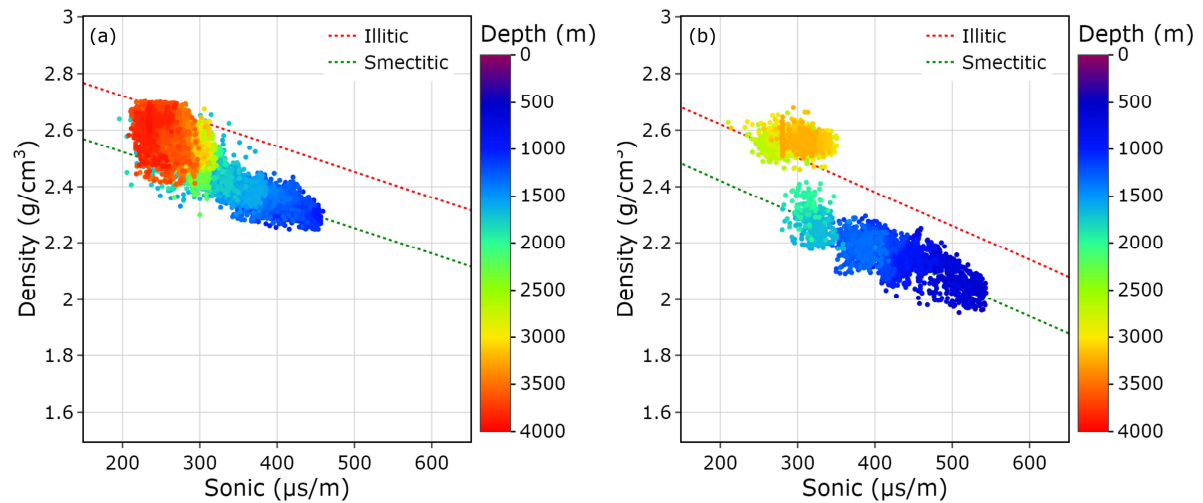

**Fig. S30** Sonic-density cross plot of mudrocks at **a** Well no. 4 and **b** Well no. 5



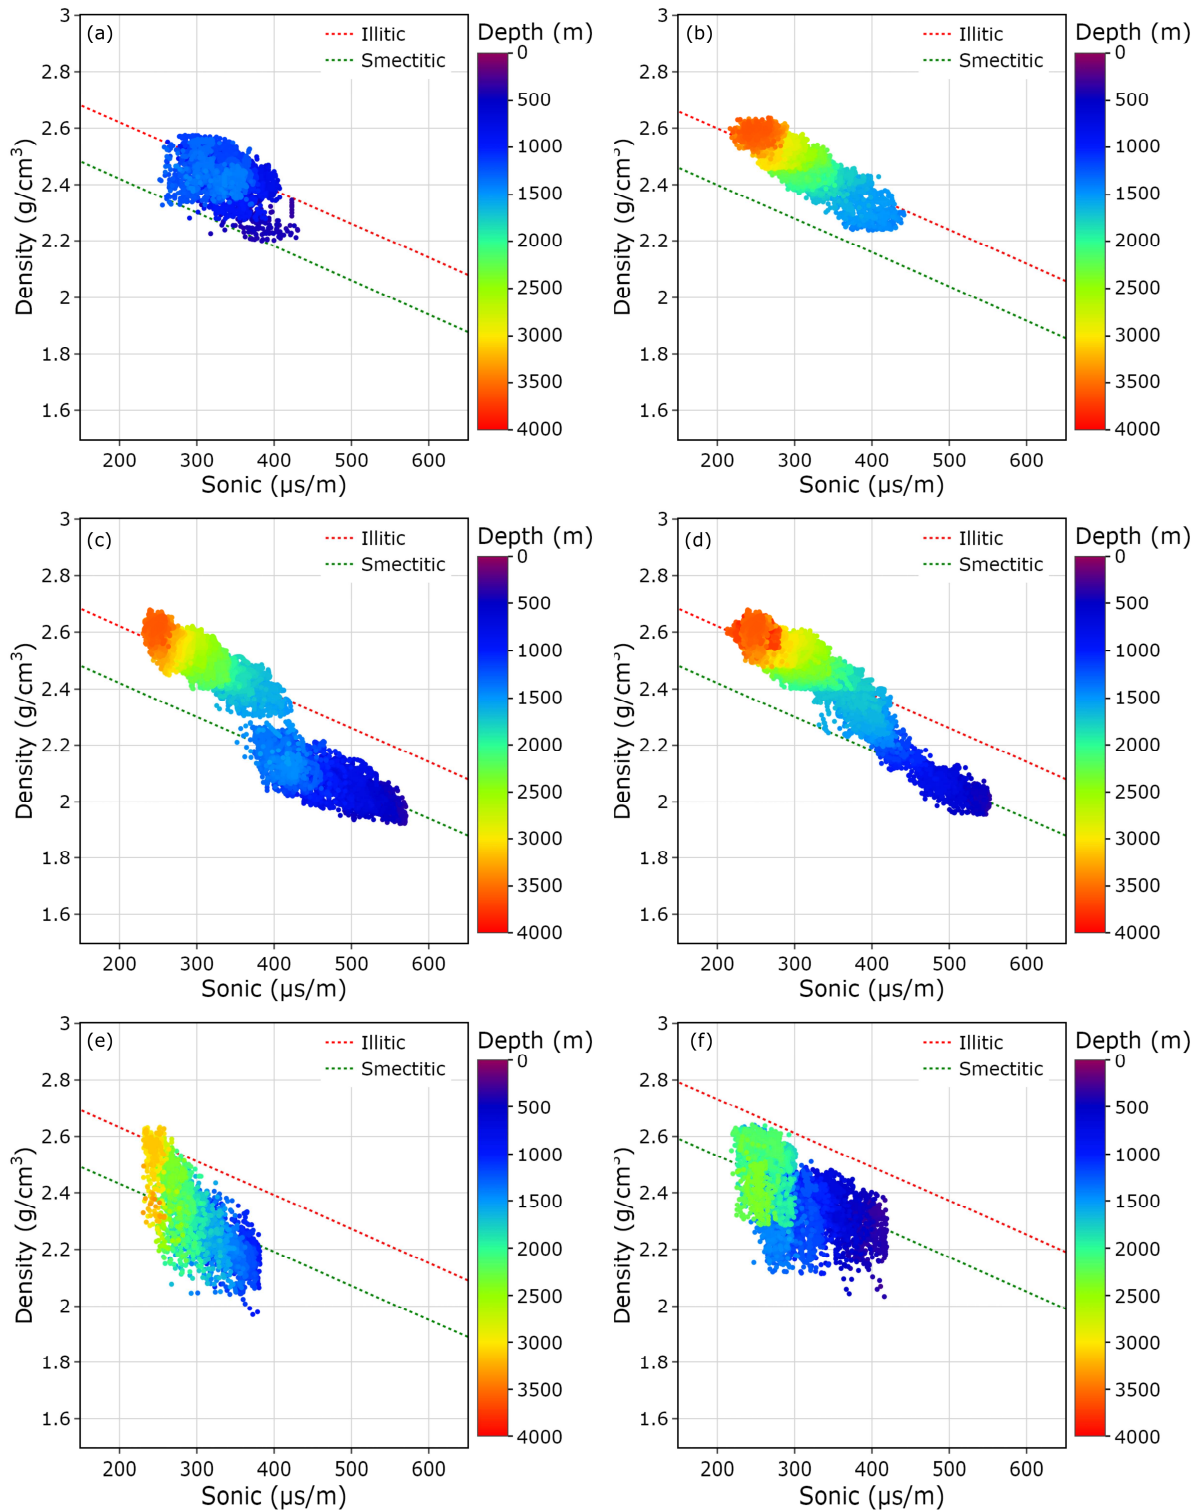

**Fig. S31** Sonic-density cross plot of mudrocks at **a** Well no. 7, **b** Well no. 11, **c** Well no. 12, **d** Well no. 13, **e** Well no. 16, and **f** Well no. 17

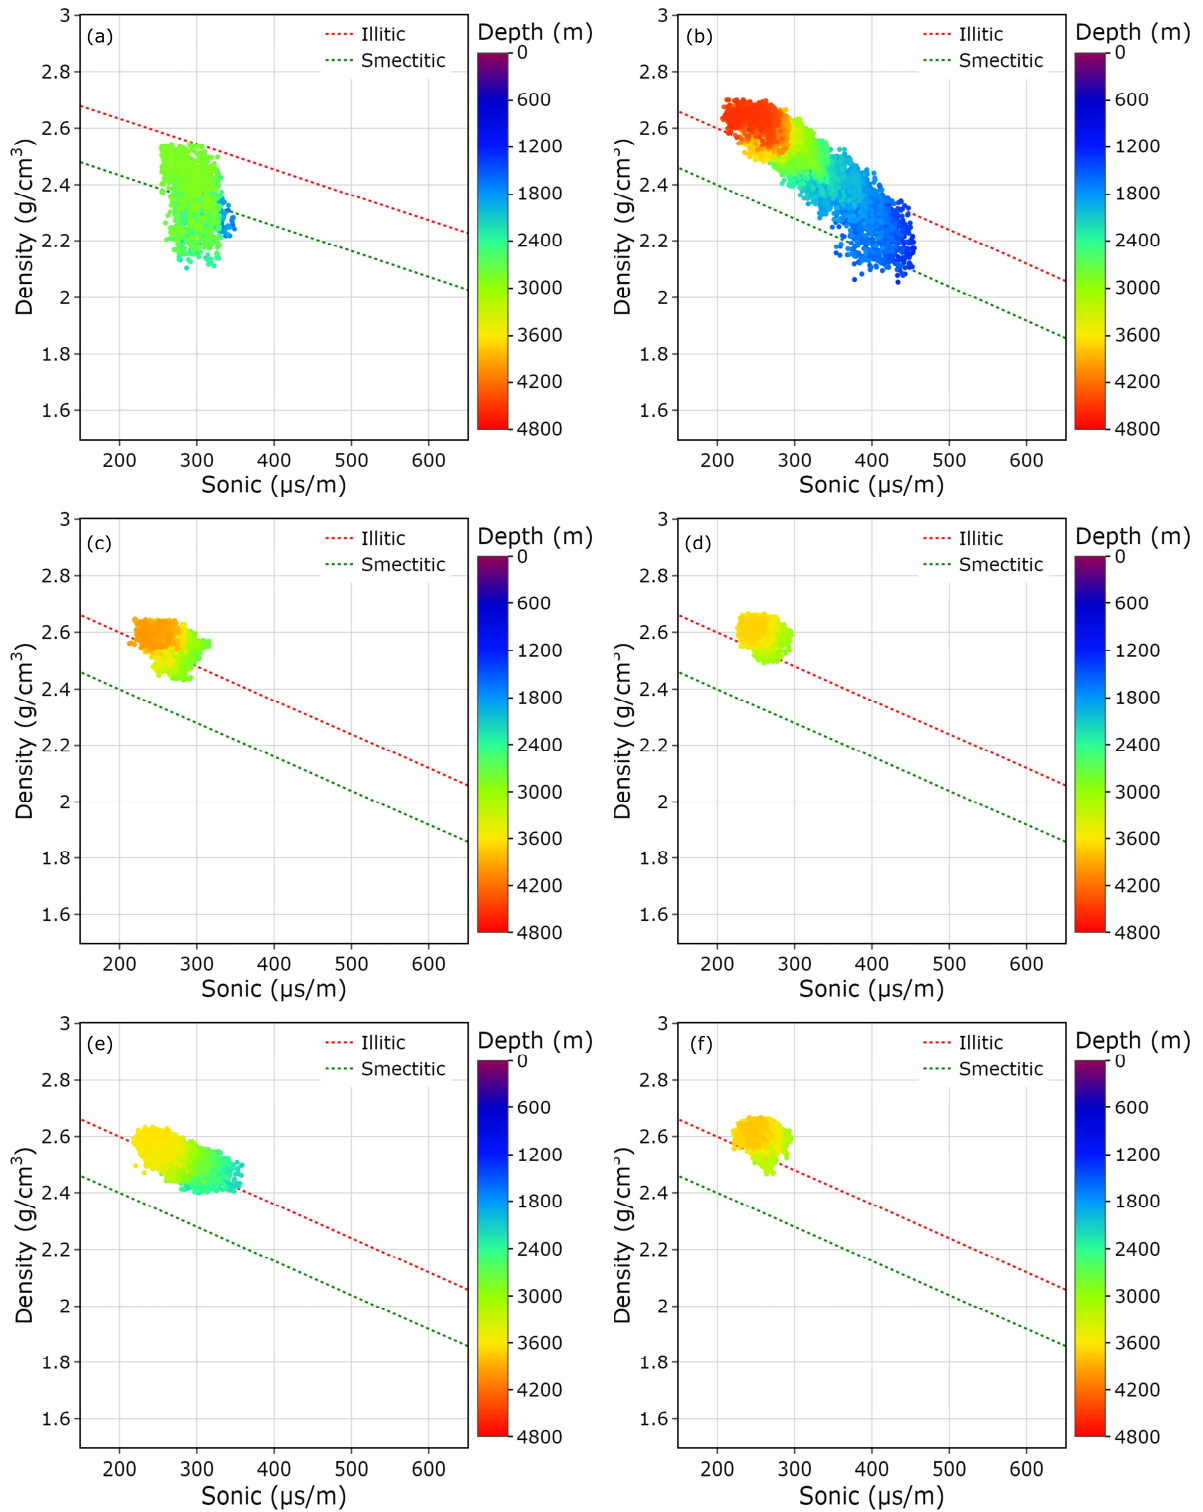

**Fig. S32** Sonic-density cross plot of mudrocks at **a** Well no. 19, **b** Well no. 20, **c** Well no. 22, **d** Well no. 24, **e** Well no. 25, and **f** Well no. 26

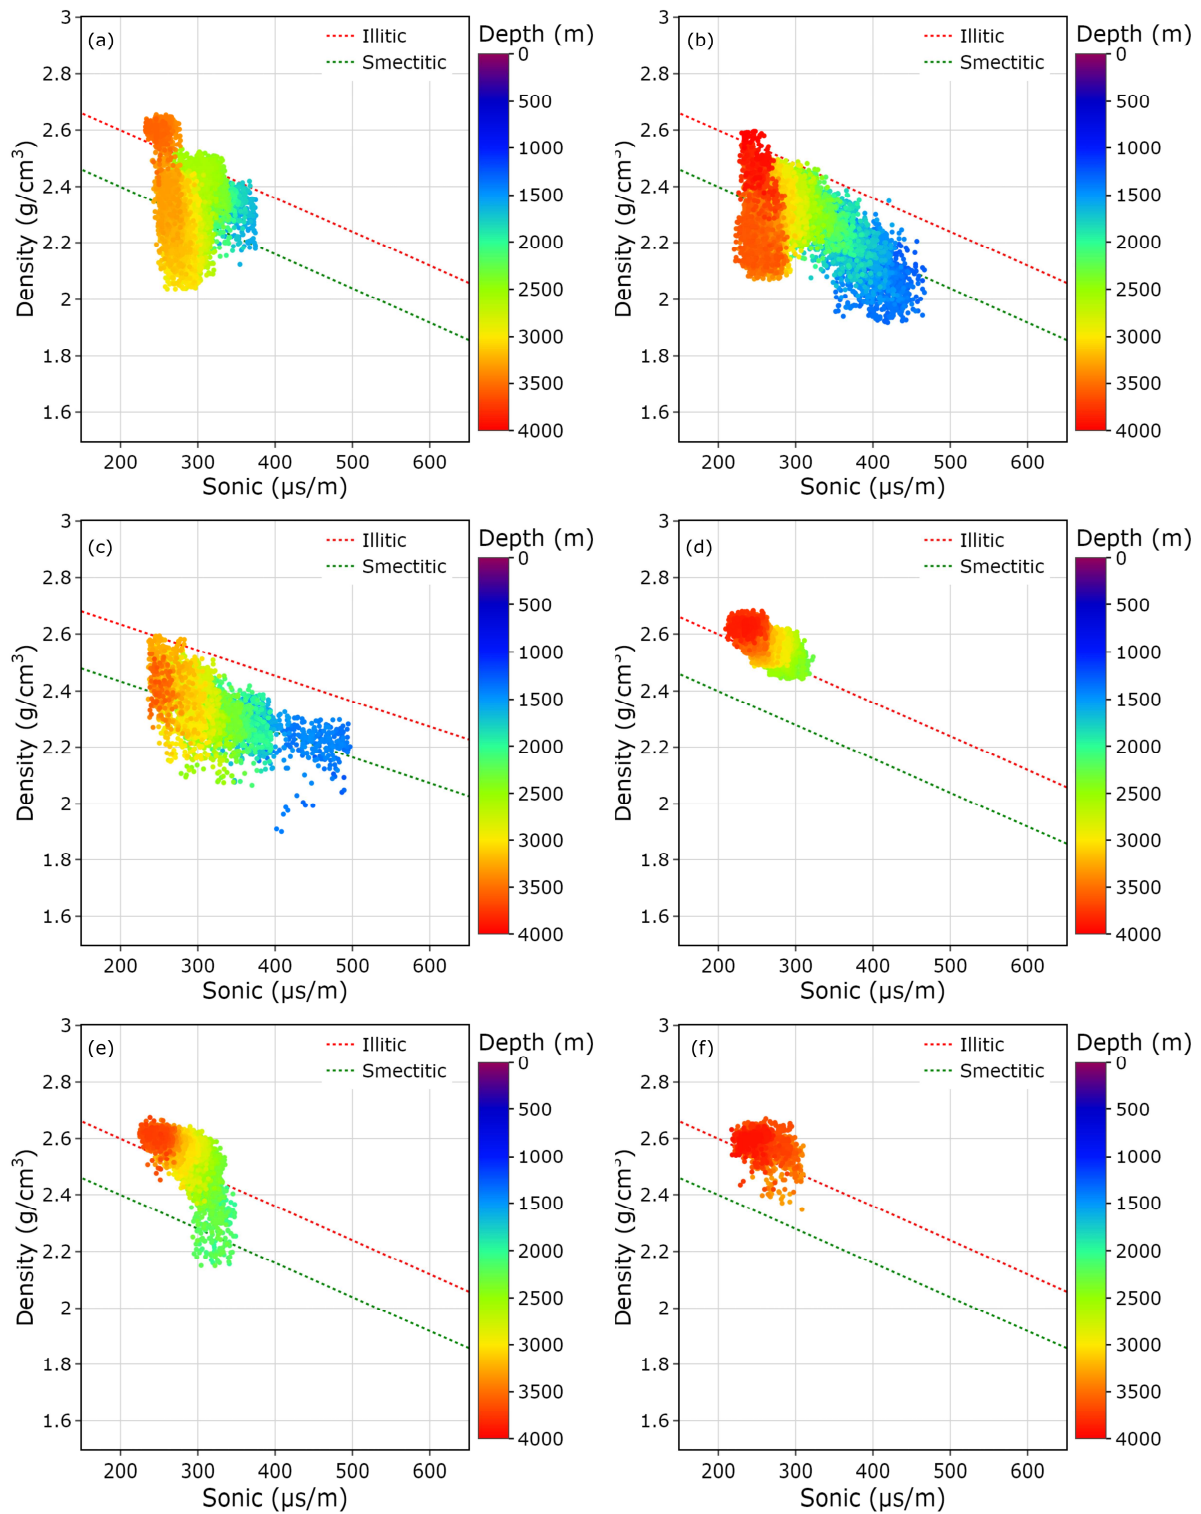

**Fig. S33** Sonic-density cross plot of mudrocks at **a** Well no. 28, **b** Well no. 29, **c** Well no. 31, **d** Well no. 32, **e** Well no. 33, and **f** Well no. 34

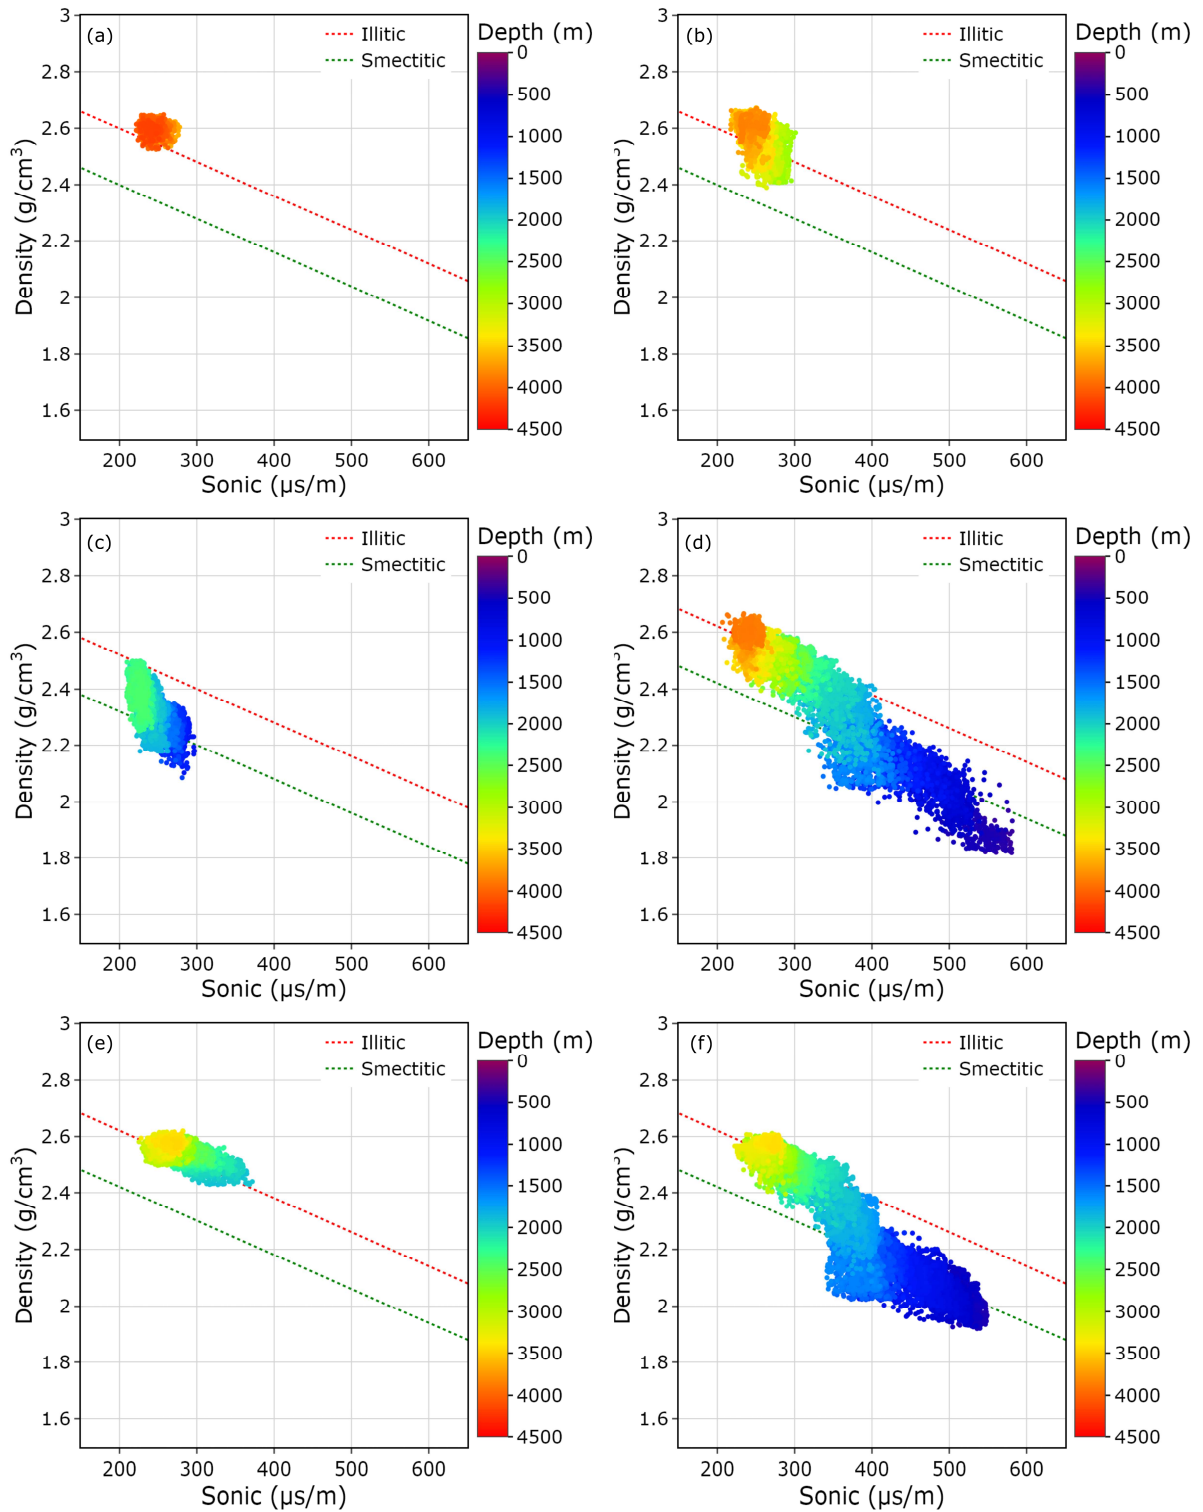

**Fig. S34** Sonic-density cross plot of mudrocks at **a** Well no. 35, **b** Well no. 37, **c** Well no. 38, **d** Well no. 39, **e** Well no. 40, and **f** Well no. 41

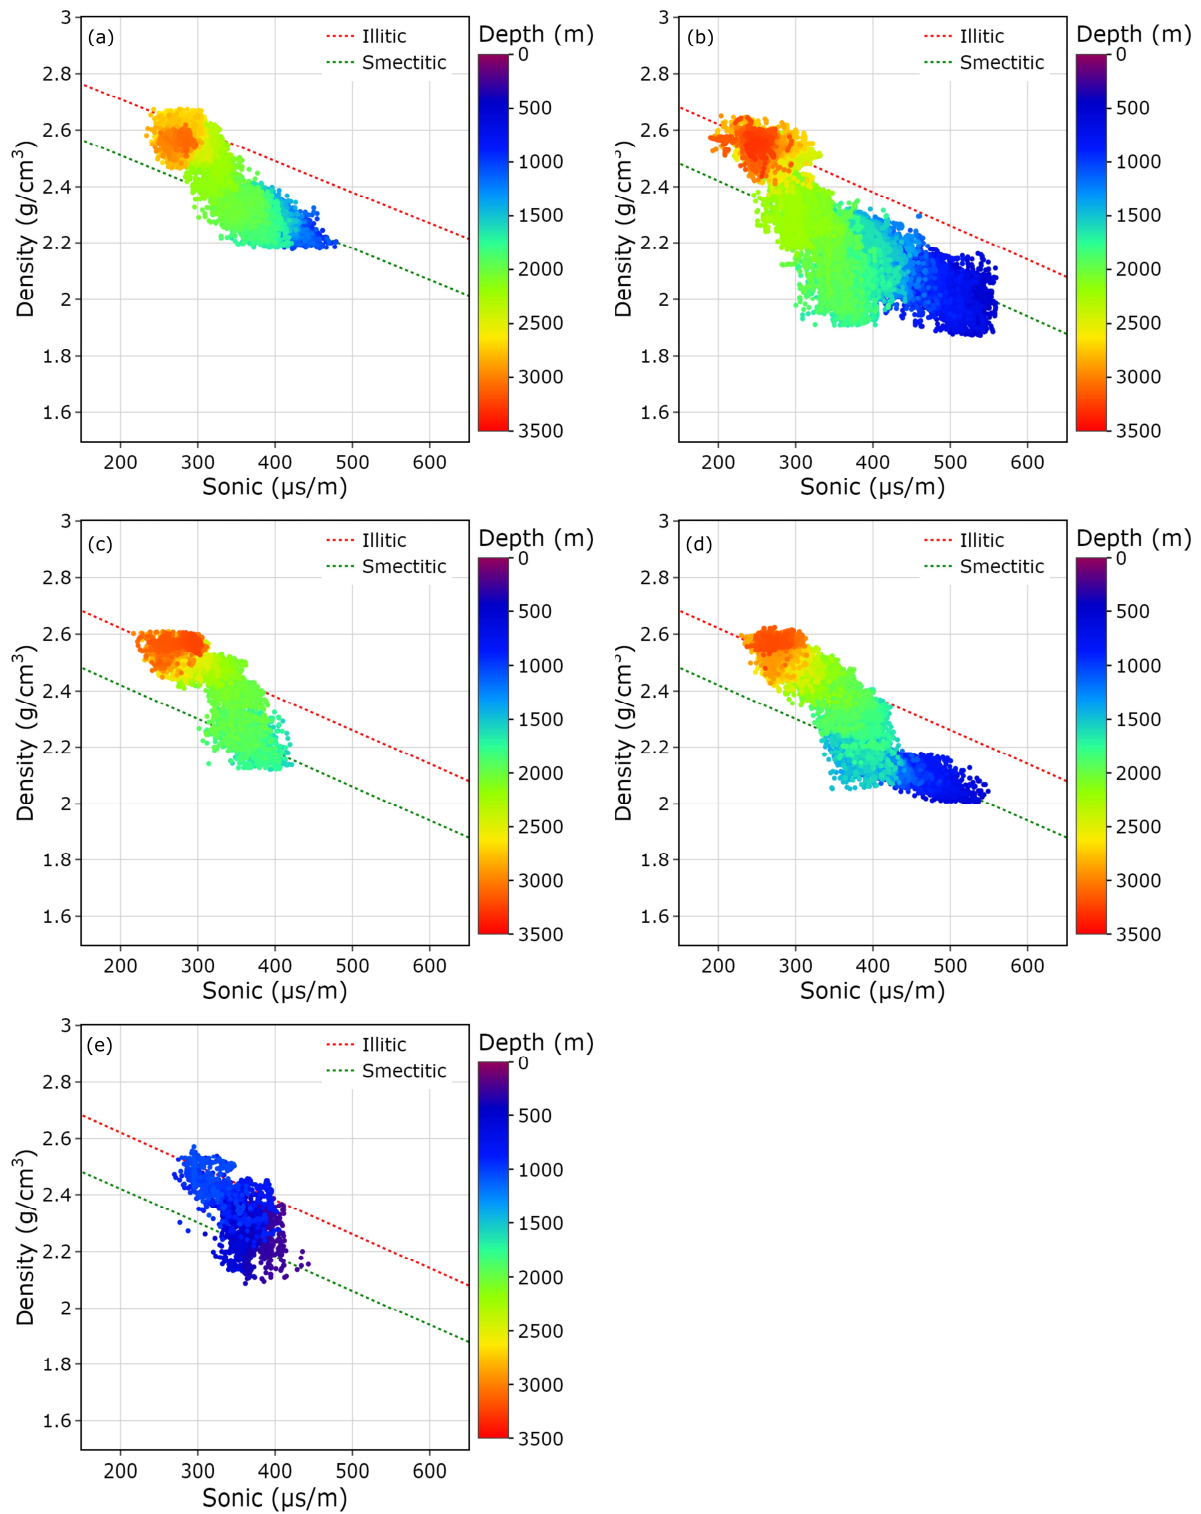

**Fig. S35** Sonic-density cross plot of mudrocks at **a** Well no. 42, **b** Well no. 43, **c** Well no. 44, **d** Well no. 45, and **e** Well no. 2

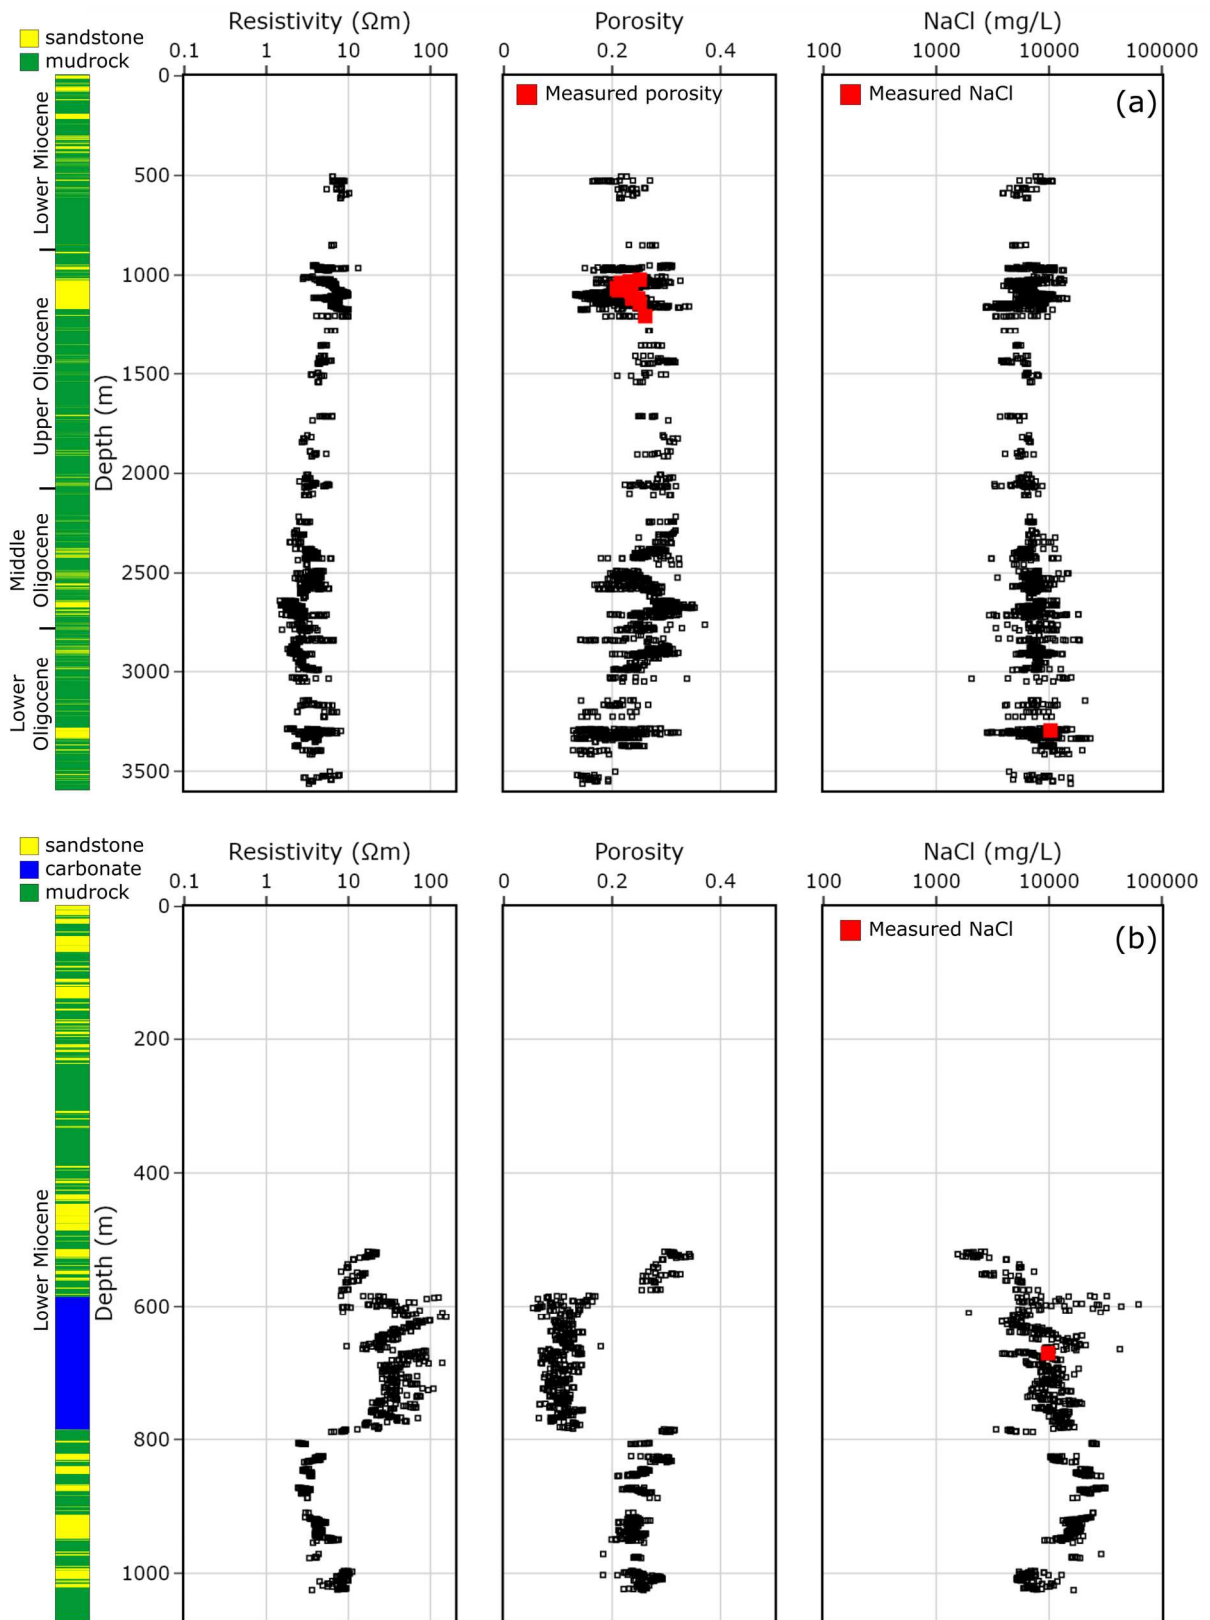

**Fig. S36** The result of NaCl estimation at **a** Well no. 1 and **b** Well no. 2

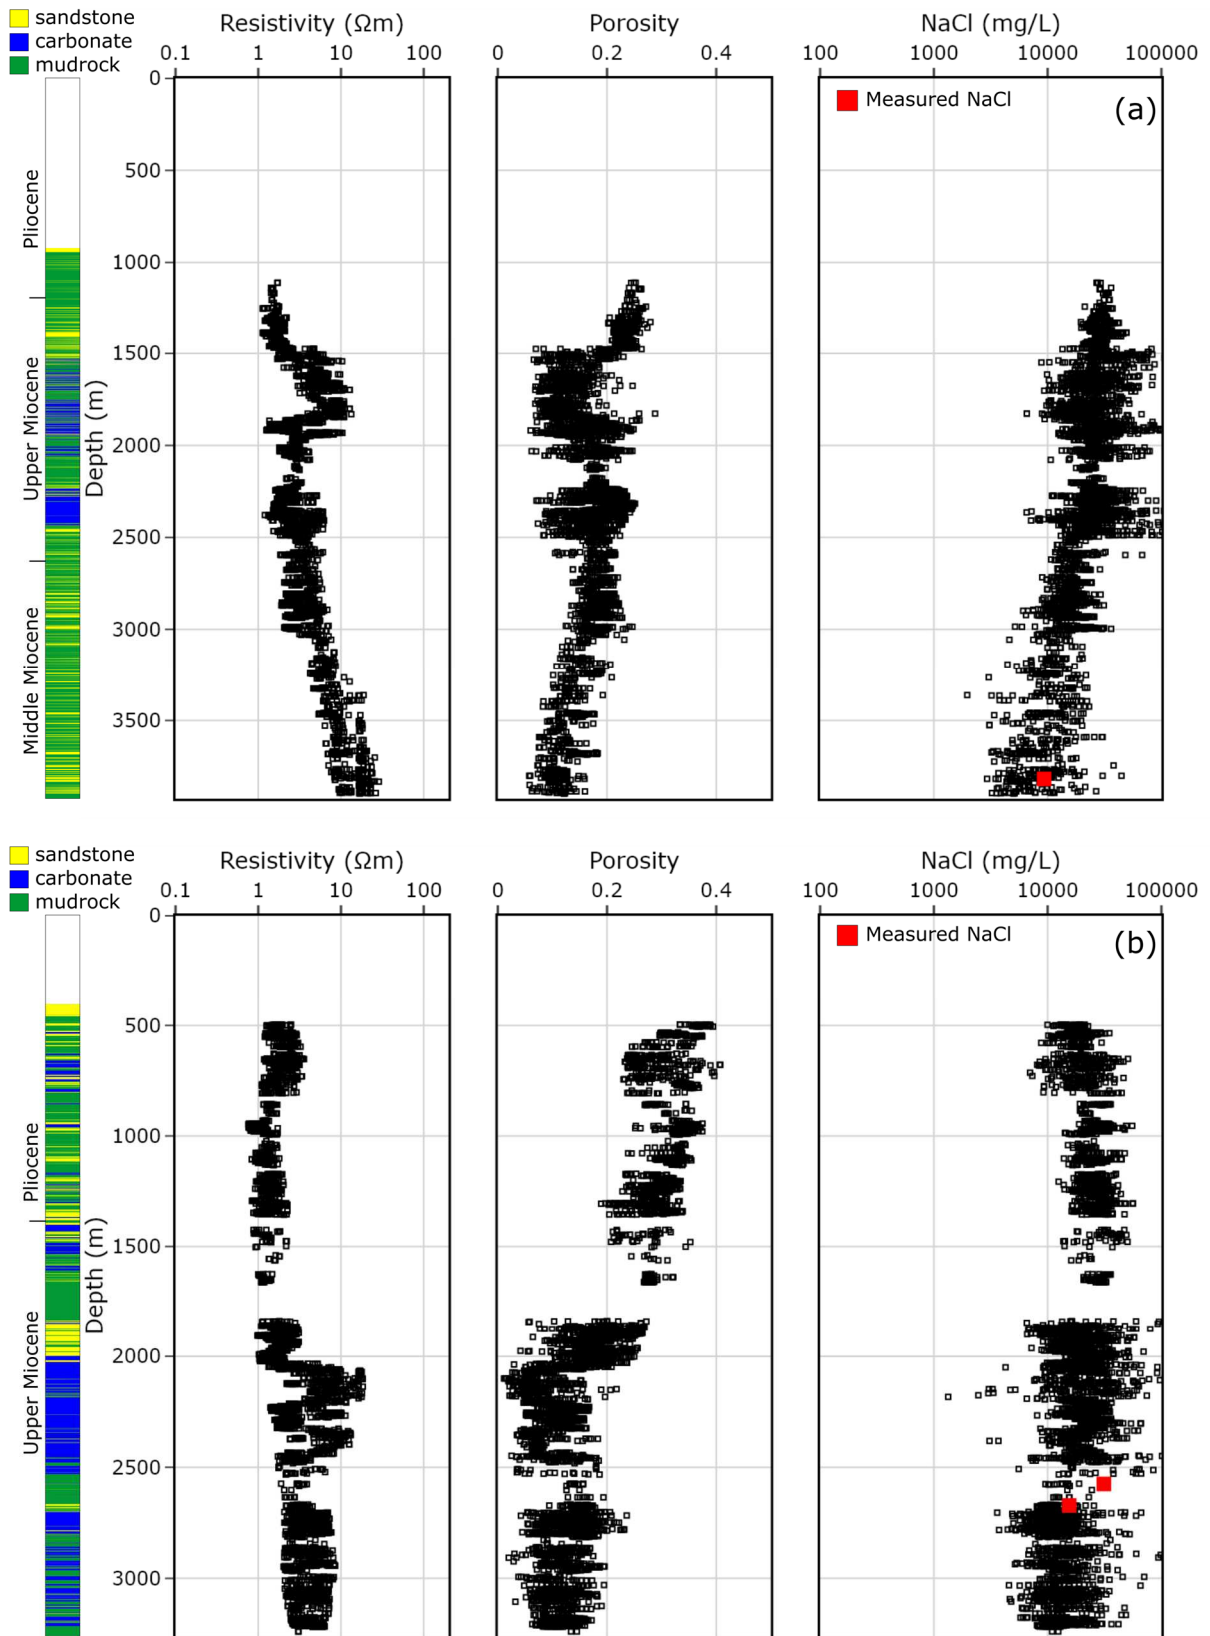

**Fig. S37** The result of NaCl estimation at **a** Well no. 4 and **b** Well no. 5

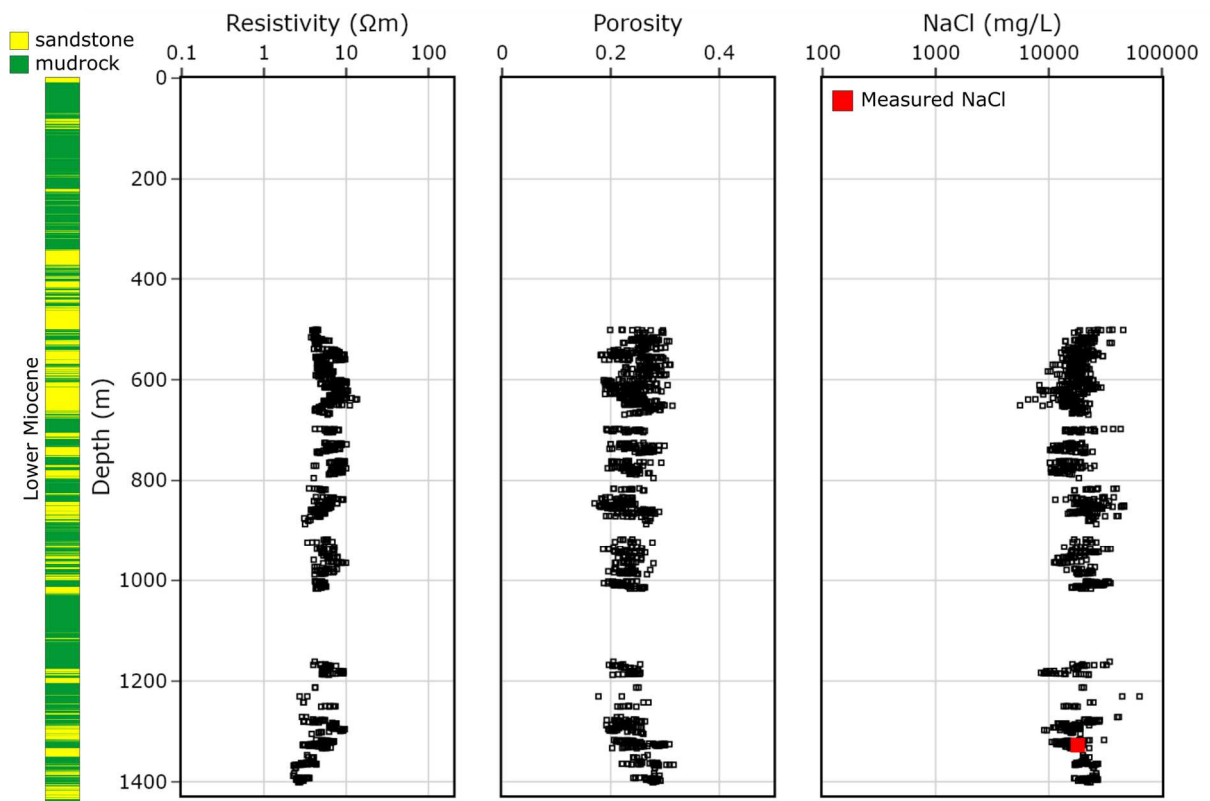

**Fig. S38** The result of NaCl estimation at Well no. 7



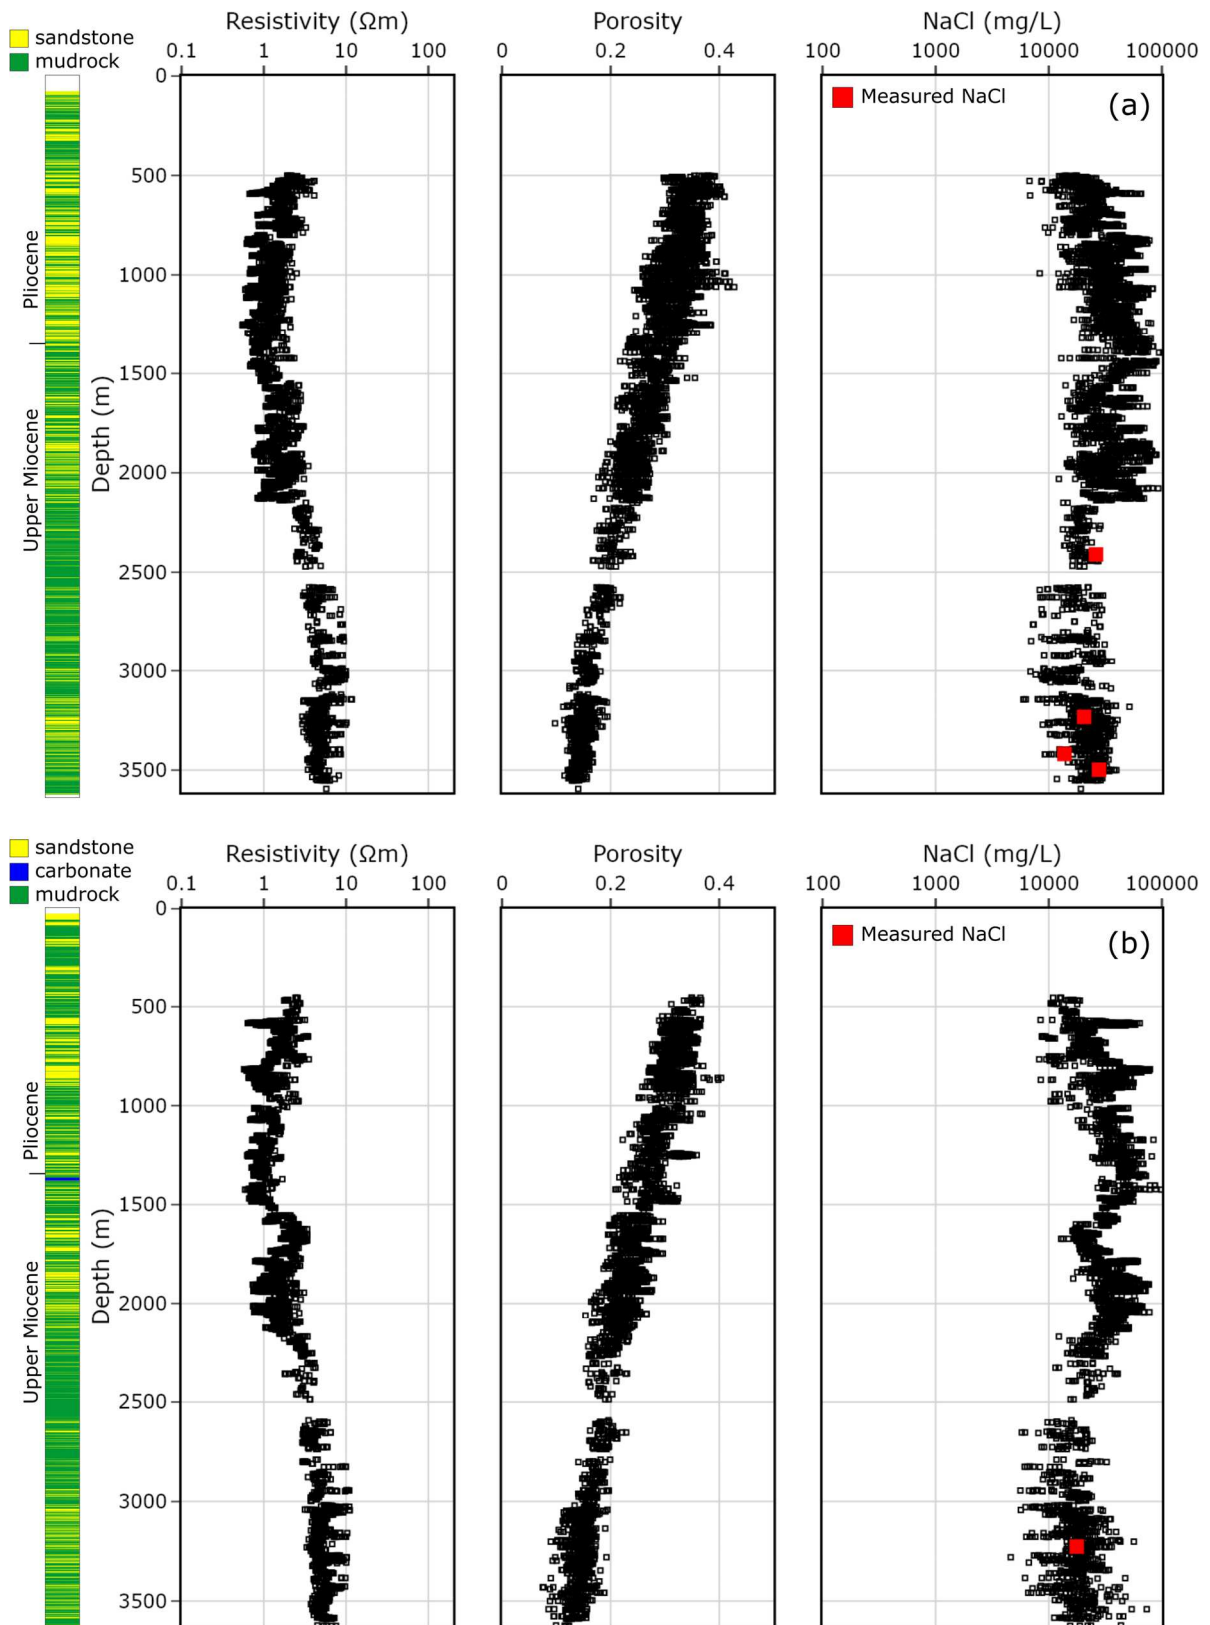

**Fig. S39** The result of NaCl estimation at **a** Well no. 10 and **b** Well no. 11

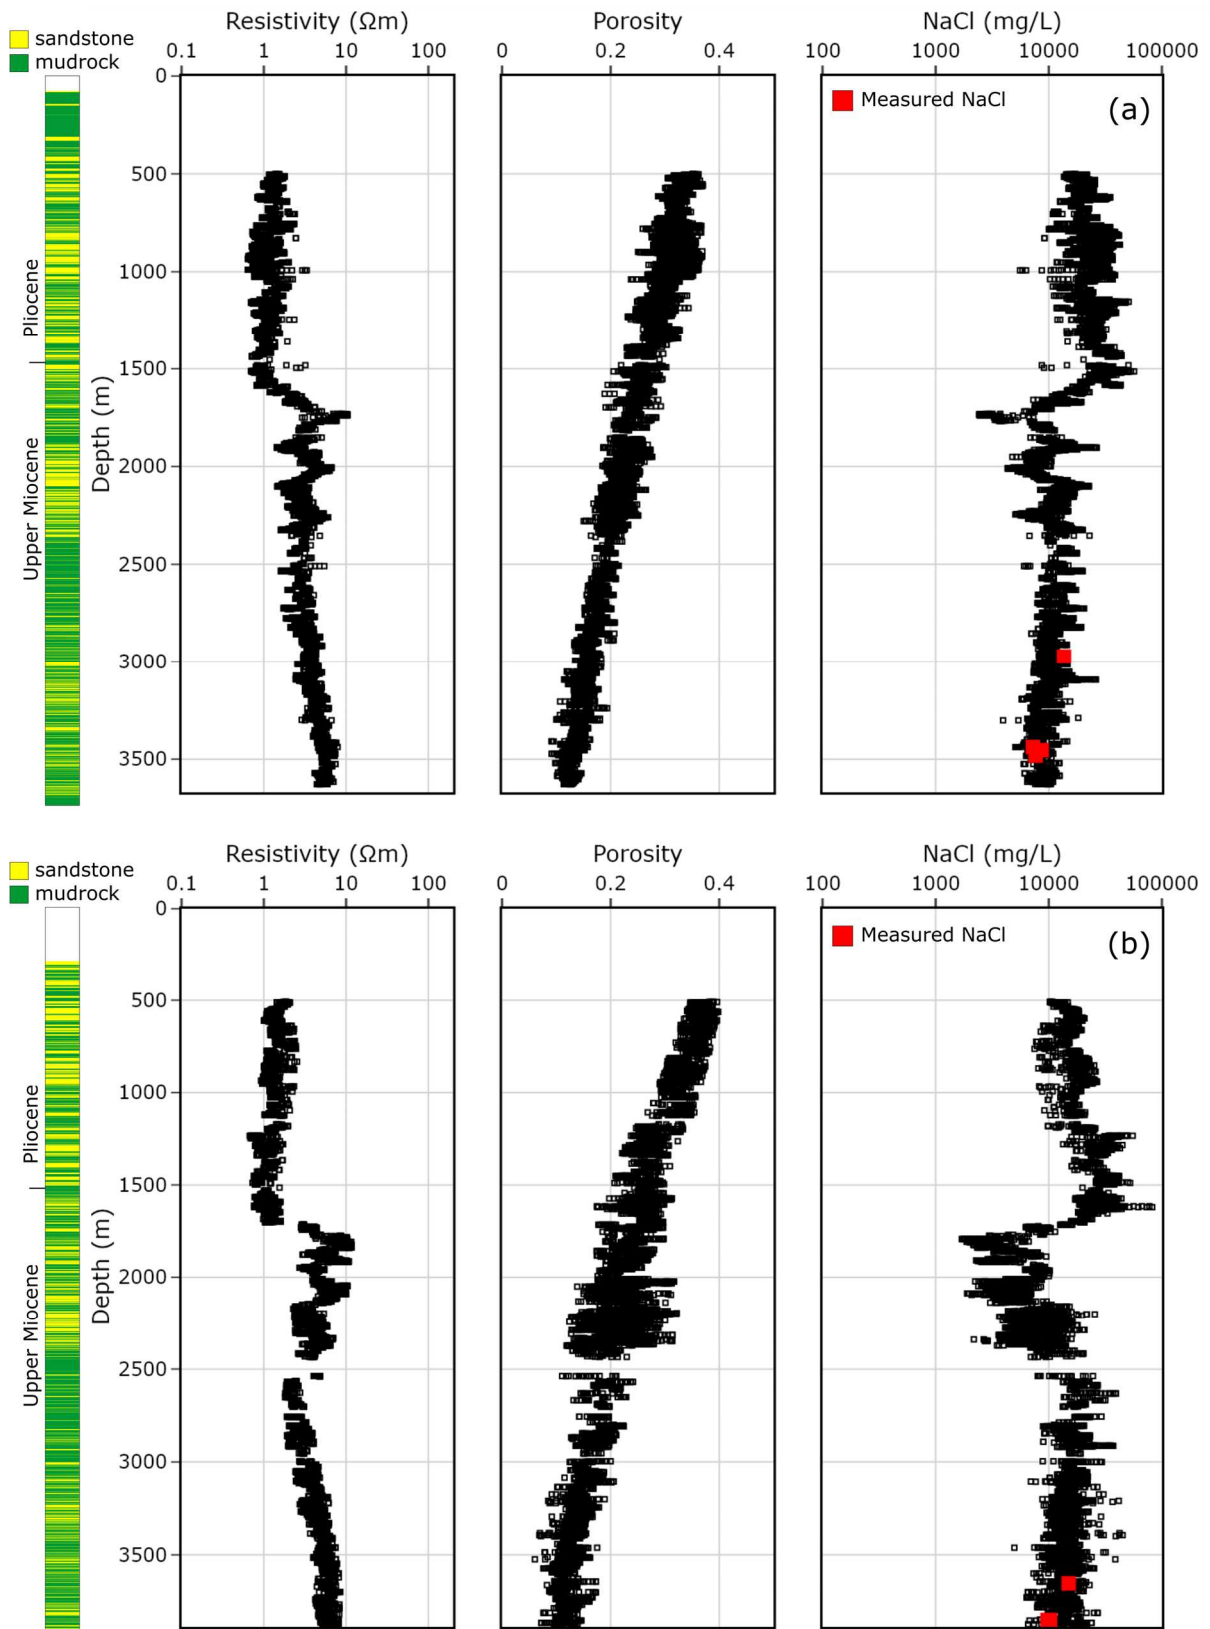

**Fig. S40** The result of NaCl estimation at **a** Well no. 12 and **b** Well no. 13

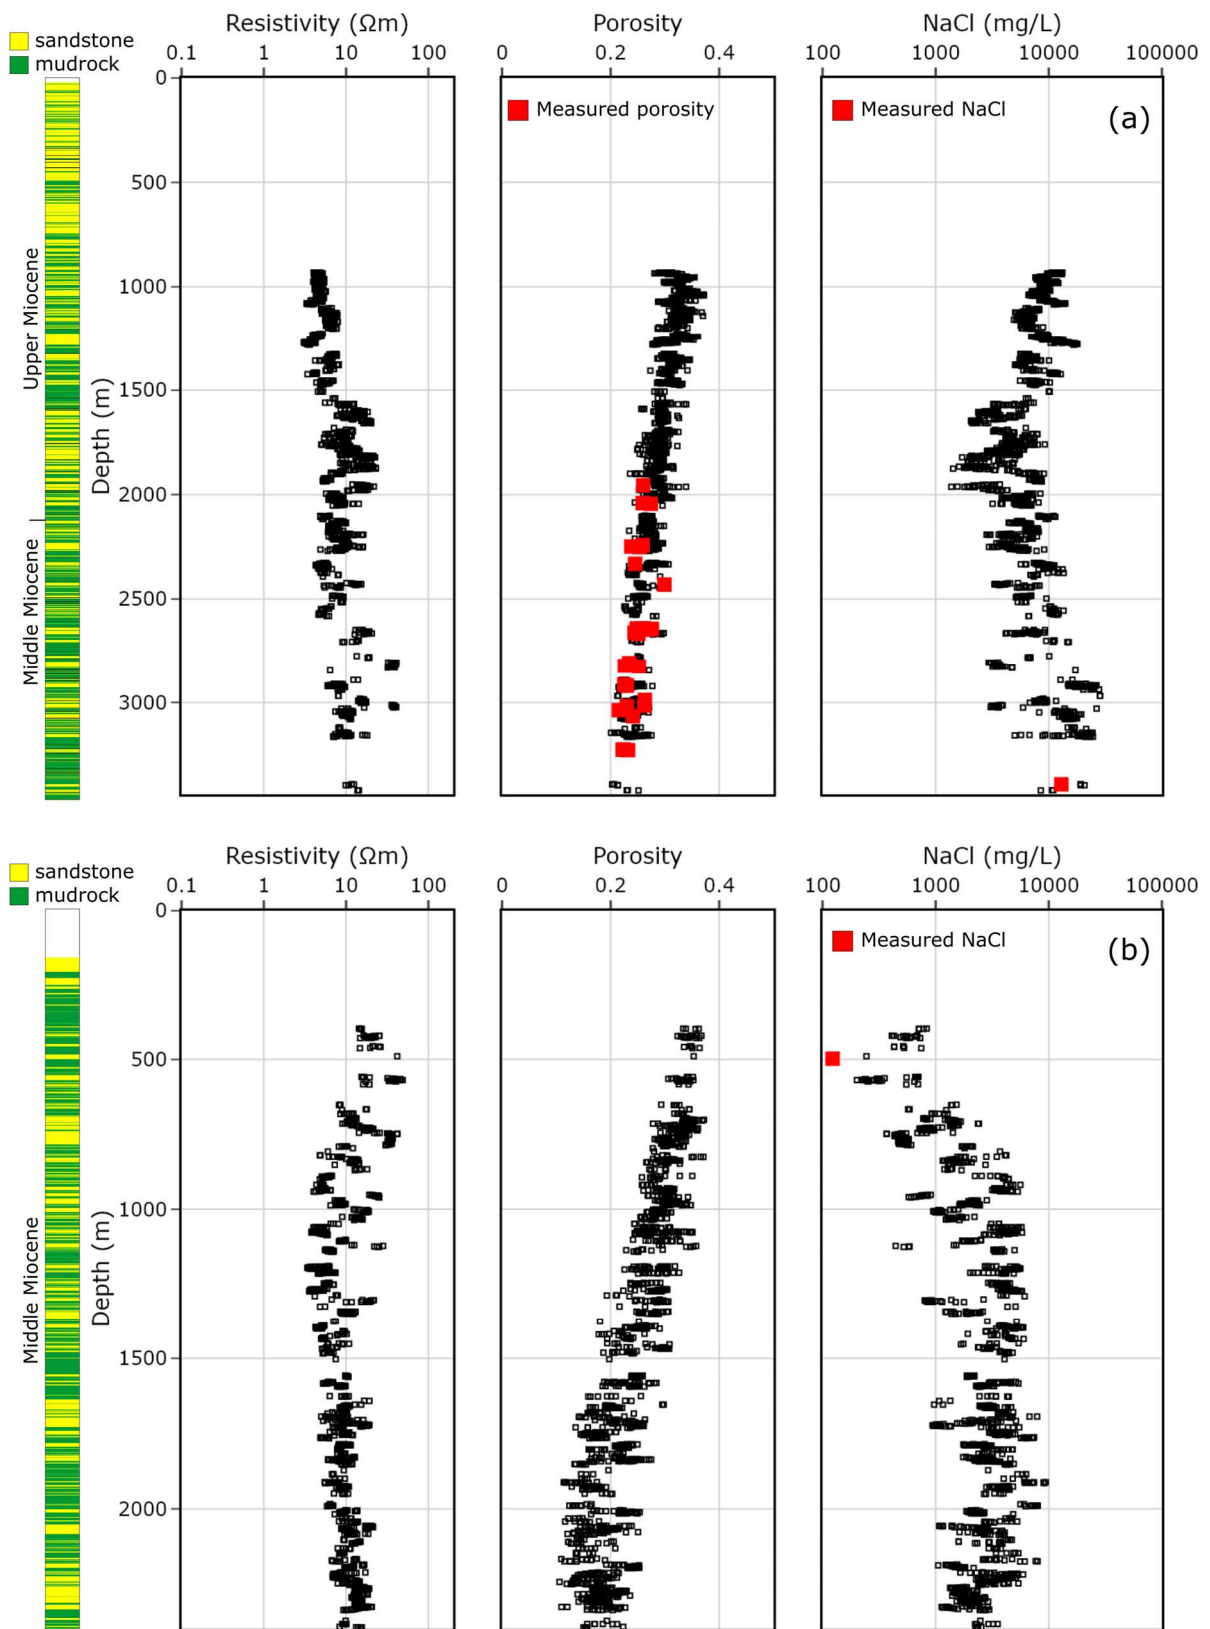

**Fig. S41** The result of NaCl estimation at **a** Well no. 16 and **b** Well no. 17

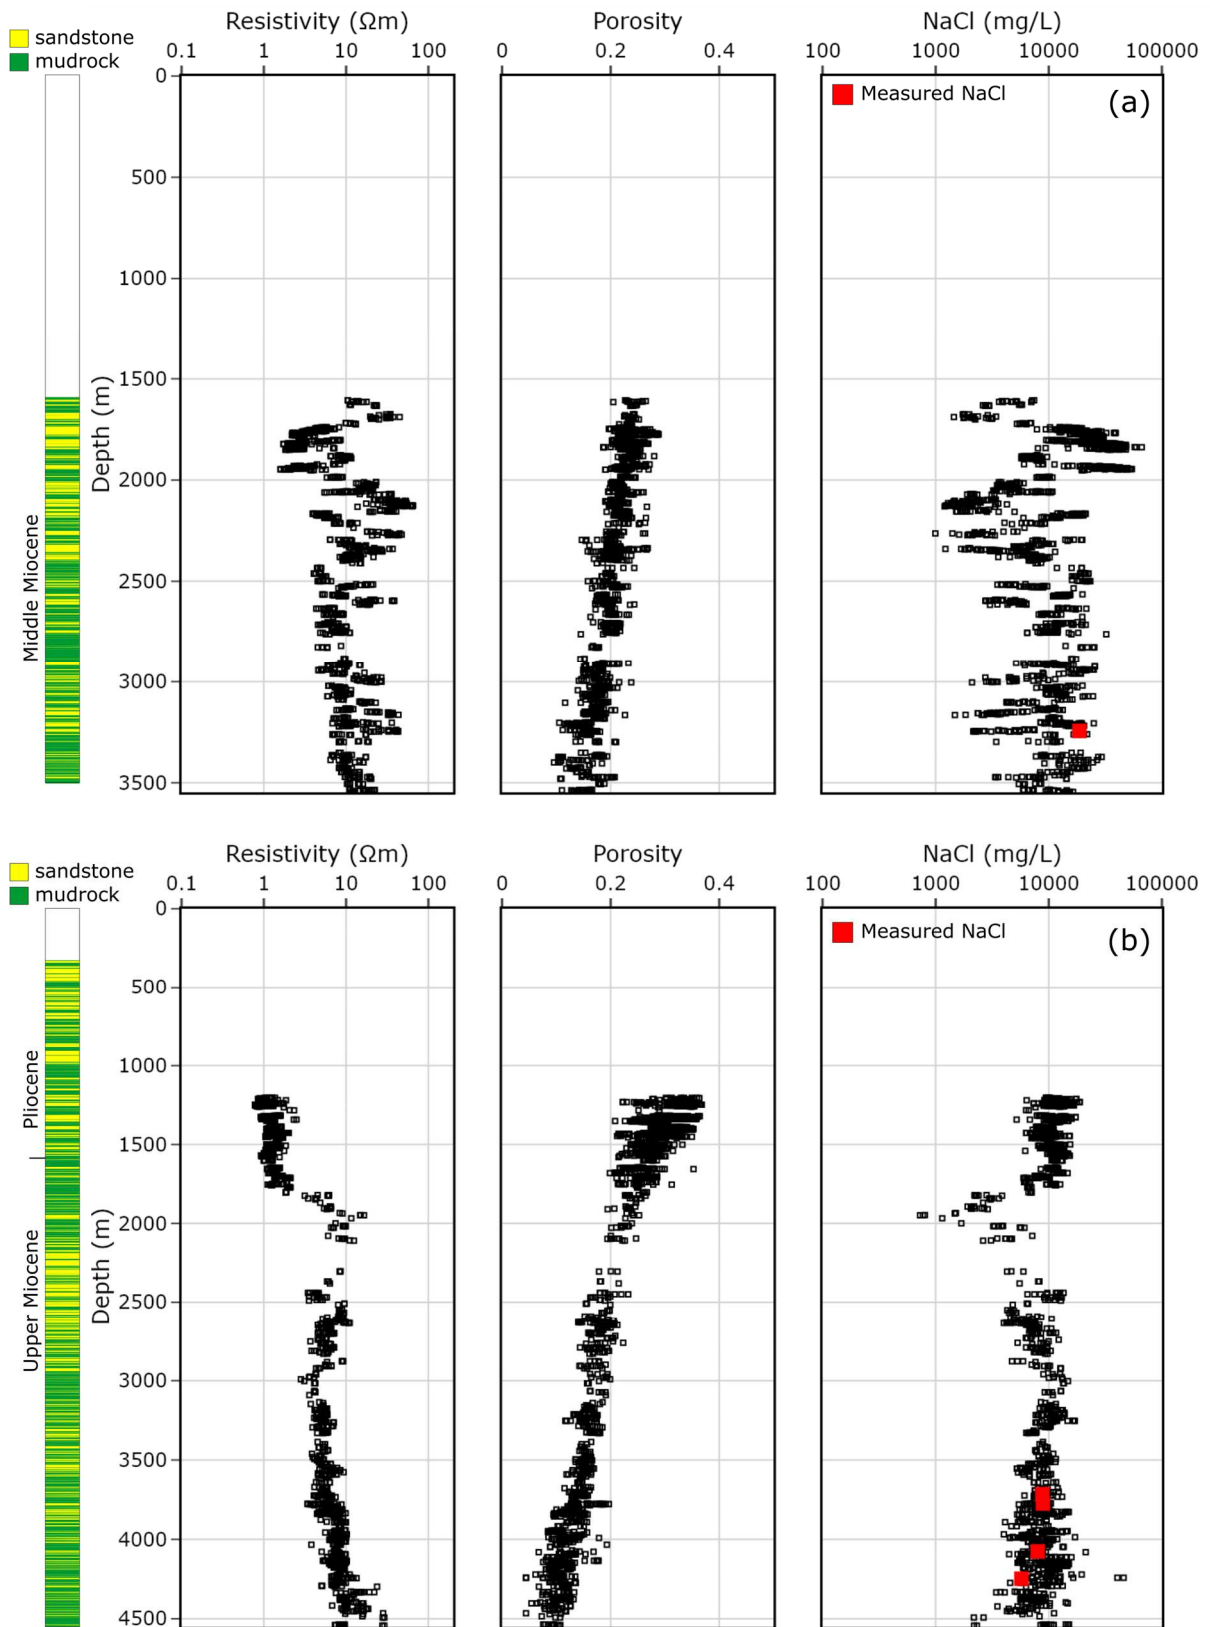

**Fig. S42** The result of NaCl estimation at **a** Well no. 19 and **b** Well no. 20

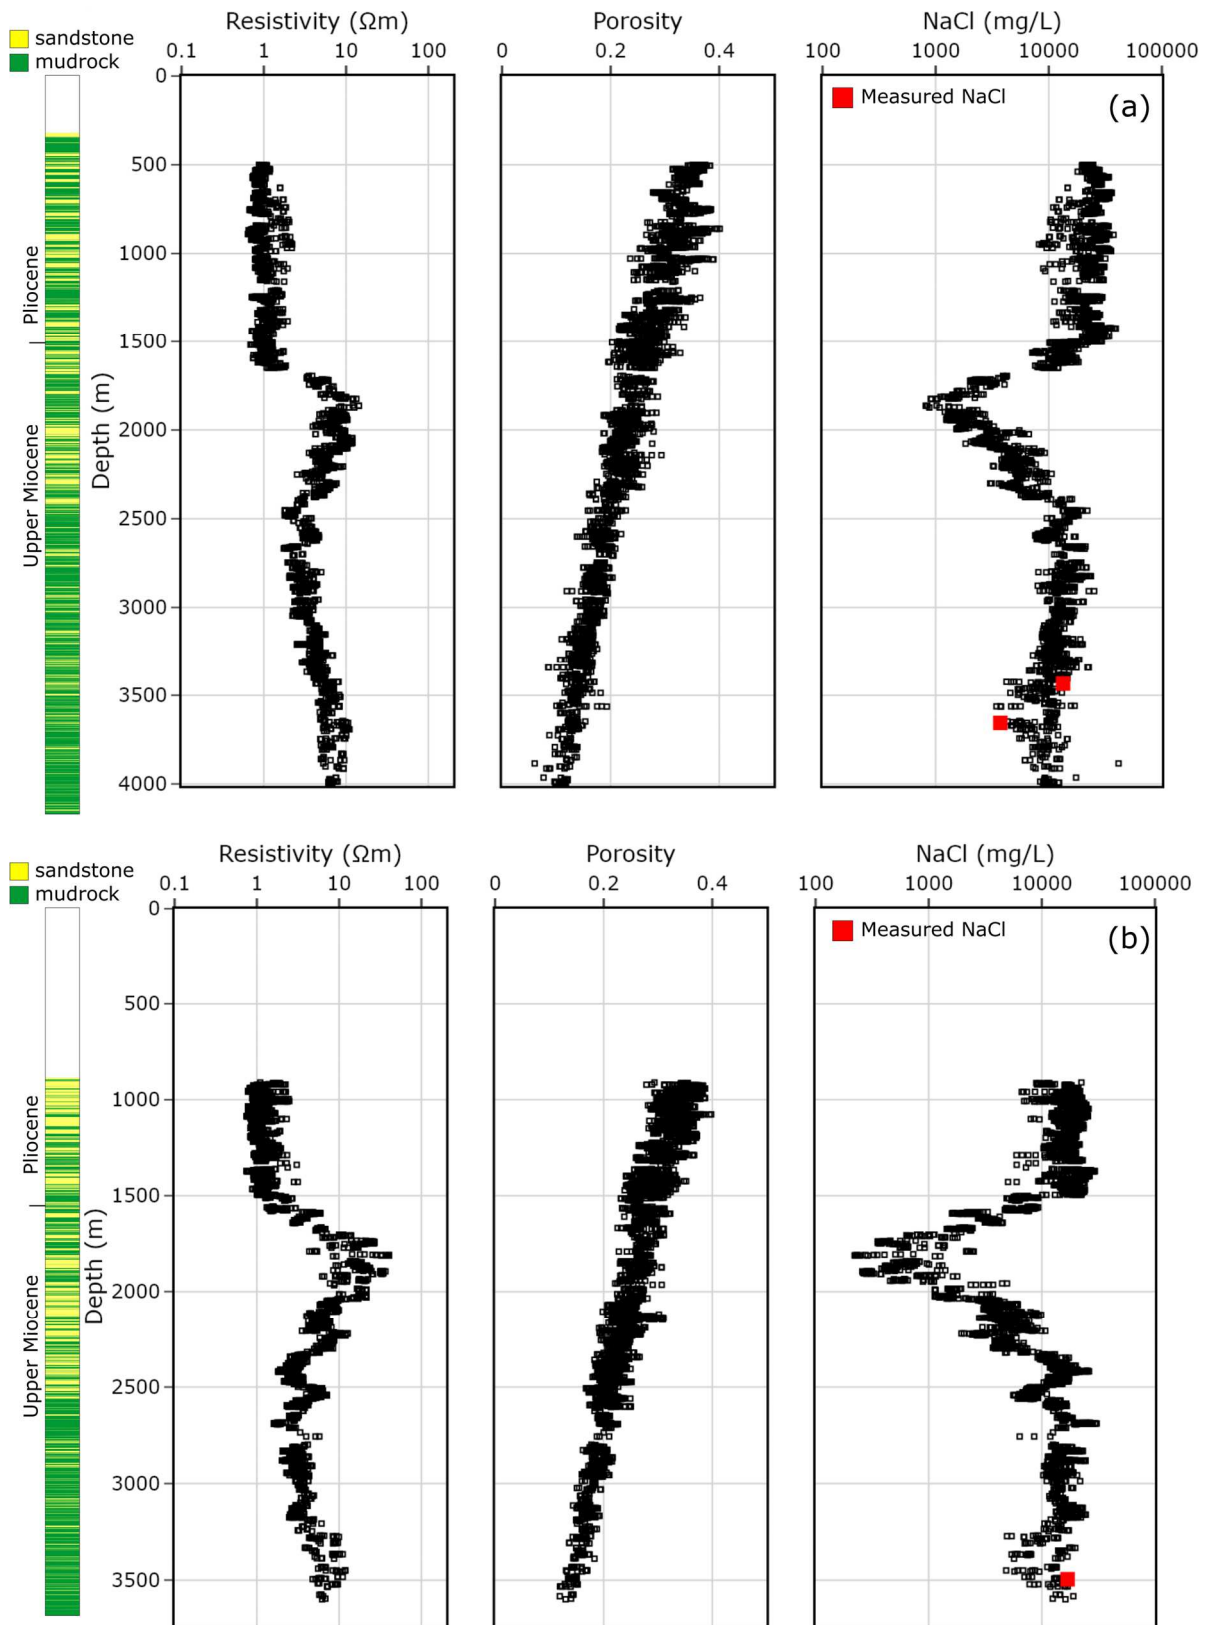

**Fig. S43** The result of NaCl estimation at **a** Well no. 22 and **b** Well no. 24



**Fig. S44** The result of NaCl estimation at **a** Well no. 25 and **b** Well no. 26

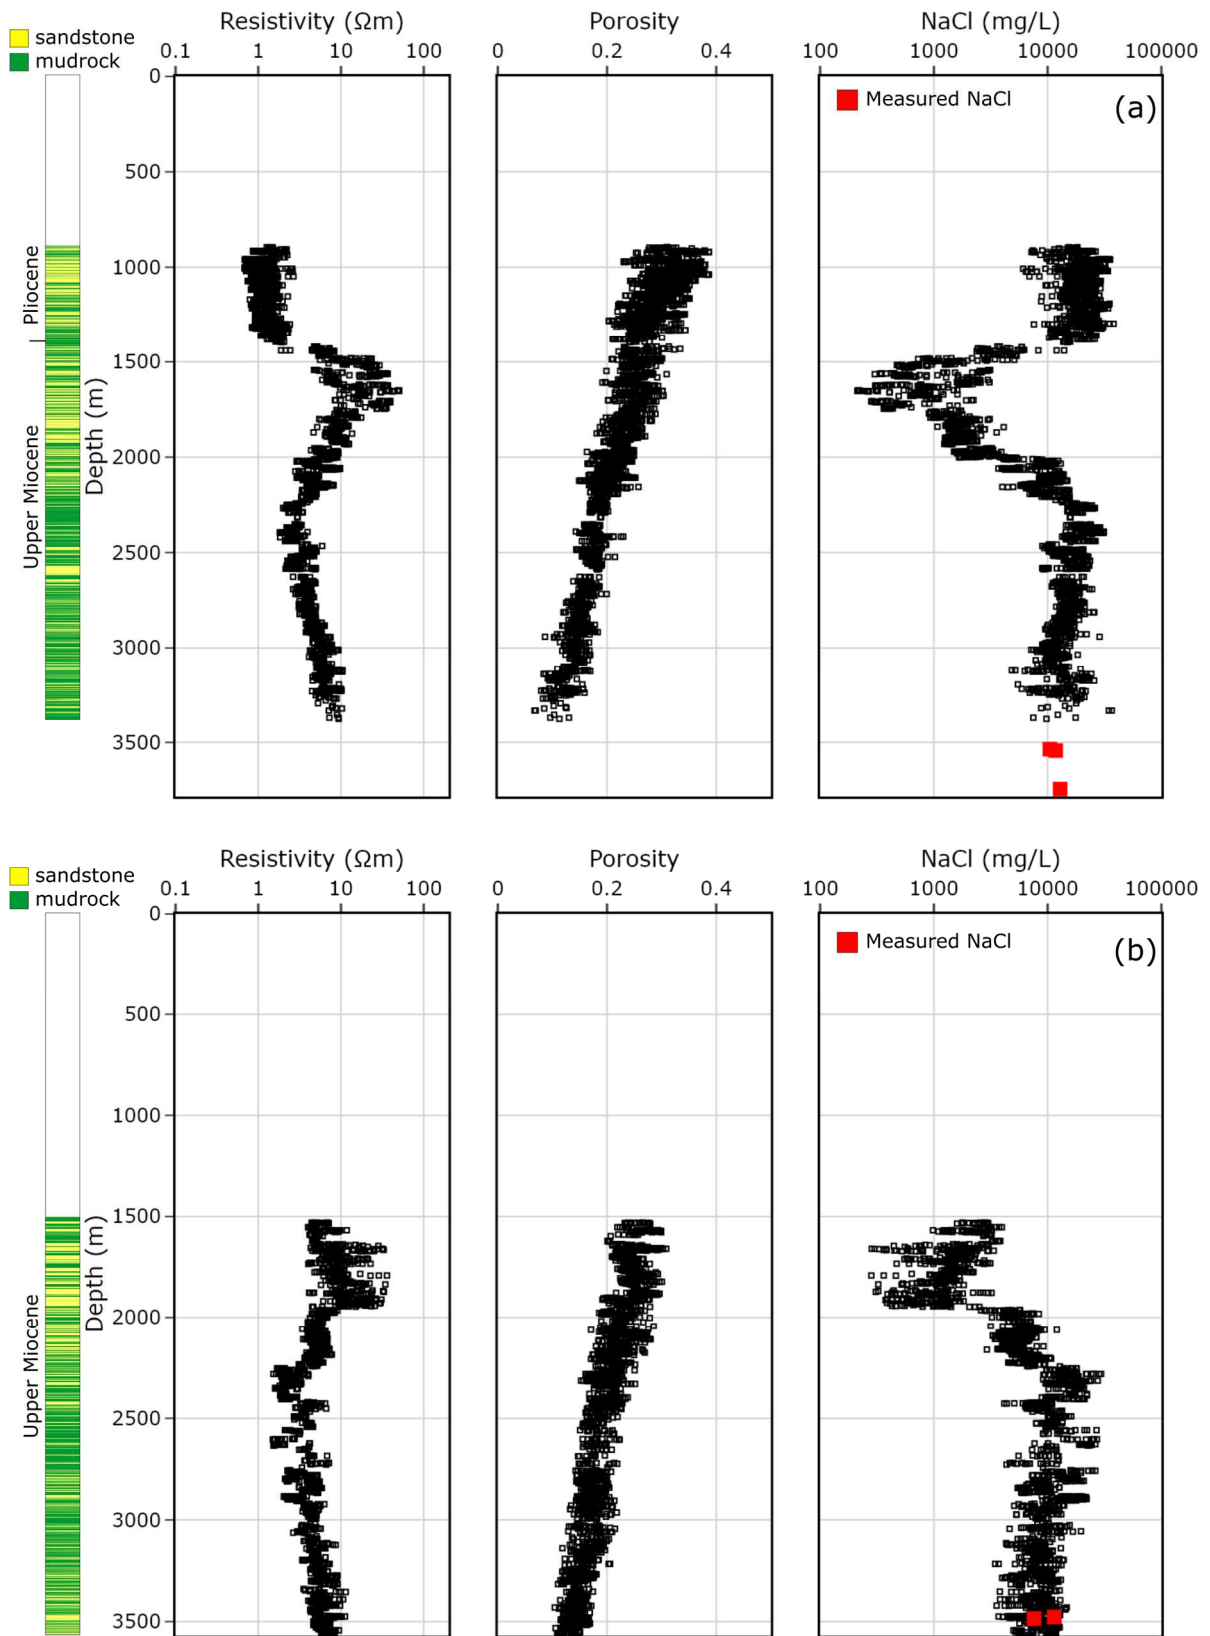

**Fig. S45** The result of NaCl estimation at **a** Well no. 27 and **b** Well no. 28

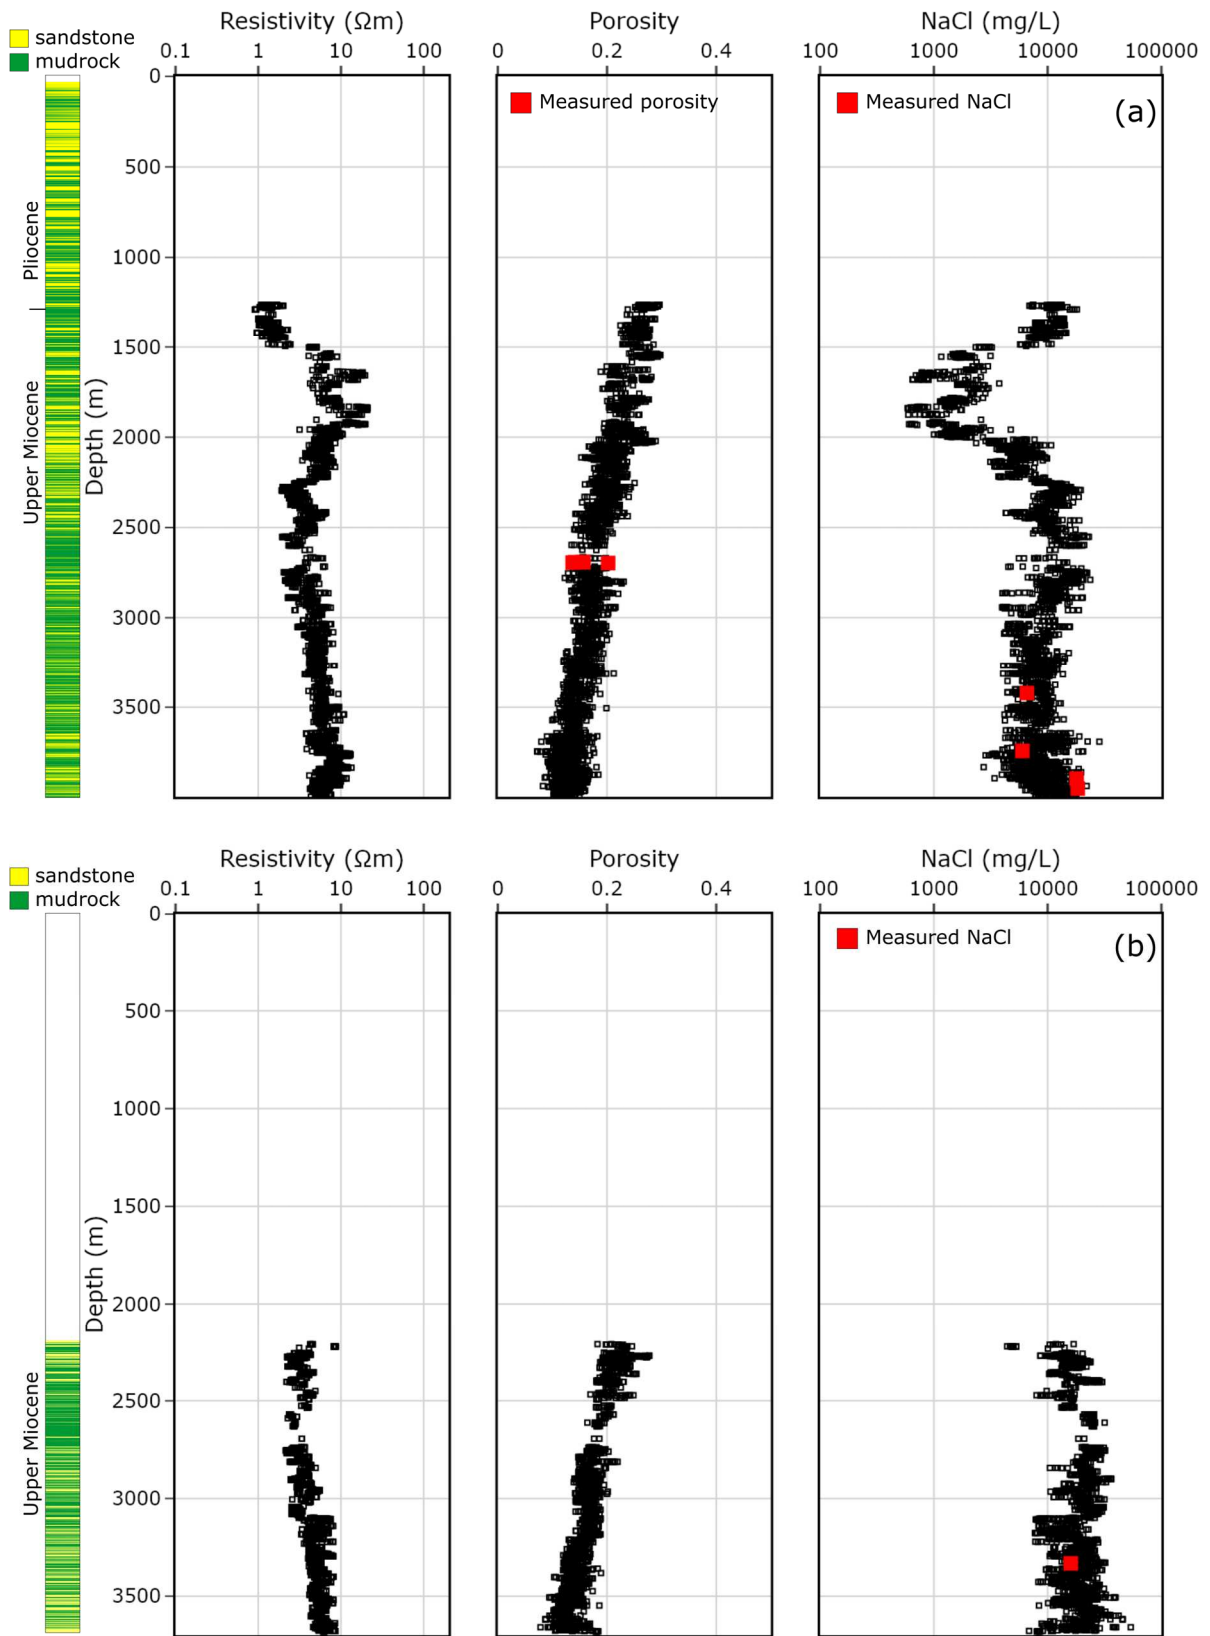

**Fig. S46** The result of NaCl estimation at **a** Well no. 29 and **b** Well no. 30



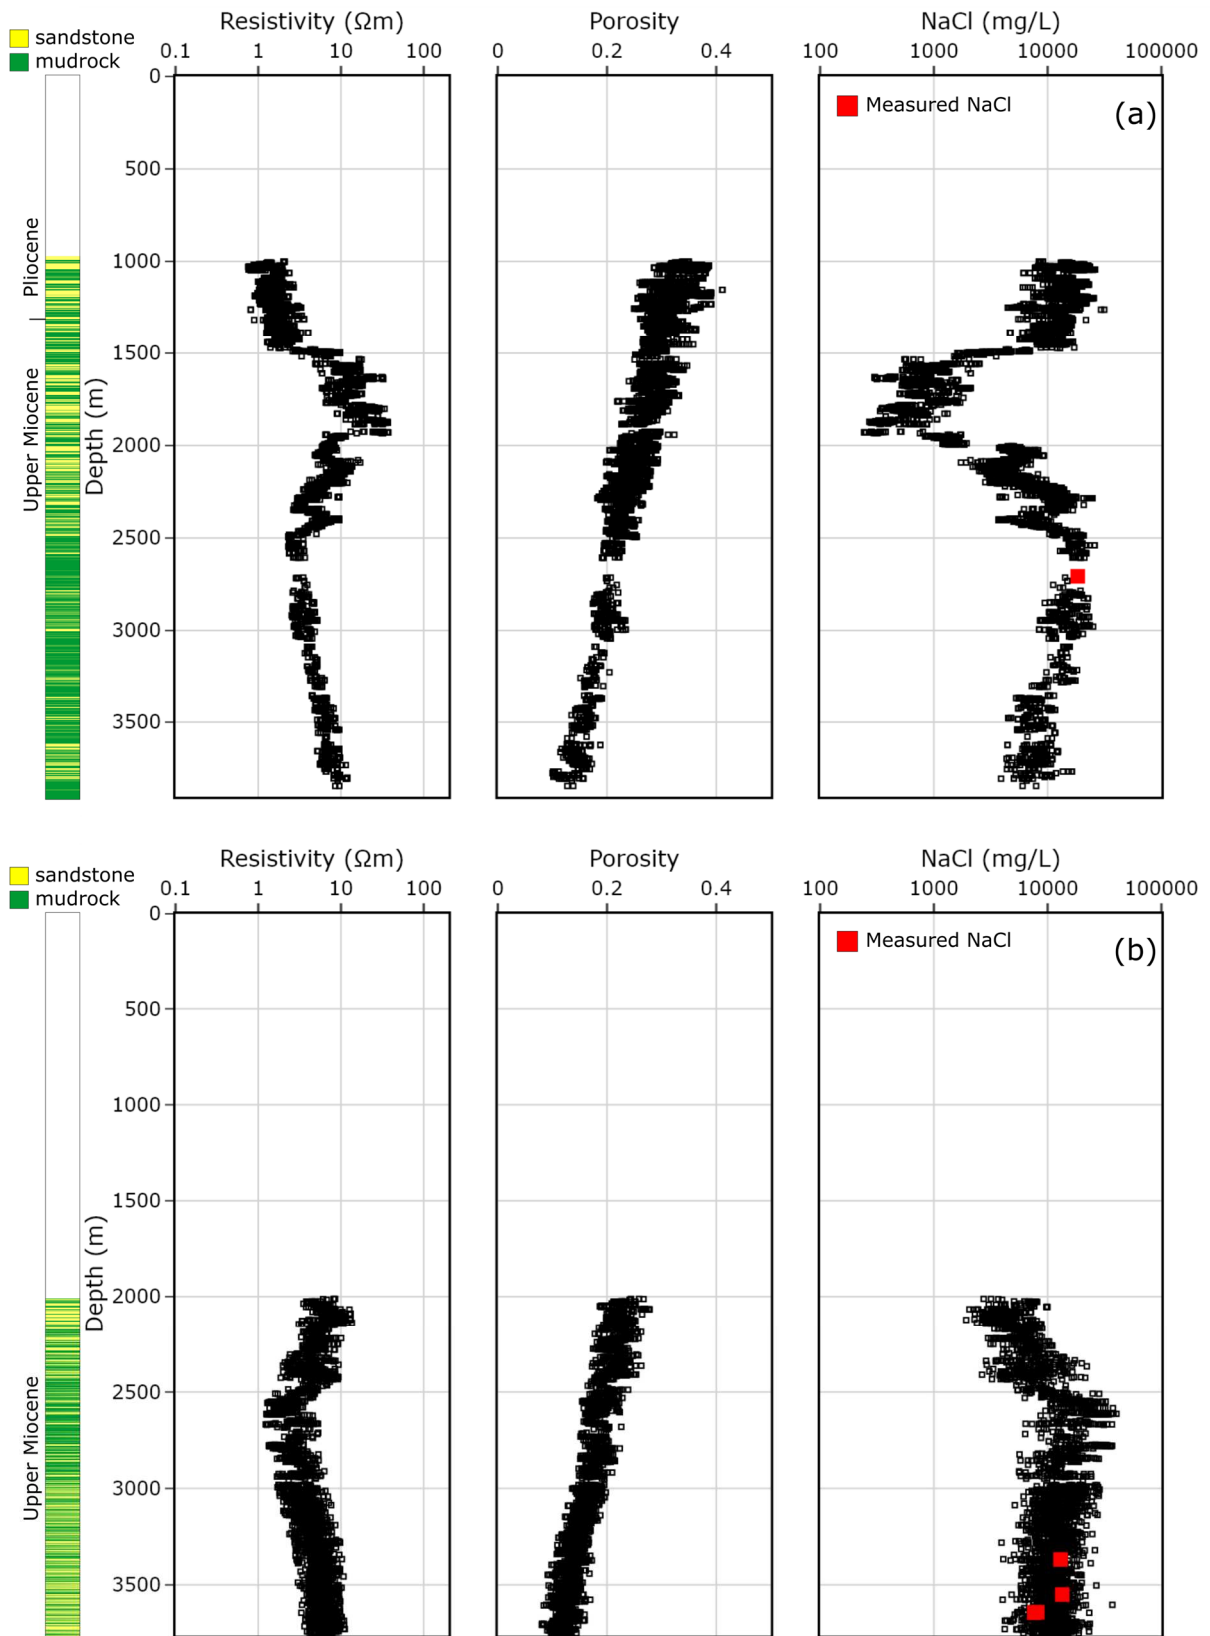

**Fig. S47** The result of NaCl estimation at **a** Well no. 32 and **b** Well no. 33

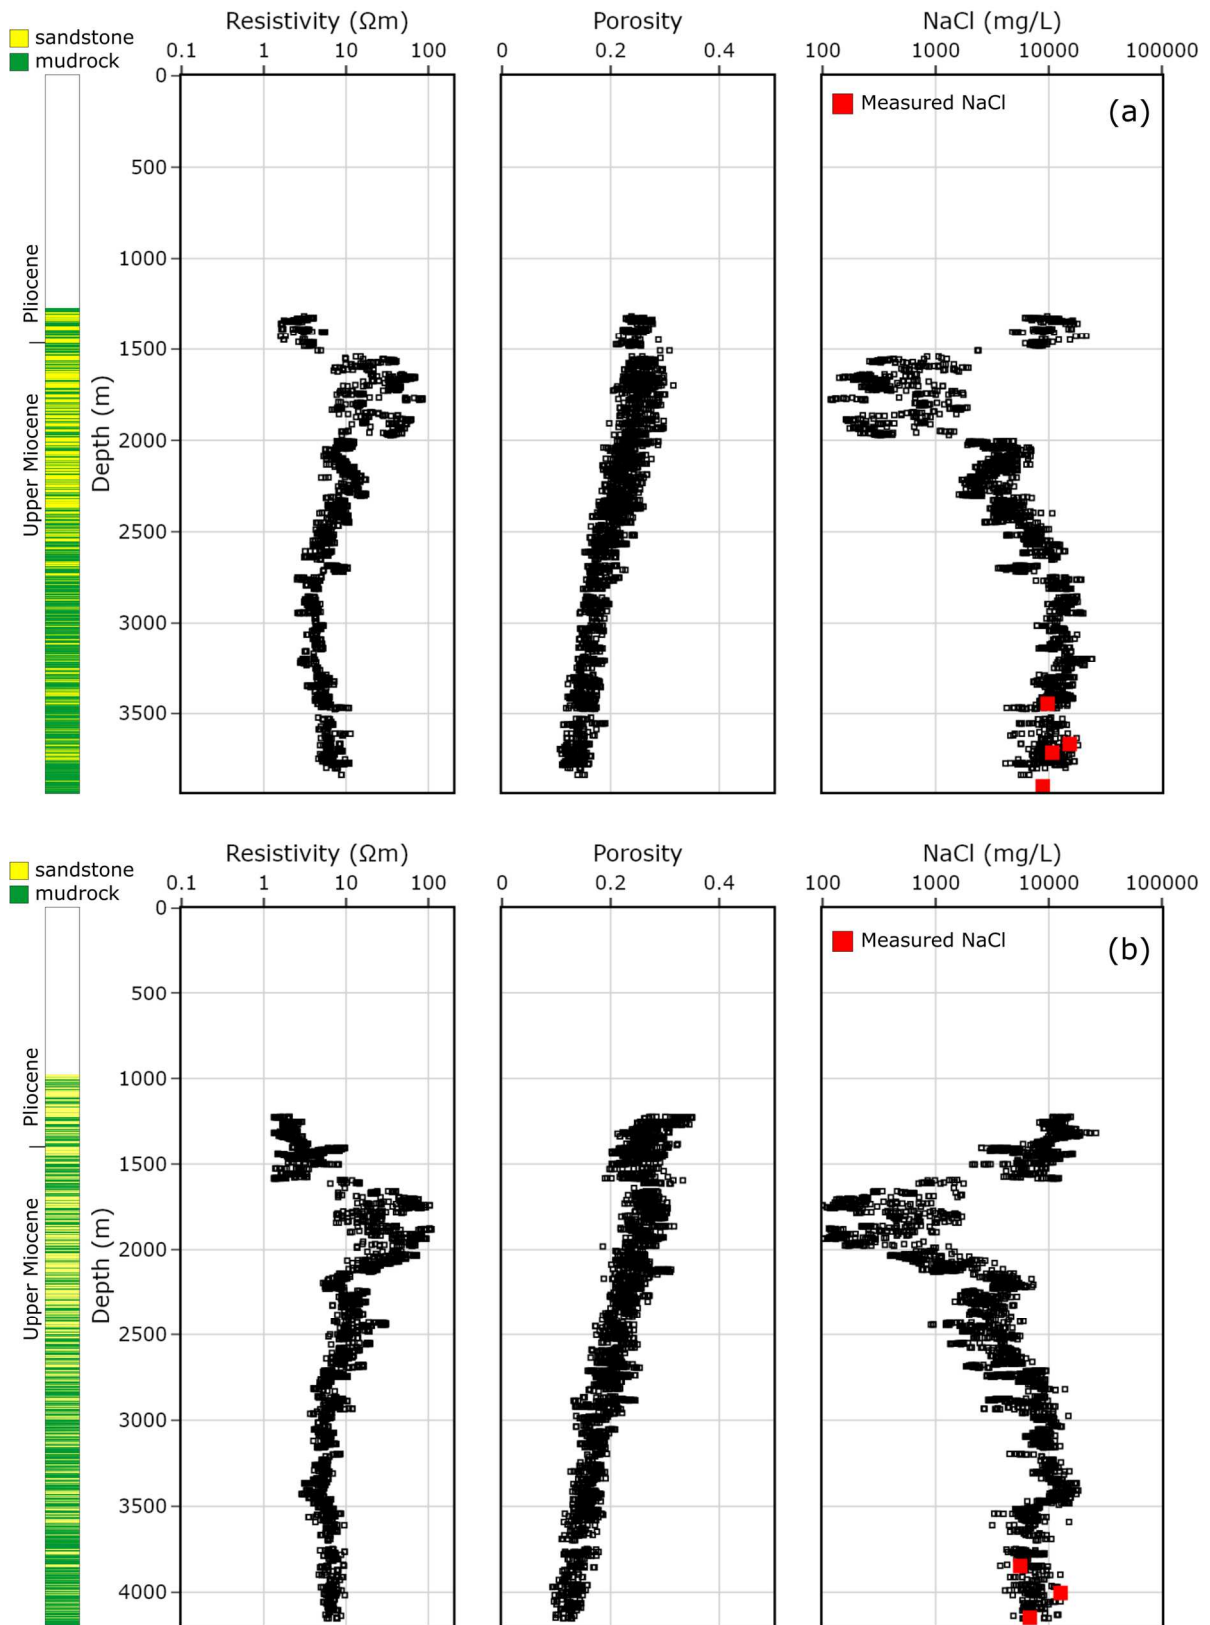

**Fig. S48** The result of NaCl estimation at **a** Well no. 34 and **b** Well no. 35

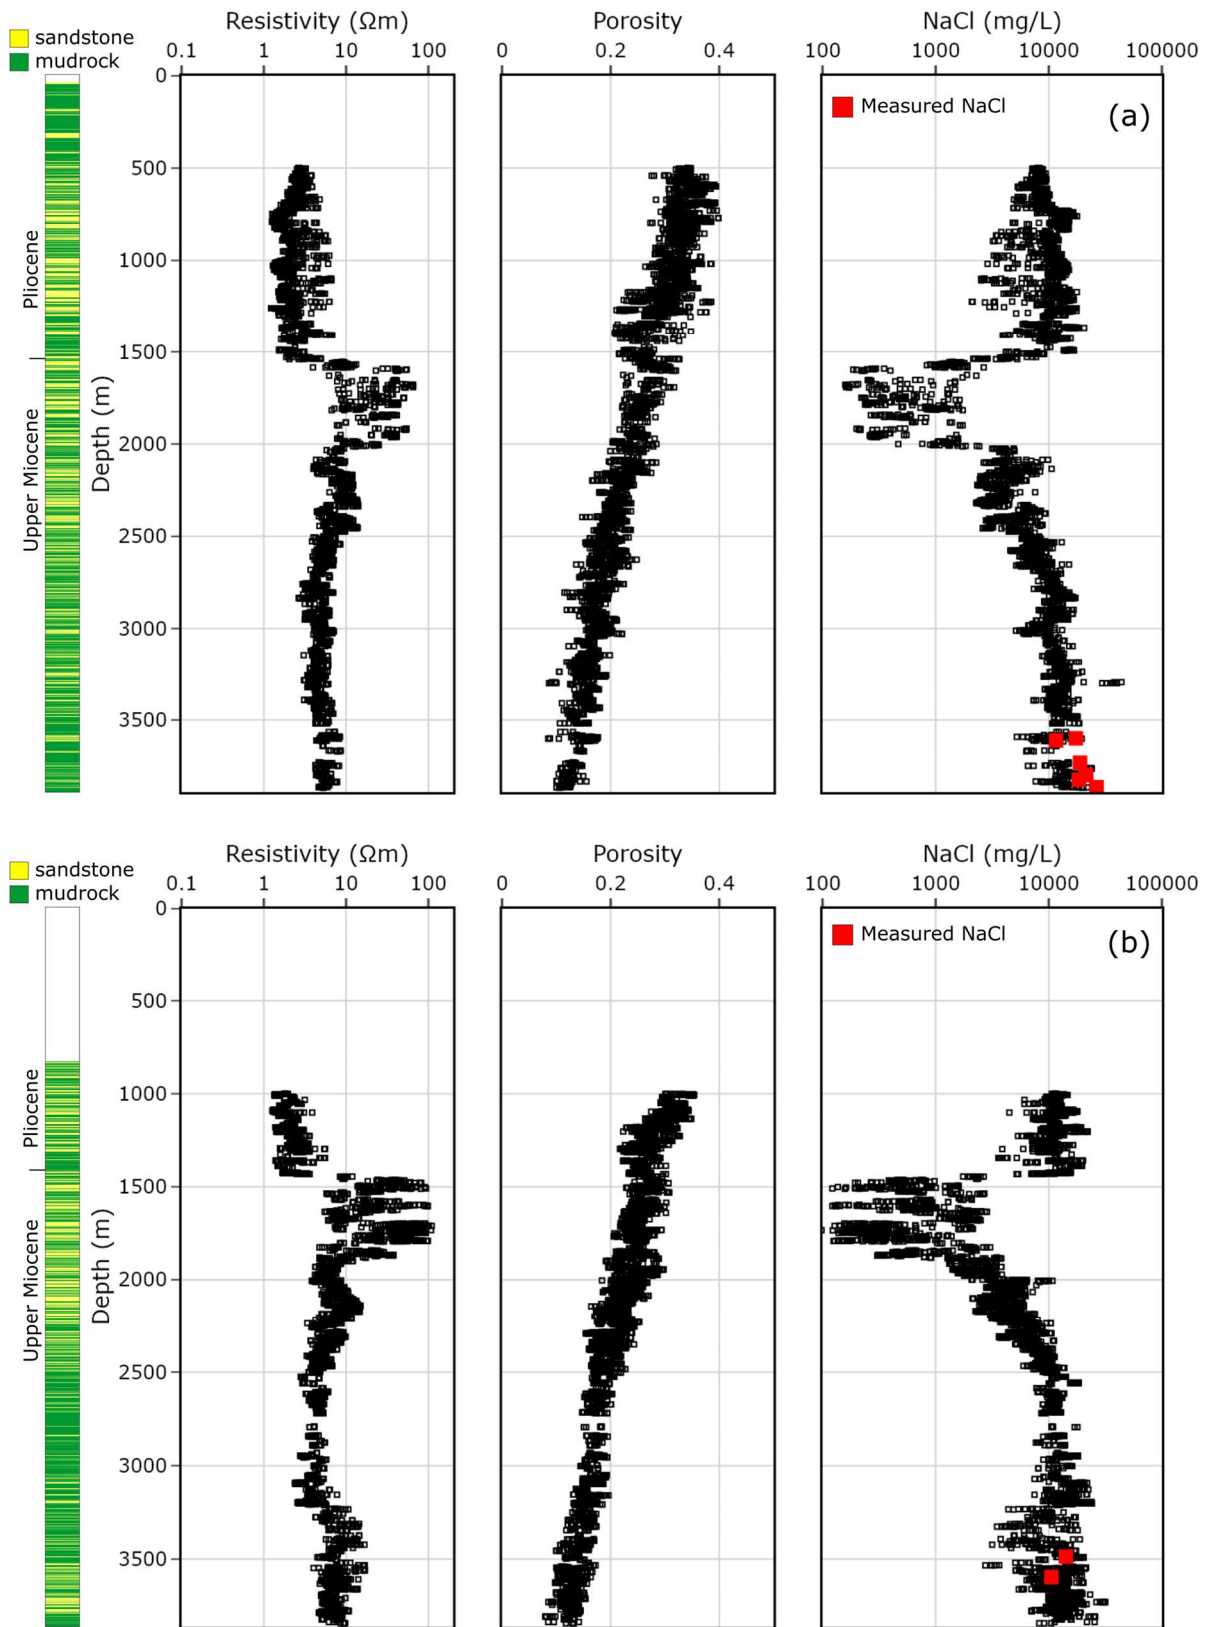

**Fig. S49** The result of NaCl estimation at **a** Well no. 36 and **b** Well no. 37

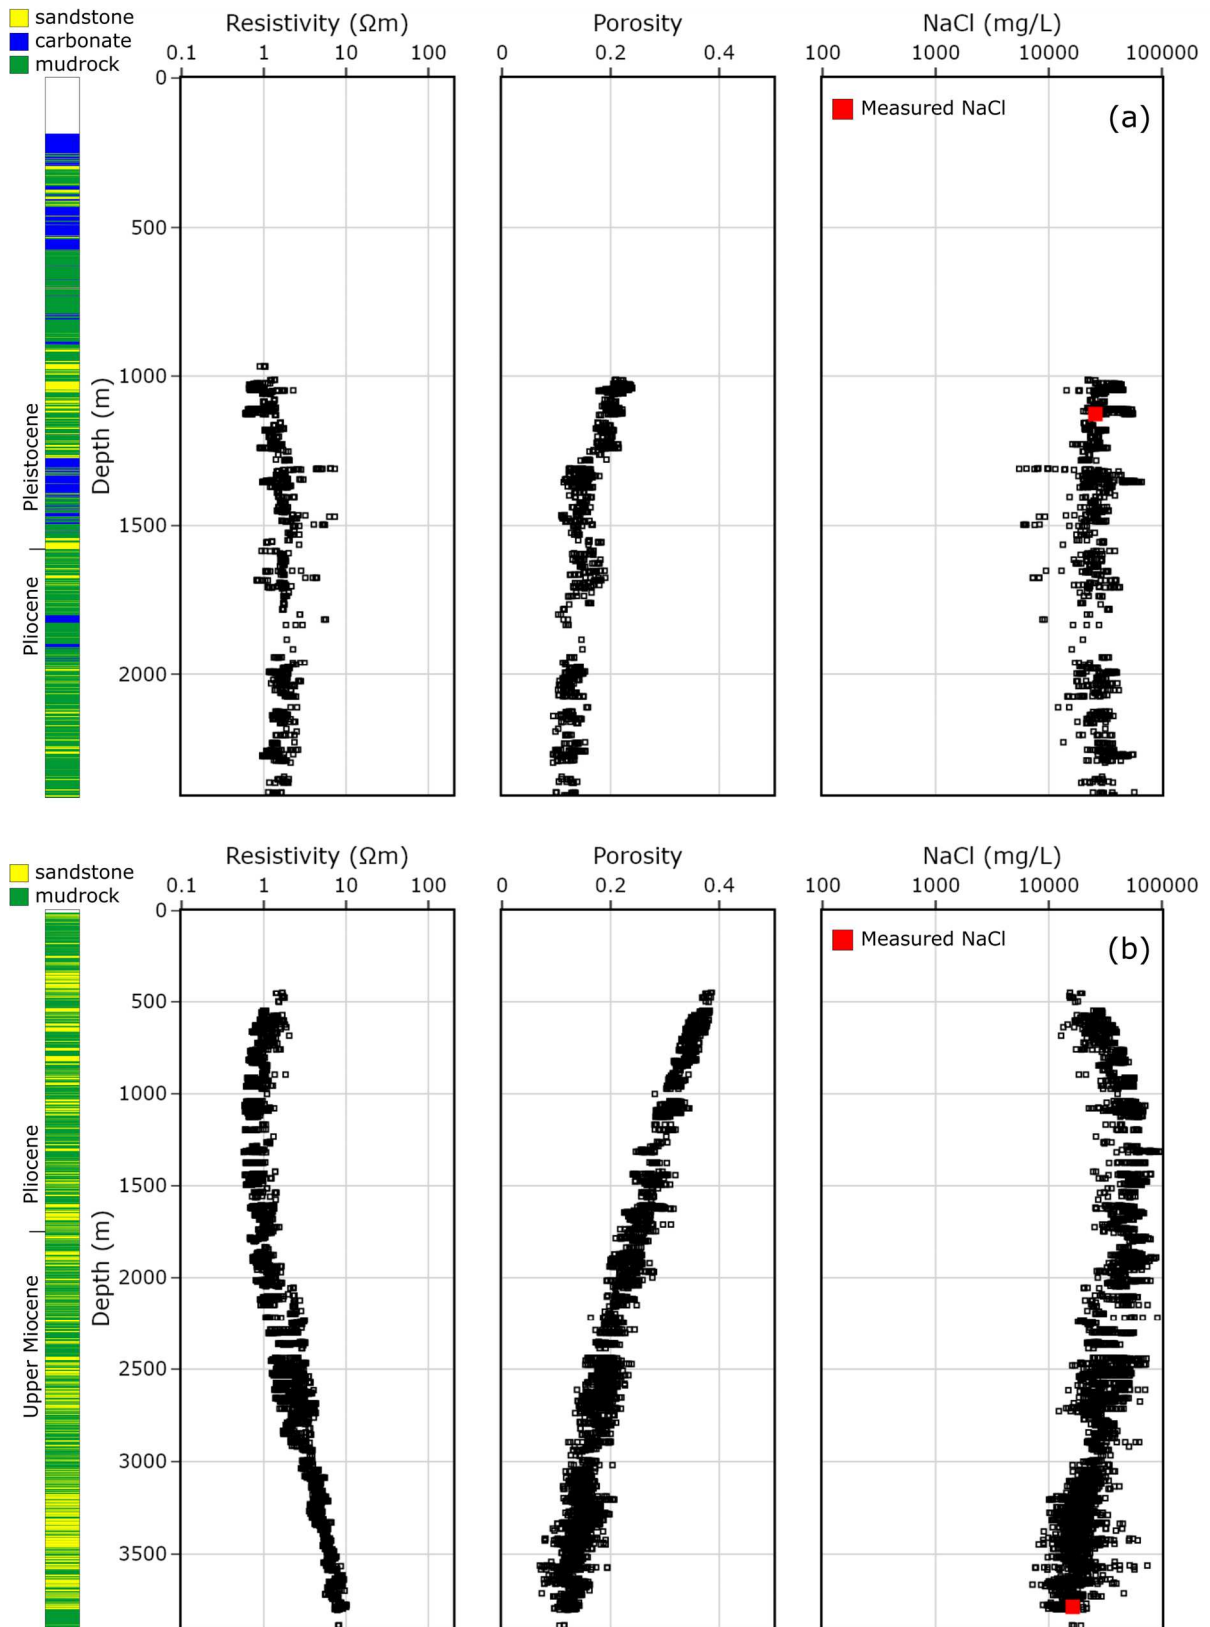

**Fig. S50** The result of NaCl estimation at **a** Well no. 38 and **b** Well no. 39

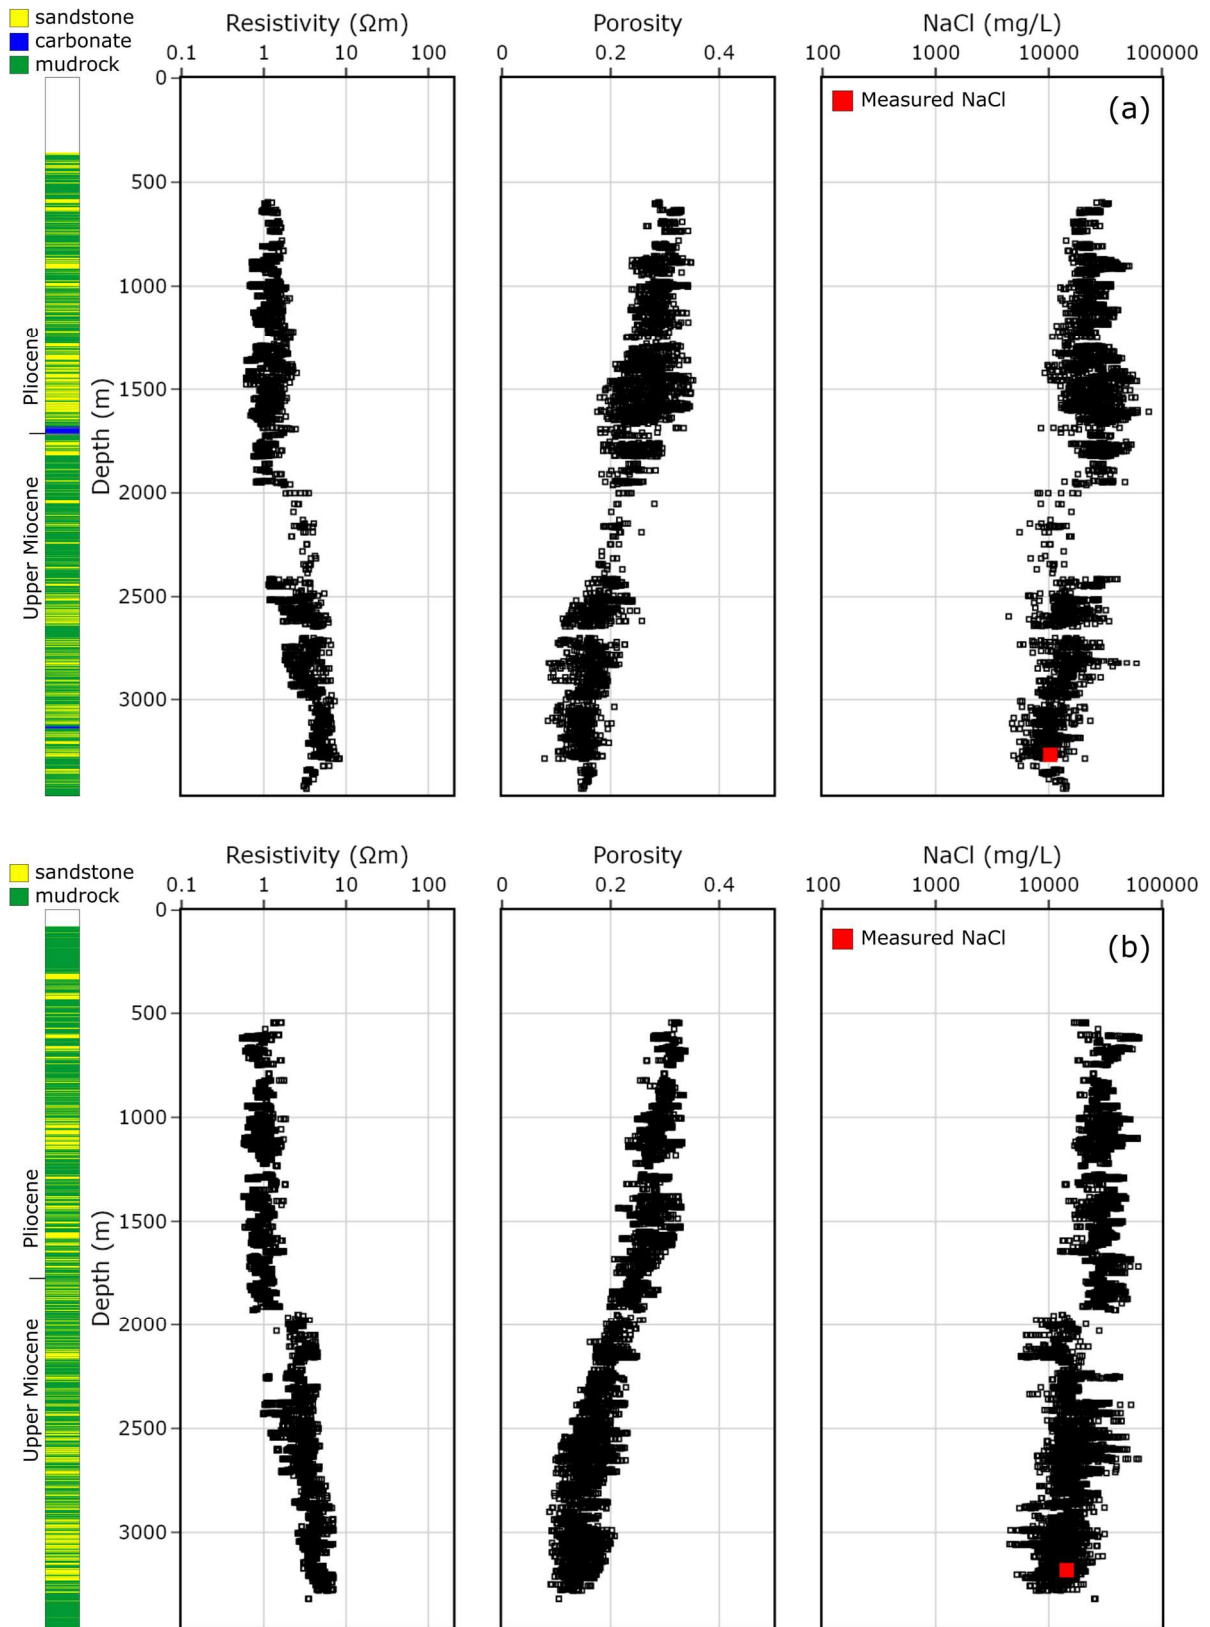

**Fig. S51** The result of NaCl estimation at **a** Well no. 40 and **b** Well no. 41

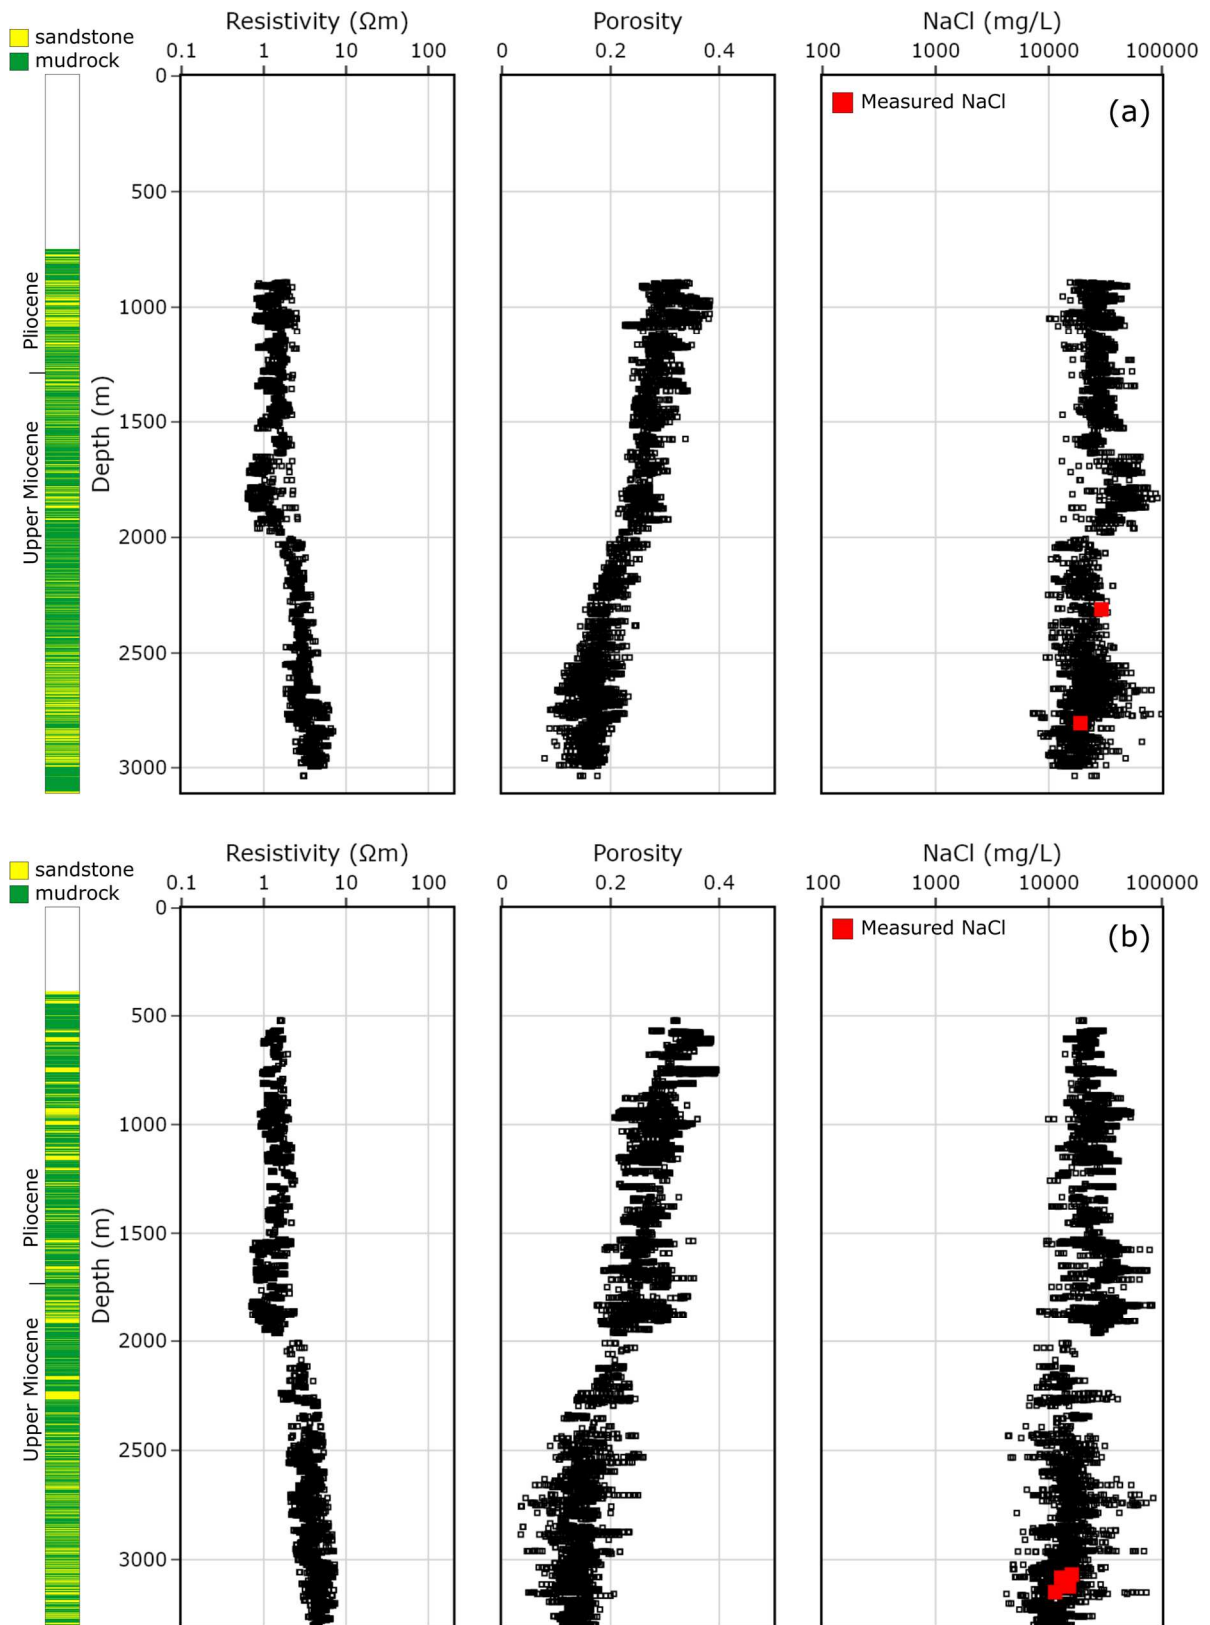

**Fig. S52** The result of NaCl estimation at **a** Well no. 42 and **b** Well no. 43

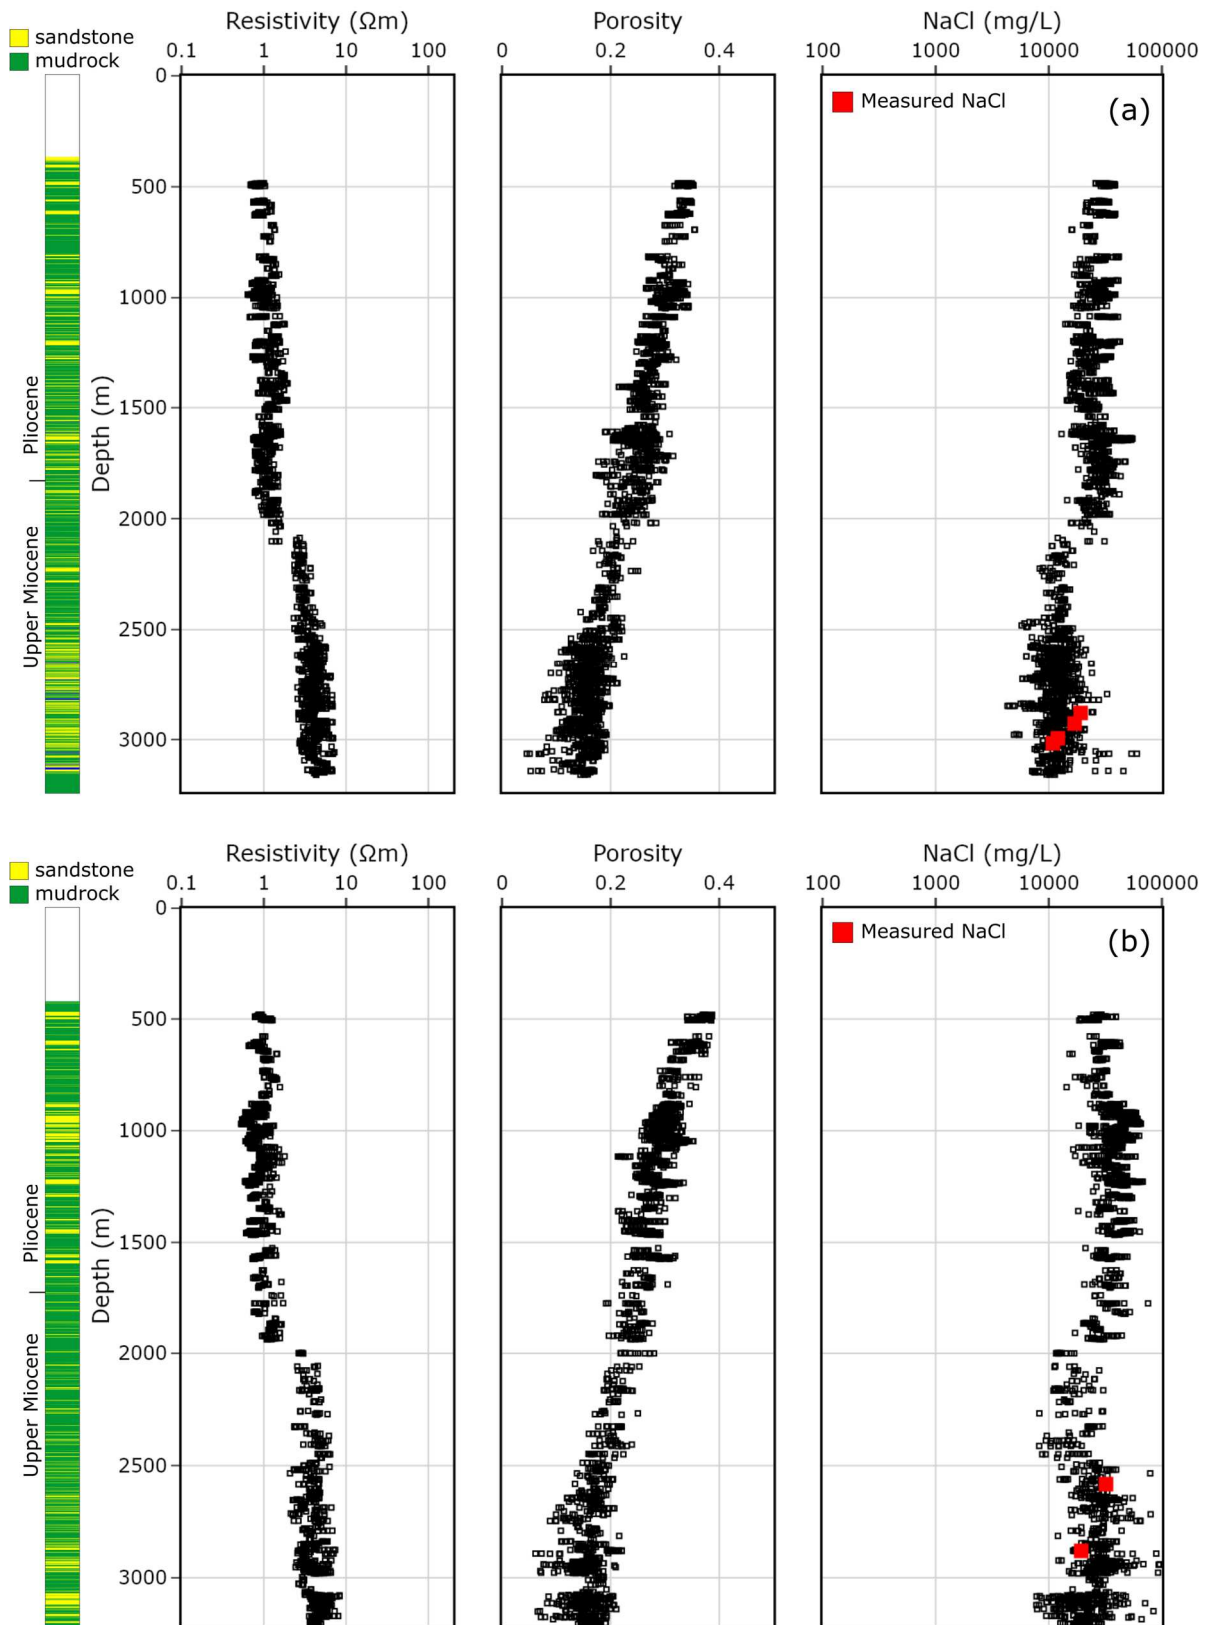

**Fig. S53** The result of NaCl estimation at **a** Well no. 44 and **b** Well no. 45

## References

Furlan S, Chaudhuri S, Clauer N, Sommer F (1995) Geochemistry of formation waters and hydrodynamic evolution of a young and restricted sedimentary basin (Mahakam Delta Basin, Indonesia). *Basin Research* 7:9–20. <https://doi.org/10.1111/j.1365-2117.1995.tb00091.x>

Numere D, Brigham WE, Standing MB (1997) Correlation for physical properties of petroleum reservoir brines. Stanford University Petroleum Research Institute
